# Supplementary material for: Uncontrolled Post-Industrial Landfill—Source of Metals, Potential Toxic Compounds, Dust, and Pathogens in Environment—A Case Study
Source: MDPI journal article supplement (doi:10.3390/molecules29071496), 2024-03-27
Supplement: s1 [file s1]

**Table S6.** IC<sub>50</sub> [mg/mL] values of soil extracts against cell lines.

| Sample | Cell Line |        |        |       |
|--------|-----------|--------|--------|-------|
|        | A-549     | Hep-G2 | Caco-2 | IEC-6 |
| S1     | nd        | nd     | nd     | 72.66 |
| S2     | nd        | nd     | nd     | 92.19 |
| S3     | nd        | nd     | nd     | 79.77 |
| S4     | nd        | nd     | nd     | 82.25 |
| S5     | nd        | nd     | nd     | 92.54 |
| S6     | nd        | nd     | 85.81  | 29.24 |
| S7     | nd        | nd     | nd     | nd    |
| S8     | nd        | nd     | nd     | nd    |

nd- not detected
