# Supplementary material for: Uncontrolled Post-Industrial Landfill—Source of Metals, Potential Toxic Compounds, Dust, and Pathogens in Environment—A Case Study
Source: MDPI journal article supplement (doi:10.3390/molecules29071496), 2024-03-27
Supplement: s1 [file s1]

**Table S1.** Media used for microbiological contamination of air analysis.

| Microorganism Type                                       | Medium / Producer                                                               | Incubation conditions (temperature /time) |
|----------------------------------------------------------|---------------------------------------------------------------------------------|-------------------------------------------|
| Fungi                                                    | Malt Extract Agar (MEA) medium with (0.1%) chloramphenicol / Merck Life Science | 25 ± 2 °C / 7 days                        |
| Xerophilic fungi                                         | DG18 LAB-AGAR™ (DG18 Agar)* / Biomaxima                                         | 25 ± 2 °C / 7 days                        |
| Bacteria<br>Psychrofilic bacteria<br>Mesophilic bacteria | Tryptic Soy Agar (TSA) * / Merck Life Science                                   | 30 ± 2 °C / 48 h                          |
| Haemolytic staphylococcus                                | Columbia Blood Agar* / Oxoid                                                    | 37 ± 2 °C / 24–48 h                       |
| Actinomycetes                                            | Pochon's agar* / Labomix                                                        | 25 ± 2 °C / 7 days                        |
| mannitol-positive<br><i>Staphylococcus</i> spp.          | Chapman Agar* / Merck Life Science                                              | 37 ± 2 °C / 24–48 h                       |
| <i>Pseudomonas fluorescens</i>                           | King B medium* / Hi Media Laboratories                                          | 30 ± 2 °C / 48 h                          |
| <i>Enterobacteriaceae</i>                                | Violet Red Bile Glucose Agar (VRBG LAB-AGAR) * / Biomaxima                      | 37 ± 2 °C / 24–48 h                       |
| sulfate-reducing<br>anaerobes**                          | Tryptose Sulfite Cycloserine Agar* / Merck Life Science                         | 30 ± 2 °C / 48 h<br>(anaerobic)           |

\* media with (0.2%) nystatin; \*\*determined in soil and leachate samples
