# Supplementary material for: Uncontrolled Post-Industrial Landfill—Source of Metals, Potential Toxic Compounds, Dust, and Pathogens in Environment—A Case Study
Source: MDPI journal article supplement (doi:10.3390/molecules29071496), 2024-03-27
Supplement: s1 [file s1]

**Table S2.** Summary of analysis of toxic compounds found in soil samples (P-value < 0.05; FDR < 0.05; VIP > 1; FC > 1.5). All compounds are identified on the basis of high precursor mass accuracy and also MSMS spectrum and isotopic patterns matching.

| Compound                            | Molecular Formula                             | RT [s] | Measured m/z | Mass Error [ppm] | mSigma | MS/MS Score | VIP <sup>a</sup> | P-value  | FDR      | FC <sup>b</sup> |
|-------------------------------------|-----------------------------------------------|--------|--------------|------------------|--------|-------------|------------------|----------|----------|-----------------|
| 2,4,8-Trimethyl-quinoline           | C <sub>12</sub> H <sub>13</sub> N             | 130.2  | 172.1119     | 0.89             | 7.0    | 903/1000    | 1.50             | 3.07E-04 | 4.54E-03 | 52.97           |
| Palmitamide                         | C <sub>16</sub> H <sub>33</sub> NO            | 300.9  | 256.2633     | 0.37             | 10.1   | 917/1000    | 1.68             | 8.34E-03 | 3.40E-02 | 2.26            |
| Phenanthridone                      | C <sub>13</sub> H <sub>9</sub> NO             | 182.8  | 196.0755     | 1.38             | 8.5    | 913/1000    | 1.34             | 7.18E-03 | 3.06E-02 | 37.31           |
| Dibenz(a,h)acridine                 | C <sub>21</sub> H <sub>13</sub> N             | 295.3  | 280.1118     | 0.82             | 19.7   | 960/1000    | 1.22             | 1.22E-03 | 7.93E-03 | 95.59           |
| Carbazole                           | C <sub>12</sub> H <sub>9</sub> N              | 132.3  | 168.0807     | 0.62             | 8.8    | 989/1000    | 1.22             | 2.06E-03 | 1.25E-02 | 117.03          |
| Benzo(f)quinoline                   | C <sub>13</sub> H <sub>9</sub> N              | 156.7  | 180.0807     | 0.46             | 5.4    | 930/1000    | 1.20             | 4.32E-03 | 2.07E-02 | 117.38          |
| 1-(m-tolyl)isoquinoline             | C <sub>16</sub> H <sub>13</sub> N             | 222.1  | 220.1120     | 0.89             | 21.8   | 847/1000    | 1.14             | 7.99E-03 | 3.29E-02 | 25.87           |
| Carboline                           | C <sub>11</sub> H <sub>8</sub> N <sub>2</sub> | 154.0  | 169.0760     | 0.20             | 19.3   | 948/1000    | 1.15             | 1.09E-02 | 4.14E-02 | 14.17           |
| 1-(p-Tolyl)cyclopropanecarbonitrile | C <sub>11</sub> H <sub>11</sub> N             | 114.3  | 158.0964     | 0.84             | 4.9    | 877/1000    | 1.09             | 5.00E-03 | 2.32E-02 | 12.05           |

<sup>a</sup>VIP scores derived from OPLS-DA model; <sup>b</sup>fold change between toxic and non-toxic samples calculated from the abundance mean values for each group. FC: fold change; FDR: false discovery rate; m/z: mass-to-charge ratio; VIP: variable influence on projection.
