# Supplementary material for: Uncontrolled Post-Industrial Landfill—Source of Metals, Potential Toxic Compounds, Dust, and Pathogens in Environment—A Case Study
Source: MDPI journal article supplement (doi:10.3390/molecules29071496), 2024-03-27
Supplement: s1 [file s1]

**Table S4.** Number of microorganisms in the water and soil at an tested uncontrolled postindustrial landfill

| Medium | Type of microorganisms                       | Sampling location | Mean                 | Median               | Minimum              | Maximum              | Standard deviation   |
|--------|----------------------------------------------|-------------------|----------------------|----------------------|----------------------|----------------------|----------------------|
| Water  | Psychrophilic bacteria                       | 1                 | 6.03x10 <sup>5</sup> | 6.00x10 <sup>5</sup> | 6.00x10 <sup>5</sup> | 6.10x10 <sup>5</sup> | 5.77x10 <sup>3</sup> |
|        |                                              | 2                 | 1.50x10 <sup>6</sup> | 1.48x10 <sup>6</sup> | 1.20x10 <sup>6</sup> | 1.81x10 <sup>6</sup> | 3.05x10 <sup>5</sup> |
|        | Mesophilic bacteria                          | 1                 | 1.87x10 <sup>5</sup> | 2.00x10 <sup>5</sup> | 1.40x10 <sup>5</sup> | 2.20x10 <sup>5</sup> | 4.16x10 <sup>4</sup> |
|        |                                              | 2                 | 2.30x10 <sup>6</sup> | 2.25x10 <sup>6</sup> | 2.10x10 <sup>6</sup> | 2.54x10 <sup>6</sup> | 2.24x10 <sup>5</sup> |
|        | Fungi                                        | 1                 | 5.33x10 <sup>1</sup> | 5.00x10 <sup>1</sup> | 4.00x10 <sup>1</sup> | 7.00x10 <sup>1</sup> | 1.53x10 <sup>1</sup> |
|        |                                              | 2                 | 3.33x10 <sup>1</sup> | 3.00x10 <sup>1</sup> | 3.00x10 <sup>1</sup> | 4.00x10 <sup>1</sup> | 5.77x10 <sup>0</sup> |
|        | Actinomycetes                                | 1                 | 1.33x10 <sup>1</sup> | 1.00x10 <sup>1</sup> | 1.00x10 <sup>1</sup> | 2.00x10 <sup>1</sup> | 5.77x10 <sup>0</sup> |
|        |                                              | 2                 | 2.00x10 <sup>1</sup> | 2.00x10 <sup>1</sup> | 1.00x10 <sup>1</sup> | 3.00x10 <sup>1</sup> | 1.00x10 <sup>1</sup> |
|        | Mannitol-positive <i>Staphylococcus</i> spp. | 1                 | 1.61x10 <sup>6</sup> | 1.60x10 <sup>6</sup> | 1.59x10 <sup>6</sup> | 1.63x10 <sup>6</sup> | 2.08x10 <sup>4</sup> |
|        |                                              | 2                 | 3.03x10 <sup>5</sup> | 3.00x10 <sup>5</sup> | 2.80x10 <sup>5</sup> | 3.30x10 <sup>5</sup> | 2.52x10 <sup>4</sup> |
|        | Haemolytic <i>Staphylococcus</i>             | 1                 | 2.80x10 <sup>4</sup> | 3.10x10 <sup>4</sup> | 2.00x10 <sup>4</sup> | 3.30x10 <sup>4</sup> | 7.00x10 <sup>3</sup> |
|        |                                              | 2                 | 8.80x10 <sup>4</sup> | 8.80x10 <sup>4</sup> | 8.10x10 <sup>4</sup> | 9.50x10 <sup>4</sup> | 7.00x10 <sup>3</sup> |
|        | <i>Enterobacteriaceae</i>                    | 1                 | 4.00x10 <sup>2</sup> | 4.00x10 <sup>2</sup> | 2.00x10 <sup>2</sup> | 6.00x10 <sup>2</sup> | 2.00x10 <sup>2</sup> |
|        |                                              | 2                 | 1.27x10 <sup>3</sup> | 1.30x10 <sup>3</sup> | 1.20x10 <sup>3</sup> | 1.30x10 <sup>3</sup> | 5.77x10 <sup>1</sup> |
|        | <i>Pseudomonas fluorescens</i>               | 1                 | 1.33x10 <sup>1</sup> | 1.00x10 <sup>1</sup> | 1.00x10 <sup>1</sup> | 2.00x10 <sup>1</sup> | 5.77x10 <sup>0</sup> |
|        |                                              | 2                 | 4.33x10 <sup>1</sup> | 4.00x10 <sup>1</sup> | 4.00x10 <sup>1</sup> | 5.00x10 <sup>1</sup> | 5.77x10 <sup>0</sup> |
|        | Sulfate reducing anaerobes                   | 1                 | 2.73x10 <sup>4</sup> | 2.80x10 <sup>4</sup> | 1.50x10 <sup>4</sup> | 3.90x10 <sup>4</sup> | 1.20x10 <sup>4</sup> |
|        |                                              | 2                 | 1.35x10 <sup>5</sup> | 1.36x10 <sup>5</sup> | 1.25x10 <sup>5</sup> | 1.45x10 <sup>5</sup> | 1.00x10 <sup>4</sup> |
|        | Psychrophilic bacteria                       | 1                 | 1.06x10 <sup>6</sup> | 1.07x10 <sup>6</sup> | 6.00x10 <sup>5</sup> | 1.58x10 <sup>6</sup> | 4.31x10 <sup>5</sup> |
|        |                                              | 2                 | 2.69x10 <sup>6</sup> | 2.63x10 <sup>6</sup> | 2.50x10 <sup>6</sup> | 2.95x10 <sup>6</sup> | 2.32x10 <sup>5</sup> |
|        |                                              | 3                 | 1.45x10 <sup>6</sup> | 1.41x10 <sup>6</sup> | 1.20x10 <sup>6</sup> | 1.74x10 <sup>6</sup> | 2.72x10 <sup>5</sup> |
|        |                                              | 4                 | 7.07x10 <sup>5</sup> | 6.80x10 <sup>5</sup> | 5.70x10 <sup>5</sup> | 8.70x10 <sup>5</sup> | 1.52x10 <sup>5</sup> |
|        |                                              | 5                 | 5.77x10 <sup>5</sup> | 5.10x10 <sup>5</sup> | 4.90x10 <sup>5</sup> | 7.30x10 <sup>5</sup> | 1.33x10 <sup>5</sup> |
|        |                                              | 6                 | 6.07x10 <sup>5</sup> | 5.50x10 <sup>5</sup> | 5.40x10 <sup>5</sup> | 7.30x10 <sup>5</sup> | 1.07x10 <sup>5</sup> |
|        |                                              | 7                 | 1.75x10 <sup>6</sup> | 1.76x10 <sup>6</sup> | 1.65x10 <sup>6</sup> | 1.85x10 <sup>6</sup> | 1.00x10 <sup>5</sup> |
|        |                                              | 8                 | 1.48x10 <sup>6</sup> | 1.55x10 <sup>6</sup> | 1.26x10 <sup>6</sup> | 1.64x10 <sup>6</sup> | 2.00x10 <sup>5</sup> |
| Soil   | Mesophilic bacteria                          | 1                 | 8.40x10 <sup>5</sup> | 8.55x10 <sup>5</sup> | 7.50x10 <sup>5</sup> | 9.00x10 <sup>5</sup> | 6.23x10 <sup>4</sup> |
|        |                                              | 2                 | 4.33x10 <sup>5</sup> | 4.20x10 <sup>5</sup> | 3.90x10 <sup>5</sup> | 4.90x10 <sup>5</sup> | 5.13x10 <sup>4</sup> |
|        |                                              | 3                 | 5.30x10 <sup>5</sup> | 4.00x10 <sup>5</sup> | 3.90x10 <sup>5</sup> | 8.00x10 <sup>5</sup> | 2.34x10 <sup>5</sup> |
|        |                                              | 4                 | 1.21x10 <sup>6</sup> | 1.20x10 <sup>6</sup> | 1.18x10 <sup>6</sup> | 1.26x10 <sup>6</sup> | 4.16x10 <sup>4</sup> |
|        |                                              | 5                 | 2.80x10 <sup>5</sup> | 2.80x10 <sup>5</sup> | 2.50x10 <sup>5</sup> | 3.10x10 <sup>5</sup> | 3.00x10 <sup>4</sup> |
|        |                                              | 6                 | 8.33x10 <sup>4</sup> | 8.00x10 <sup>4</sup> | 8.00x10 <sup>4</sup> | 9.00x10 <sup>4</sup> | 5.77x10 <sup>3</sup> |
|        |                                              | 7                 | 1.71x10 <sup>6</sup> | 4.80x10 <sup>5</sup> | 3.40x10 <sup>5</sup> | 4.30x10 <sup>6</sup> | 2.25x10 <sup>6</sup> |
|        |                                              | 8                 | 5.44x10 <sup>5</sup> | 5.20x10 <sup>5</sup> | 4.72x10 <sup>5</sup> | 6.40x10 <sup>5</sup> | 8.65x10 <sup>4</sup> |
|        | Fungi                                        | 1                 | 2.50x10 <sup>3</sup> | 2.35x10 <sup>3</sup> | 1.10x10 <sup>3</sup> | 4.10x10 <sup>3</sup> | 1.47x10 <sup>3</sup> |
|        |                                              | 2                 | 4.53x10 <sup>3</sup> | 4.60x10 <sup>3</sup> | 4.10x10 <sup>3</sup> | 4.90x10 <sup>3</sup> | 4.04x10 <sup>2</sup> |
|        |                                              | 3                 | 4.33x10 <sup>3</sup> | 4.40x10 <sup>3</sup> | 3.90x10 <sup>3</sup> | 4.70x10 <sup>3</sup> | 4.04x10 <sup>2</sup> |
|        |                                              | 4                 | 3.77x10 <sup>3</sup> | 3.80x10 <sup>3</sup> | 3.60x10 <sup>3</sup> | 3.90x10 <sup>3</sup> | 1.53x10 <sup>2</sup> |
|        |                                              | 5                 | 4.97x10 <sup>3</sup> | 5.00x10 <sup>3</sup> | 4.50x10 <sup>3</sup> | 5.40x10 <sup>3</sup> | 4.51x10 <sup>2</sup> |
|        |                                              | 6                 | 4.43x10 <sup>3</sup> | 4.80x10 <sup>3</sup> | 3.30x10 <sup>3</sup> | 5.20x10 <sup>3</sup> | 1.00x10 <sup>3</sup> |
|        |                                              | 7                 | 4.00x10 <sup>3</sup> | 4.10x10 <sup>3</sup> | 3.60x10 <sup>3</sup> | 4.30x10 <sup>3</sup> | 3.61x10 <sup>2</sup> |
|        |                                              | 8                 | 1.73x10 <sup>3</sup> | 1.70x10 <sup>3</sup> | 1.40x10 <sup>3</sup> | 2.10x10 <sup>3</sup> | 3.51x10 <sup>2</sup> |

|                                                 |   |                      |                      |                      |                      |                      |
|-------------------------------------------------|---|----------------------|----------------------|----------------------|----------------------|----------------------|
| Actinomycetes                                   | 1 | 1.20x10 <sup>3</sup> | 1.00x10 <sup>3</sup> | 2.00x10 <sup>2</sup> | 2.00x10 <sup>3</sup> | 6.93x10 <sup>2</sup> |
|                                                 | 2 | 3.67x10 <sup>3</sup> | 3.00x10 <sup>3</sup> | 3.00x10 <sup>3</sup> | 5.00x10 <sup>3</sup> | 1.15x10 <sup>3</sup> |
|                                                 | 3 | 4.83x10 <sup>4</sup> | 4.50x10 <sup>4</sup> | 4.00x10 <sup>4</sup> | 6.00x10 <sup>4</sup> | 1.04x10 <sup>4</sup> |
|                                                 | 4 | 1.33x10 <sup>4</sup> | 1.00x10 <sup>4</sup> | 1.00x10 <sup>4</sup> | 2.00x10 <sup>4</sup> | 5.77x10 <sup>3</sup> |
|                                                 | 5 | 2.33x10 <sup>4</sup> | 2.00x10 <sup>4</sup> | 2.00x10 <sup>4</sup> | 3.00x10 <sup>4</sup> | 5.77x10 <sup>3</sup> |
|                                                 | 6 | 1.30x10 <sup>5</sup> | 1.30x10 <sup>5</sup> | 1.10x10 <sup>5</sup> | 1.50x10 <sup>5</sup> | 2.00x10 <sup>4</sup> |
|                                                 | 7 | 8.67x10 <sup>4</sup> | 8.00x10 <sup>4</sup> | 8.00x10 <sup>4</sup> | 1.00x10 <sup>5</sup> | 1.15x10 <sup>4</sup> |
|                                                 | 8 | 8.83x10 <sup>4</sup> | 8.80x10 <sup>4</sup> | 8.10x10 <sup>4</sup> | 9.60x10 <sup>4</sup> | 7.51x10 <sup>3</sup> |
| Mannitol-positive<br><i>Staphylococcus</i> spp. | 1 | 3.20x10 <sup>3</sup> | 3.35x10 <sup>3</sup> | 1.00x10 <sup>3</sup> | 5.50x10 <sup>3</sup> | 2.09x10 <sup>3</sup> |
|                                                 | 2 | 4.33x10 <sup>3</sup> | 5.00x10 <sup>3</sup> | 3.00x10 <sup>3</sup> | 5.00x10 <sup>3</sup> | 1.15x10 <sup>3</sup> |
|                                                 | 3 | 5.33x10 <sup>3</sup> | 5.00x10 <sup>3</sup> | 4.00x10 <sup>3</sup> | 7.00x10 <sup>3</sup> | 1.53x10 <sup>3</sup> |
|                                                 | 4 | 2.00x10 <sup>3</sup> | 2.00x10 <sup>3</sup> | 1.00x10 <sup>3</sup> | 3.00x10 <sup>3</sup> | 1.00x10 <sup>3</sup> |
|                                                 | 5 | 1.67x10 <sup>3</sup> | 2.00x10 <sup>3</sup> | 1.00x10 <sup>3</sup> | 2.00x10 <sup>3</sup> | 5.77x10 <sup>2</sup> |
|                                                 | 6 | 1.67x10 <sup>3</sup> | 2.00x10 <sup>3</sup> | 1.00x10 <sup>3</sup> | 2.00x10 <sup>3</sup> | 5.77x10 <sup>2</sup> |
|                                                 | 7 | 1.67x10 <sup>3</sup> | 2.00x10 <sup>3</sup> | 1.00x10 <sup>3</sup> | 2.00x10 <sup>3</sup> | 5.77x10 <sup>2</sup> |
|                                                 | 8 | 1.83x10 <sup>3</sup> | 1.90x10 <sup>3</sup> | 1.20x10 <sup>3</sup> | 2.40x10 <sup>3</sup> | 6.03x10 <sup>2</sup> |
| Haemolytic<br><i>Staphylococcus</i>             | 1 | 2.87x10 <sup>4</sup> | 2.80x10 <sup>4</sup> | 9.00x10 <sup>3</sup> | 5.20x10 <sup>4</sup> | 1.51x10 <sup>4</sup> |
|                                                 | 2 | 9.73x10 <sup>4</sup> | 9.90x10 <sup>4</sup> | 9.40x10 <sup>4</sup> | 9.90x10 <sup>4</sup> | 2.89x10 <sup>3</sup> |
|                                                 | 3 | 5.13x10 <sup>4</sup> | 5.10x10 <sup>4</sup> | 4.80x10 <sup>4</sup> | 5.50x10 <sup>4</sup> | 3.51x10 <sup>3</sup> |
|                                                 | 4 | 3.77x10 <sup>4</sup> | 3.80x10 <sup>4</sup> | 3.50x10 <sup>4</sup> | 4.00x10 <sup>4</sup> | 2.52x10 <sup>3</sup> |
|                                                 | 5 | 5.80x10 <sup>4</sup> | 5.50x10 <sup>4</sup> | 4.10x10 <sup>4</sup> | 7.80x10 <sup>4</sup> | 1.87x10 <sup>4</sup> |
|                                                 | 6 | 1.93x10 <sup>4</sup> | 1.50x10 <sup>4</sup> | 1.40x10 <sup>4</sup> | 2.90x10 <sup>4</sup> | 8.39x10 <sup>3</sup> |
|                                                 | 7 | 5.67x10 <sup>4</sup> | 5.10x10 <sup>4</sup> | 5.00x10 <sup>4</sup> | 6.90x10 <sup>4</sup> | 1.07x10 <sup>4</sup> |
|                                                 | 8 | 5.40x10 <sup>4</sup> | 5.50x10 <sup>4</sup> | 4.90x10 <sup>4</sup> | 5.80x10 <sup>4</sup> | 4.58x10 <sup>3</sup> |
| <i>Enterobacteriaceae</i>                       | 1 | 6.80x10 <sup>3</sup> | 6.15x10 <sup>3</sup> | 3.20x10 <sup>3</sup> | 1.05x10 <sup>4</sup> | 2.89x10 <sup>3</sup> |
|                                                 | 2 | 6.17x10 <sup>3</sup> | 6.10x10 <sup>3</sup> | 5.80x10 <sup>3</sup> | 6.60x10 <sup>3</sup> | 4.04x10 <sup>2</sup> |
|                                                 | 3 | 1.28x10 <sup>4</sup> | 1.29x10 <sup>4</sup> | 9.40x10 <sup>3</sup> | 1.60x10 <sup>4</sup> | 3.30x10 <sup>3</sup> |
|                                                 | 4 | 2.33x10 <sup>3</sup> | 2.20x10 <sup>3</sup> | 2.10x10 <sup>3</sup> | 2.70x10 <sup>3</sup> | 3.21x10 <sup>2</sup> |
|                                                 | 5 | 2.74x10 <sup>4</sup> | 2.36x10 <sup>4</sup> | 2.26x10 <sup>4</sup> | 3.60x10 <sup>4</sup> | 7.46x10 <sup>3</sup> |
|                                                 | 6 | 8.00x10 <sup>2</sup> | 1.10x10 <sup>3</sup> | 1.00x10 <sup>2</sup> | 1.20x10 <sup>3</sup> | 6.08x10 <sup>2</sup> |
|                                                 | 7 | 2.67x10 <sup>2</sup> | 3.00x10 <sup>2</sup> | 2.00x10 <sup>2</sup> | 3.00x10 <sup>2</sup> | 5.77x10 <sup>1</sup> |
|                                                 | 8 | 3.33x10 <sup>2</sup> | 3.00x10 <sup>2</sup> | 3.00x10 <sup>2</sup> | 4.00x10 <sup>2</sup> | 5.77x10 <sup>1</sup> |
| <i>Pseudomonas<br/>fluorescens</i>              | 1 | 4.17x10 <sup>1</sup> | 3.00x10 <sup>1</sup> | 1.00x10 <sup>1</sup> | 1.00x10 <sup>2</sup> | 3.82x10 <sup>1</sup> |
|                                                 | 2 | 2.33x10 <sup>1</sup> | 2.00x10 <sup>1</sup> | 2.00x10 <sup>1</sup> | 3.00x10 <sup>1</sup> | 5.77x10 <sup>0</sup> |
|                                                 | 3 | 1.73x10 <sup>3</sup> | 1.70x10 <sup>3</sup> | 1.60x10 <sup>3</sup> | 1.90x10 <sup>3</sup> | 1.53x10 <sup>2</sup> |
|                                                 | 4 | 6.33x10 <sup>1</sup> | 6.00x10 <sup>1</sup> | 6.00x10 <sup>1</sup> | 7.00x10 <sup>1</sup> | 5.77x10 <sup>0</sup> |
|                                                 | 5 | 9.90x10 <sup>2</sup> | 2.40x10 <sup>2</sup> | 2.30x10 <sup>2</sup> | 2.50x10 <sup>3</sup> | 1.31x10 <sup>3</sup> |
|                                                 | 6 | 2.37x10 <sup>3</sup> | 2.30x10 <sup>3</sup> | 2.20x10 <sup>3</sup> | 2.60x10 <sup>3</sup> | 2.08x10 <sup>2</sup> |
|                                                 | 7 | 2.67x10 <sup>2</sup> | 2.00x10 <sup>2</sup> | 2.00x10 <sup>2</sup> | 4.00x10 <sup>2</sup> | 1.15x10 <sup>2</sup> |
|                                                 | 8 | 1.67x10 <sup>2</sup> | 1.00x10 <sup>2</sup> | 1.00x10 <sup>2</sup> | 3.00x10 <sup>2</sup> | 1.15x10 <sup>2</sup> |
| Sulfate reducing<br>anaerobes                   | 1 | 2.78x10 <sup>1</sup> | 3.00x10 <sup>1</sup> | 1.80x10 <sup>1</sup> | 3.30x10 <sup>1</sup> | 5.85x10 <sup>0</sup> |
|                                                 | 2 | 1.33x10 <sup>2</sup> | 1.30x10 <sup>2</sup> | 1.28x10 <sup>2</sup> | 1.40x10 <sup>2</sup> | 6.43x10 <sup>0</sup> |
|                                                 | 3 | 5.43x10 <sup>1</sup> | 5.10x10 <sup>1</sup> | 4.40x10 <sup>1</sup> | 6.80x10 <sup>1</sup> | 1.23x10 <sup>1</sup> |
|                                                 | 4 | 5.77x10 <sup>1</sup> | 5.50x10 <sup>1</sup> | 3.70x10 <sup>1</sup> | 8.10x10 <sup>1</sup> | 2.21x10 <sup>1</sup> |
|                                                 | 5 | 1.12x10 <sup>2</sup> | 1.02x10 <sup>2</sup> | 8.80x10 <sup>1</sup> | 1.45x10 <sup>2</sup> | 2.97x10 <sup>1</sup> |
|                                                 | 6 | 4.30x10 <sup>1</sup> | 4.10x10 <sup>1</sup> | 3.30x10 <sup>1</sup> | 5.50x10 <sup>1</sup> | 1.11x10 <sup>1</sup> |

|   |                    |                    |                    |                    |                    |
|---|--------------------|--------------------|--------------------|--------------------|--------------------|
| 7 | $8.63 \times 10^1$ | $8.10 \times 10^1$ | $8.00 \times 10^1$ | $9.80 \times 10^1$ | $1.01 \times 10^1$ |
| 8 | $7.70 \times 10^1$ | $7.70 \times 10^1$ | $7.00 \times 10^1$ | $8.40 \times 10^1$ | $7.00 \times 10^0$ |
