# Supplementary material for: Uncontrolled Post-Industrial Landfill—Source of Metals, Potential Toxic Compounds, Dust, and Pathogens in Environment—A Case Study
Source: MDPI journal article supplement (doi:10.3390/molecules29071496), 2024-03-27
Supplement: s1 [file s1]

**Table S3.** Number of microorganisms in the air at an tested uncontrolled postindustrial landfill

| Type of microorganisms                          | Sampling location | Mean                 | Median               | Minimum              | Maximum              | Standard deviation   |
|-------------------------------------------------|-------------------|----------------------|----------------------|----------------------|----------------------|----------------------|
| Bacteria                                        | 1                 | 2.70x10 <sup>3</sup> | 7.60x10 <sup>2</sup> | 6.30x10 <sup>2</sup> | 6.70x10 <sup>3</sup> | 3.47x10 <sup>3</sup> |
|                                                 | 2                 | 4.90x10 <sup>2</sup> | 4.90x10 <sup>2</sup> | 3.70x10 <sup>2</sup> | 6.10x10 <sup>2</sup> | 1.20x10 <sup>2</sup> |
|                                                 | 3                 | 3.21x10 <sup>3</sup> | 1.15x10 <sup>3</sup> | 4.90x10 <sup>2</sup> | 8.00x10 <sup>3</sup> | 4.16x10 <sup>3</sup> |
|                                                 | 4                 | 3.33x10 <sup>2</sup> | 3.30x10 <sup>2</sup> | 2.40x10 <sup>2</sup> | 4.30x10 <sup>2</sup> | 9.50x10 <sup>1</sup> |
|                                                 | 5                 | 4.80x10 <sup>2</sup> | 4.80x10 <sup>2</sup> | 3.30x10 <sup>2</sup> | 6.30x10 <sup>2</sup> | 1.50x10 <sup>2</sup> |
|                                                 | 6                 | 1.32x10 <sup>3</sup> | 4.80x10 <sup>2</sup> | 3.90x10 <sup>2</sup> | 3.10x10 <sup>3</sup> | 1.54x10 <sup>3</sup> |
|                                                 | 7                 | 2.13x10 <sup>2</sup> | 2.20x10 <sup>2</sup> | 2.00x10 <sup>2</sup> | 2.20x10 <sup>2</sup> | 1.15x10 <sup>1</sup> |
|                                                 | 8                 | 9.33x10 <sup>1</sup> | 1.00x10 <sup>2</sup> | 5.00x10 <sup>1</sup> | 1.30x10 <sup>2</sup> | 4.04x10 <sup>1</sup> |
| Fungi                                           | 1                 | 1.67x10 <sup>2</sup> | 1.80x10 <sup>2</sup> | 1.20x10 <sup>2</sup> | 2.00x10 <sup>2</sup> | 4.16x10 <sup>1</sup> |
|                                                 | 2                 | 2.07x10 <sup>2</sup> | 2.00x10 <sup>2</sup> | 2.00x10 <sup>2</sup> | 2.20x10 <sup>2</sup> | 1.15x10 <sup>1</sup> |
|                                                 | 3                 | 3.60x10 <sup>2</sup> | 3.70x10 <sup>2</sup> | 1.90x10 <sup>2</sup> | 5.20x10 <sup>2</sup> | 1.65x10 <sup>2</sup> |
|                                                 | 4                 | 2.43x10 <sup>2</sup> | 2.60x10 <sup>2</sup> | 1.80x10 <sup>2</sup> | 2.90x10 <sup>2</sup> | 5.69x10 <sup>1</sup> |
|                                                 | 5                 | 2.00x10 <sup>2</sup> | 2.00x10 <sup>2</sup> | 1.80x10 <sup>2</sup> | 2.20x10 <sup>2</sup> | 2.00x10 <sup>1</sup> |
|                                                 | 6                 | 1.37x10 <sup>2</sup> | 1.30x10 <sup>2</sup> | 1.00x10 <sup>2</sup> | 1.80x10 <sup>2</sup> | 4.04x10 <sup>1</sup> |
|                                                 | 7                 | 9.00x10 <sup>1</sup> | 9.00x10 <sup>1</sup> | 8.00x10 <sup>1</sup> | 1.00x10 <sup>2</sup> | 1.00x10 <sup>1</sup> |
|                                                 | 8                 | 9.00x10 <sup>1</sup> | 9.00x10 <sup>1</sup> | 8.00x10 <sup>1</sup> | 1.00x10 <sup>2</sup> | 1.00x10 <sup>1</sup> |
| Xerophilic fungi                                | 1                 | 7.23x10 <sup>2</sup> | 7.60x10 <sup>2</sup> | 5.80x10 <sup>2</sup> | 8.30x10 <sup>2</sup> | 1.29x10 <sup>2</sup> |
|                                                 | 2                 | 4.03x10 <sup>2</sup> | 3.90x10 <sup>2</sup> | 3.40x10 <sup>2</sup> | 4.80x10 <sup>2</sup> | 7.09x10 <sup>1</sup> |
|                                                 | 3                 | 4.83x10 <sup>2</sup> | 4.80x10 <sup>2</sup> | 4.60x10 <sup>2</sup> | 5.10x10 <sup>2</sup> | 2.52x10 <sup>1</sup> |
|                                                 | 4                 | 3.77x10 <sup>2</sup> | 3.90x10 <sup>2</sup> | 3.40x10 <sup>2</sup> | 4.00x10 <sup>2</sup> | 3.21x10 <sup>1</sup> |
|                                                 | 5                 | 2.63x10 <sup>2</sup> | 2.70x10 <sup>2</sup> | 2.30x10 <sup>2</sup> | 2.90x10 <sup>2</sup> | 3.06x10 <sup>1</sup> |
|                                                 | 6                 | 1.97x10 <sup>2</sup> | 1.80x10 <sup>2</sup> | 1.80x10 <sup>2</sup> | 2.30x10 <sup>2</sup> | 2.89x10 <sup>1</sup> |
|                                                 | 7                 | 1.60x10 <sup>2</sup> | 1.60x10 <sup>2</sup> | 1.40x10 <sup>2</sup> | 1.80x10 <sup>2</sup> | 2.00x10 <sup>1</sup> |
|                                                 | 8                 | 1.17x10 <sup>2</sup> | 1.20x10 <sup>2</sup> | 1.00x10 <sup>2</sup> | 1.30x10 <sup>2</sup> | 1.53x10 <sup>1</sup> |
| Actinomycetes                                   | 1                 | 1.00x10 <sup>1</sup> | 1.00x10 <sup>1</sup> | 1.00x10 <sup>1</sup> | 1.00x10 <sup>1</sup> | 0.00x10 <sup>0</sup> |
|                                                 | 2                 | 2.33x10 <sup>1</sup> | 2.00x10 <sup>1</sup> | 2.00x10 <sup>1</sup> | 3.00x10 <sup>1</sup> | 5.77x10 <sup>0</sup> |
|                                                 | 3                 | 4.67x10 <sup>1</sup> | 5.00x10 <sup>1</sup> | 4.00x10 <sup>1</sup> | 5.00x10 <sup>1</sup> | 5.77x10 <sup>0</sup> |
|                                                 | 4                 | 1.67x10 <sup>1</sup> | 2.00x10 <sup>1</sup> | 1.00x10 <sup>1</sup> | 2.00x10 <sup>1</sup> | 5.77x10 <sup>0</sup> |
|                                                 | 5                 | 1.33x10 <sup>1</sup> | 1.00x10 <sup>1</sup> | 1.00x10 <sup>1</sup> | 2.00x10 <sup>1</sup> | 5.77x10 <sup>0</sup> |
|                                                 | 6                 | 3.33x10 <sup>0</sup> | 0.00x10 <sup>0</sup> | 0.00x10 <sup>0</sup> | 1.00x10 <sup>1</sup> | 5.77x10 <sup>0</sup> |
|                                                 | 7                 | 0.00x10 <sup>0</sup> |
|                                                 | 8                 | 0.00x10 <sup>0</sup> |
| Mannitol-positive<br><i>Staphylococcus</i> spp. | 1                 | 1.00x10 <sup>1</sup> | 1.00x10 <sup>1</sup> | 0.00x10 <sup>0</sup> | 2.00x10 <sup>1</sup> | 1.00x10 <sup>1</sup> |
|                                                 | 2                 | 7.00x10 <sup>1</sup> | 6.00x10 <sup>1</sup> | 6.00x10 <sup>1</sup> | 9.00x10 <sup>1</sup> | 1.73x10 <sup>1</sup> |
|                                                 | 3                 | 6.67x10 <sup>0</sup> | 1.00x10 <sup>1</sup> | 0.00x10 <sup>0</sup> | 1.00x10 <sup>1</sup> | 5.77x10 <sup>0</sup> |
|                                                 | 4                 | 6.67x10 <sup>0</sup> | 1.00x10 <sup>1</sup> | 0.00x10 <sup>0</sup> | 1.00x10 <sup>1</sup> | 5.77x10 <sup>0</sup> |
|                                                 | 5                 | 1.00x10 <sup>1</sup> | 1.00x10 <sup>1</sup> | 0.00x10 <sup>0</sup> | 2.00x10 <sup>1</sup> | 1.00x10 <sup>1</sup> |
|                                                 | 6                 | 1.33x10 <sup>1</sup> | 1.00x10 <sup>1</sup> | 1.00x10 <sup>1</sup> | 2.00x10 <sup>1</sup> | 5.77x10 <sup>0</sup> |
|                                                 | 7                 | 6.67x10 <sup>0</sup> | 1.00x10 <sup>1</sup> | 0.00x10 <sup>0</sup> | 1.00x10 <sup>1</sup> | 5.77x10 <sup>0</sup> |
|                                                 | 8                 | 1.33x10 <sup>1</sup> | 1.00x10 <sup>1</sup> | 1.00x10 <sup>1</sup> | 2.00x10 <sup>1</sup> | 5.77x10 <sup>0</sup> |
| Haemolytic<br><i>Staphylococcus</i>             | 1                 | 1.73x10 <sup>2</sup> | 1.70x10 <sup>2</sup> | 1.50x10 <sup>2</sup> | 2.00x10 <sup>2</sup> | 2.52x10 <sup>1</sup> |
|                                                 | 2                 | 1.03x10 <sup>2</sup> | 1.00x10 <sup>2</sup> | 1.00x10 <sup>2</sup> | 1.10x10 <sup>2</sup> | 5.77x10 <sup>0</sup> |

|                                |   |                      |                      |                      |                      |                      |
|--------------------------------|---|----------------------|----------------------|----------------------|----------------------|----------------------|
|                                | 3 | 1.13x10 <sup>2</sup> | 1.10x10 <sup>2</sup> | 8.00x10 <sup>1</sup> | 1.50x10 <sup>2</sup> | 3.51x10 <sup>1</sup> |
|                                | 4 | 9.33x10 <sup>1</sup> | 9.00x10 <sup>1</sup> | 9.00x10 <sup>1</sup> | 1.00x10 <sup>2</sup> | 5.77x10 <sup>0</sup> |
|                                | 5 | 8.00x10 <sup>1</sup> | 6.00x10 <sup>1</sup> | 6.00x10 <sup>1</sup> | 1.20x10 <sup>2</sup> | 3.46x10 <sup>1</sup> |
|                                | 6 | 3.33x10 <sup>1</sup> | 3.00x10 <sup>1</sup> | 0.00x10 <sup>0</sup> | 7.00x10 <sup>1</sup> | 3.51x10 <sup>1</sup> |
|                                | 7 | 3.33x10 <sup>1</sup> | 3.00x10 <sup>1</sup> | 0.00x10 <sup>0</sup> | 7.00x10 <sup>1</sup> | 3.51x10 <sup>1</sup> |
|                                | 8 | 6.67x10 <sup>0</sup> | 1.00x10 <sup>1</sup> | 0.00x10 <sup>0</sup> | 1.00x10 <sup>1</sup> | 5.77x10 <sup>0</sup> |
| <i>Enterobacteriaceae</i>      | 1 | 1.33x10 <sup>2</sup> | 1.30x10 <sup>2</sup> | 1.30x10 <sup>2</sup> | 1.40x10 <sup>2</sup> | 5.77x10 <sup>0</sup> |
|                                | 2 | 3.00x10 <sup>1</sup> | 3.00x10 <sup>1</sup> | 2.00x10 <sup>1</sup> | 4.00x10 <sup>1</sup> | 1.00x10 <sup>1</sup> |
|                                | 3 | 9.33x10 <sup>1</sup> | 9.00x10 <sup>1</sup> | 9.00x10 <sup>1</sup> | 1.00x10 <sup>2</sup> | 5.77x10 <sup>0</sup> |
|                                | 4 | 1.50x10 <sup>2</sup> | 1.50x10 <sup>2</sup> | 1.00x10 <sup>2</sup> | 2.00x10 <sup>2</sup> | 5.00x10 <sup>1</sup> |
|                                | 5 | 3.13x10 <sup>2</sup> | 3.10x10 <sup>2</sup> | 3.00x10 <sup>2</sup> | 3.30x10 <sup>2</sup> | 1.53x10 <sup>1</sup> |
|                                | 6 | 1.57x10 <sup>2</sup> | 1.50x10 <sup>2</sup> | 1.00x10 <sup>2</sup> | 2.20x10 <sup>2</sup> | 6.03x10 <sup>1</sup> |
|                                | 7 | 1.73x10 <sup>2</sup> | 1.70x10 <sup>2</sup> | 1.60x10 <sup>2</sup> | 1.90x10 <sup>2</sup> | 1.53x10 <sup>1</sup> |
|                                | 8 | 0.00x10 <sup>0</sup> |
| <i>Pseudomonas fluorescens</i> | 1 | 0.00x10 <sup>0</sup> |
|                                | 2 | 0.00x10 <sup>0</sup> |
|                                | 3 | 0.00x10 <sup>0</sup> |
|                                | 4 | 0.00x10 <sup>0</sup> |
|                                | 5 | 0.00x10 <sup>0</sup> |
|                                | 6 | 0.00x10 <sup>0</sup> |
|                                | 7 | 1.33x10 <sup>1</sup> | 1.00x10 <sup>1</sup> | 1.00x10 <sup>1</sup> | 2.00x10 <sup>1</sup> | 5.77x10 <sup>0</sup> |
|                                | 8 | 0.00x10 <sup>0</sup> |
