# Supplementary material for: Uncontrolled Post-Industrial Landfill—Source of Metals, Potential Toxic Compounds, Dust, and Pathogens in Environment—A Case Study
Source: Molecules. 2024 Mar 27;29(7):1496. doi: 10.3390/molecules29071496 (PMC11013361; doi:10.3390/molecules29071496)
Supplement: Supplementary file 1 [file molecules-29-01496-s001.zip › Table S5.xlsx]

## Sheet: 16S Air
Air: Phylum				Air: Class				Air: Order				Air: Genus
Phylum	Taxonomy	Abundance [%]		Class (Aggregated)	Taxonomy	Abundance [%]		Order (Aggregated)	Taxonomy	Abundance [%]		Genus (Aggregated)	Taxonomy	Abundance [%]
Actinobacteria	Bacteria; Actinobacteria	94.2301		Actinobacteria	Bacteria; Actinobacteria; Actinobacteria	94.2233		Micrococcales	Bacteria; Actinobacteria; Actinobacteria; Micrococcales	94.167		Cellulosimicrobium	Bacteria; Actinobacteria; Actinobacteria; Micrococcales; Promicromonosporaceae; Cellulosimicrobium	94.0854
Proteobacteria	Bacteria; Proteobacteria	4.86374		Gammaproteobacteria	Bacteria; Proteobacteria; Gammaproteobacteria	4.12272		Xanthomonadales	Bacteria; Proteobacteria; Gammaproteobacteria; Xanthomonadales	3.91391		Stenotrophomonas	Bacteria; Proteobacteria; Gammaproteobacteria; Xanthomonadales; Xanthomonadaceae; Stenotrophomonas	3.90809
Cyanobacteria	Bacteria; Cyanobacteria	0.579803		Alphaproteobacteria	Bacteria; Proteobacteria; Alphaproteobacteria	0.733252		Chloroplast	Bacteria; Cyanobacteria; Oxyphotobacteria; Chloroplast	0.573005		Carya cathayensis	Bacteria; Cyanobacteria; Oxyphotobacteria; Chloroplast; Carya cathayensis; Carya cathayensis	0.503079
Firmicutes	Bacteria; Firmicutes	0.132082		Oxyphotobacteria	Bacteria; Cyanobacteria; Oxyphotobacteria	0.577861		Sphingomonadales	Bacteria; Proteobacteria; Alphaproteobacteria; Sphingomonadales	0.371967		Sphingomonas	Bacteria; Proteobacteria; Alphaproteobacteria; Sphingomonadales; Sphingomonadaceae; Sphingomonas	0.364198
Ambiguous_taxa	Bacteria; Ambiguous_taxa	0.0971194		Ambiguous_taxa	Bacteria; Ambiguous_taxa; Ambiguous_taxa	0.0971194		Rickettsiales	Bacteria; Proteobacteria; Alphaproteobacteria; Rickettsiales	0.30107		Avena sativa (oat)	Bacteria; Proteobacteria; Alphaproteobacteria; Rickettsiales; Mitochondria; Avena sativa (oat)	0.283589
Bacteroidetes	Bacteria; Bacteroidetes	0.0874075		Bacteroidia	Bacteria; Bacteroidetes; Bacteroidia	0.0835227		Ambiguous_taxa	Bacteria; Ambiguous_taxa; Ambiguous_taxa; Ambiguous_taxa	0.0971194		Ambiguous_taxa-04	Bacteria; Ambiguous_taxa; Ambiguous_taxa; Ambiguous_taxa; Ambiguous_taxa; Ambiguous_taxa	0.0971194
Chloroflexi	Bacteria; Chloroflexi	0.00388478		Bacilli	Bacteria; Firmicutes; Bacilli	0.0835227		Betaproteobacteriales	Bacteria; Proteobacteria; Gammaproteobacteria; Betaproteobacteriales	0.0912923		Escherichia-Shigella	Bacteria; Proteobacteria; Gammaproteobacteria; Enterobacteriales; Enterobacteriaceae; Escherichia-Shigella	0.0825515
Patescibacteria	Bacteria; Patescibacteria	0.00194239		Clostridia	Bacteria; Firmicutes; Clostridia	0.0446749		Enterobacteriales	Bacteria; Proteobacteria; Gammaproteobacteria; Enterobacteriales	0.0893499		Uncultured-10	Bacteria; Proteobacteria; Gammaproteobacteria; Betaproteobacteriales; Neisseriaceae; Uncultured	0.0563293
Planctomycetes	Bacteria; Planctomycetes	0.00194239		Deltaproteobacteria	Bacteria; Proteobacteria; Deltaproteobacteria	0.00776955		Bacillales	Bacteria; Firmicutes; Bacilli; Bacillales	0.0640988		Microbacterium	Bacteria; Actinobacteria; Actinobacteria; Micrococcales; Microbacteriaceae; Microbacterium	0.0466173
Verrucomicrobia	Bacteria; Verrucomicrobia	0.00194239		Acidimicrobiia	Bacteria; Actinobacteria; Acidimicrobiia	0.00485597		Clostridiales	Bacteria; Firmicutes; Clostridia; Clostridiales	0.0446749		Uncultured bacterium-05	Bacteria; Cyanobacteria; Oxyphotobacteria; Chloroplast; Uncultured bacterium; Uncultured bacterium	0.0446749
				Chloroflexia	Bacteria; Chloroflexi; Chloroflexia	0.00388478		Cytophagales	Bacteria; Bacteroidetes; Bacteroidia; Cytophagales	0.0437037		Hymenobacter	Bacteria; Bacteroidetes; Bacteroidia; Cytophagales; Hymenobacteraceae; Hymenobacter	0.0378766
				Thermoleophilia	Bacteria; Actinobacteria; Thermoleophilia	0.00194239		Propionibacteriales	Bacteria; Actinobacteria; Actinobacteria; Propionibacteriales	0.034963		Cutibacterium	Bacteria; Actinobacteria; Actinobacteria; Propionibacteriales; Propionibacteriaceae; Cutibacterium	0.034963
				Ignavibacteria	Bacteria; Bacteroidetes; Ignavibacteria	0.00194239		Rhizobiales	Bacteria; Proteobacteria; Alphaproteobacteria; Rhizobiales	0.0291358		Staphylococcus	Bacteria; Firmicutes; Bacilli; Bacillales; Staphylococcaceae; Staphylococcus	0.0310782
				Rhodothermia	Bacteria; Bacteroidetes; Rhodothermia	0.00194239		Rhodobacterales	Bacteria; Proteobacteria; Alphaproteobacteria; Rhodobacterales	0.0233087		Massilia	Bacteria; Proteobacteria; Gammaproteobacteria; Betaproteobacteriales; Burkholderiaceae; Massilia	0.0233087
				Melainabacteria	Bacteria; Cyanobacteria; Melainabacteria	0.00194239		Pseudomonadales	Bacteria; Proteobacteria; Gammaproteobacteria; Pseudomonadales	0.0223375		Prevotella 9	Bacteria; Bacteroidetes; Bacteroidia; Bacteroidales; Prevotellaceae; Prevotella 9	0.0203951
				Erysipelotrichia	Bacteria; Firmicutes; Erysipelotrichia	0.00194239		Bacteroidales	Bacteria; Bacteroidetes; Bacteroidia; Bacteroidales	0.0203951		Paracoccus	Bacteria; Proteobacteria; Alphaproteobacteria; Rhodobacterales; Rhodobacteraceae; Paracoccus	0.0194239
				Negativicutes	Bacteria; Firmicutes; Negativicutes	0.00194239		Lactobacillales	Bacteria; Firmicutes; Bacilli; Lactobacillales	0.0194239		Methylobacterium	Bacteria; Proteobacteria; Alphaproteobacteria; Rhizobiales; Beijerinckiaceae; Methylobacterium	0.0155391
				Saccharimonadia	Bacteria; Patescibacteria; Saccharimonadia	0.00194239		Flavobacteriales	Bacteria; Bacteroidetes; Bacteroidia; Flavobacteriales	0.00971194		Bacillus	Bacteria; Firmicutes; Bacilli; Bacillales; Bacillaceae; Bacillus	0.0135967
				Phycisphaerae	Bacteria; Planctomycetes; Phycisphaerae	0.00194239		Sphingobacteriales	Bacteria; Bacteroidetes; Bacteroidia; Sphingobacteriales	0.00971194		Planococcus	Bacteria; Firmicutes; Bacilli; Bacillales; Planococcaceae; Planococcus	0.0135967
				Verrucomicrobiae	Bacteria; Verrucomicrobia; Verrucomicrobiae	0.00194239		Kineosporiales	Bacteria; Actinobacteria; Actinobacteria; Kineosporiales	0.00874075		Lactobacillus	Bacteria; Firmicutes; Bacilli; Lactobacillales; Lactobacillaceae; Lactobacillus	0.0135967
								Corynebacteriales	Bacteria; Actinobacteria; Actinobacteria; Corynebacteriales	0.00582717		Acinetobacter	Bacteria; Proteobacteria; Gammaproteobacteria; Pseudomonadales; Moraxellaceae; Acinetobacter	0.0135967
								Acetobacterales	Bacteria; Proteobacteria; Alphaproteobacteria; Acetobacterales	0.00582717		Kocuria	Bacteria; Actinobacteria; Actinobacteria; Micrococcales; Micrococcaceae; Kocuria	0.0116543
								Myxococcales	Bacteria; Proteobacteria; Deltaproteobacteria; Myxococcales	0.00582717		Tectona grandis	Bacteria; Cyanobacteria; Oxyphotobacteria; Chloroplast; Tectona grandis; Tectona grandis	0.0116543
								Microtrichales	Bacteria; Actinobacteria; Acidimicrobiia; Microtrichales	0.00485597		Faecalibacterium	Bacteria; Firmicutes; Clostridia; Clostridiales; Ruminococcaceae; Faecalibacterium	0.00971194
								Nostocales	Bacteria; Cyanobacteria; Oxyphotobacteria; Nostocales	0.00485597		Pseudomonas	Bacteria; Proteobacteria; Gammaproteobacteria; Pseudomonadales; Pseudomonadaceae; Pseudomonas	0.00874075
								Bifidobacteriales	Bacteria; Actinobacteria; Actinobacteria; Bifidobacteriales	0.00291358		Cellulomonas	Bacteria; Actinobacteria; Actinobacteria; Micrococcales; Cellulomonadaceae; Cellulomonas	0.00776955
								Actinomycetales	Bacteria; Actinobacteria; Actinobacteria; Actinomycetales	0.00194239		Pedobacter	Bacteria; Bacteroidetes; Bacteroidia; Sphingobacteriales; Sphingobacteriaceae; Pedobacter	0.00776955
								Pseudonocardiales	Bacteria; Actinobacteria; Actinobacteria; Pseudonocardiales	0.00194239		Allorhizobium-Neorhizobium-Pararhizobium-Rhizobium	Bacteria; Proteobacteria; Alphaproteobacteria; Rhizobiales; Rhizobiaceae; Allorhizobium-Neorhizobium-Pararhizobium-Rhizobium	0.00776955
								Solirubrobacterales	Bacteria; Actinobacteria; Thermoleophilia; Solirubrobacterales	0.00194239		Ambiguous_taxa-07	Bacteria; Proteobacteria; Gammaproteobacteria; Betaproteobacteriales; Burkholderiaceae; Ambiguous_taxa	0.00776955
								OPB56	Bacteria; Bacteroidetes; Ignavibacteria; OPB56	0.00194239		Kineococcus	Bacteria; Actinobacteria; Actinobacteria; Kineosporiales; Kineosporiaceae; Kineococcus	0.00679836
								Rhodothermales	Bacteria; Bacteroidetes; Rhodothermia; Rhodothermales	0.00194239		Curtobacterium	Bacteria; Actinobacteria; Actinobacteria; Micrococcales; Microbacteriaceae; Curtobacterium	0.00582717
								Kallotenuales	Bacteria; Chloroflexi; Chloroflexia; Kallotenuales	0.00194239		Chryseobacterium	Bacteria; Bacteroidetes; Bacteroidia; Flavobacteriales; Weeksellaceae; Chryseobacterium	0.00582717
								Thermomicrobiales	Bacteria; Chloroflexi; Chloroflexia; Thermomicrobiales	0.00194239		Ambiguous_taxa-05	Bacteria; Cyanobacteria; Oxyphotobacteria; Chloroplast; Ambiguous_taxa; Ambiguous_taxa	0.00582717
								Vampirovibrionales	Bacteria; Cyanobacteria; Melainabacteria; Vampirovibrionales	0.00194239		Ambiguous_taxa-06	Bacteria; Proteobacteria; Alphaproteobacteria; Rickettsiales; Mitochondria; Ambiguous_taxa	0.00582717
								Erysipelotrichales	Bacteria; Firmicutes; Erysipelotrichia; Erysipelotrichales	0.00194239		Romboutsia	Bacteria; Firmicutes; Clostridia; Clostridiales; Peptostreptococcaceae; Romboutsia	0.00485597
								Selenomonadales	Bacteria; Firmicutes; Negativicutes; Selenomonadales	0.00194239		Ambiguous_taxa-08	Bacteria; Proteobacteria; Gammaproteobacteria; Enterobacteriales; Enterobacteriaceae; Ambiguous_taxa	0.00485597
								Saccharimonadales	Bacteria; Patescibacteria; Saccharimonadia; Saccharimonadales	0.00194239		Corynebacterium 1	Bacteria; Actinobacteria; Actinobacteria; Corynebacteriales; Corynebacteriaceae; Corynebacterium 1	0.00388478
								Tepidisphaerales	Bacteria; Planctomycetes; Phycisphaerae; Tepidisphaerales	0.00194239		Uncultured bacterium-01	Bacteria; Bacteroidetes; Bacteroidia; Cytophagales; Spirosomaceae; Uncultured bacterium	0.00388478
								Caulobacterales	Bacteria; Proteobacteria; Alphaproteobacteria; Caulobacterales	0.00194239		{Unknown Genus} Mitochondria	Bacteria; Proteobacteria; Alphaproteobacteria; Rickettsiales; Mitochondria;	0.00388478
								Oligoflexales	Bacteria; Proteobacteria; Deltaproteobacteria; Oligoflexales	0.00194239		Novosphingobium	Bacteria; Proteobacteria; Alphaproteobacteria; Sphingomonadales; Sphingomonadaceae; Novosphingobium	0.00388478
								Alteromonadales	Bacteria; Proteobacteria; Gammaproteobacteria; Alteromonadales	0.00194239		Uncultured bacterium-07	Bacteria; Proteobacteria; Deltaproteobacteria; Myxococcales; P3OB-42; Uncultured bacterium	0.00388478
								Gammaproteobacteria Incertae Sedis	Bacteria; Proteobacteria; Gammaproteobacteria; Gammaproteobacteria Incertae Sedis	0.00194239		{Unknown Genus} Xanthomonadaceae	Bacteria; Proteobacteria; Gammaproteobacteria; Xanthomonadales; Xanthomonadaceae;	0.00388478
								Pasteurellales	Bacteria; Proteobacteria; Gammaproteobacteria; Pasteurellales	0.00194239		Iamia	Bacteria; Actinobacteria; Acidimicrobiia; Microtrichales; Iamiaceae; Iamia	0.00291358
								Verrucomicrobiales	Bacteria; Verrucomicrobia; Verrucomicrobiae; Verrucomicrobiales	0.00194239		Bifidobacterium	Bacteria; Actinobacteria; Actinobacteria; Bifidobacteriales; Bifidobacteriaceae; Bifidobacterium	0.00291358
												Uncultured-05	Bacteria; Cyanobacteria; Oxyphotobacteria; Nostocales; Chroococcidiopsaceae; Uncultured	0.00291358
												Clostridium sensu stricto 1	Bacteria; Firmicutes; Clostridia; Clostridiales; Clostridiaceae 1; Clostridium sensu stricto 1	0.00291358
												Uncultured-01	Bacteria; Actinobacteria; Acidimicrobiia; Microtrichales; Ilumatobacteraceae; Uncultured	0.00194239
												Actinomyces	Bacteria; Actinobacteria; Actinobacteria; Actinomycetales; Actinomycetaceae; Actinomyces	0.00194239
												Rhodococcus	Bacteria; Actinobacteria; Actinobacteria; Corynebacteriales; Nocardiaceae; Rhodococcus	0.00194239
												Ambiguous_taxa-01	Bacteria; Actinobacteria; Actinobacteria; Kineosporiales; Kineosporiaceae; Ambiguous_taxa	0.00194239
												Ambiguous_taxa-02	Bacteria; Actinobacteria; Actinobacteria; Micrococcales; Ambiguous_taxa; Ambiguous_taxa	0.00194239
												Brevibacterium	Bacteria; Actinobacteria; Actinobacteria; Micrococcales; Brevibacteriaceae; Brevibacterium	0.00194239
												Tetrasphaera	Bacteria; Actinobacteria; Actinobacteria; Micrococcales; Intrasporangiaceae; Tetrasphaera	0.00194239
												Frondihabitans	Bacteria; Actinobacteria; Actinobacteria; Micrococcales; Microbacteriaceae; Frondihabitans	0.00194239
												Leifsonia	Bacteria; Actinobacteria; Actinobacteria; Micrococcales; Microbacteriaceae; Leifsonia	0.00194239
												Ambiguous_taxa-03	Bacteria; Actinobacteria; Actinobacteria; Pseudonocardiales; Pseudonocardiaceae; Ambiguous_taxa	0.00194239
												Uncultured-02	Bacteria; Actinobacteria; Thermoleophilia; Solirubrobacterales; Solirubrobacteraceae; Uncultured	0.00194239
												Uncultured-03	Bacteria; Bacteroidetes; Bacteroidia; Cytophagales; Spirosomaceae; Uncultured	0.00194239
												Flavobacterium	Bacteria; Bacteroidetes; Bacteroidia; Flavobacteriales; Flavobacteriaceae; Flavobacterium	0.00194239
												Cloacibacterium	Bacteria; Bacteroidetes; Bacteroidia; Flavobacteriales; Weeksellaceae; Cloacibacterium	0.00194239
												Mucilaginibacter	Bacteria; Bacteroidetes; Bacteroidia; Sphingobacteriales; Sphingobacteriaceae; Mucilaginibacter	0.00194239
												Uncultured bacterium-02	Bacteria; Bacteroidetes; Ignavibacteria; OPB56; Uncultured bacterium; Uncultured bacterium	0.00194239
												Uncultured-04	Bacteria; Bacteroidetes; Rhodothermia; Rhodothermales; Rhodothermaceae; Uncultured	0.00194239
												Uncultured bacterium-03	Bacteria; Chloroflexi; Chloroflexia; Kallotenuales; AKIW781; Uncultured bacterium	0.00194239
												Uncultured bacterium-04	Bacteria; Chloroflexi; Chloroflexia; Thermomicrobiales; JG30-KF-CM45; Uncultured bacterium	0.00194239
												Metagenome	Bacteria; Cyanobacteria; Melainabacteria; Vampirovibrionales; Metagenome; Metagenome	0.00194239
												Elodea nuttallii	Bacteria; Cyanobacteria; Oxyphotobacteria; Chloroplast; Elodea nuttallii; Elodea nuttallii	0.00194239
												Rubus hybrid cultivar	Bacteria; Cyanobacteria; Oxyphotobacteria; Chloroplast; Rubus hybrid cultivar; Rubus hybrid cultivar	0.00194239
												Solanum melongena (eggplant)	Bacteria; Cyanobacteria; Oxyphotobacteria; Chloroplast; Solanum melongena (eggplant); Solanum melongena (eggplant)	0.00194239
												Uncultured eukaryote	Bacteria; Cyanobacteria; Oxyphotobacteria; Chloroplast; Uncultured eukaryote; Uncultured eukaryote	0.00194239
												Aliterella CENA595	Bacteria; Cyanobacteria; Oxyphotobacteria; Nostocales; Chroococcidiopsaceae; Aliterella CENA595	0.00194239
												Alteribacillus	Bacteria; Firmicutes; Bacilli; Bacillales; Bacillaceae; Alteribacillus	0.00194239
												Exiguobacterium	Bacteria; Firmicutes; Bacilli; Bacillales; Family XII; Exiguobacterium	0.00194239
												Alkalicoccus	Bacteria; Firmicutes; Bacilli; Bacillales; Sporolactobacillaceae; Alkalicoccus	0.00194239
												Aerococcus	Bacteria; Firmicutes; Bacilli; Lactobacillales; Aerococcaceae; Aerococcus	0.00194239
												Leuconostoc	Bacteria; Firmicutes; Bacilli; Lactobacillales; Leuconostocaceae; Leuconostoc	0.00194239
												Streptococcus	Bacteria; Firmicutes; Bacilli; Lactobacillales; Streptococcaceae; Streptococcus	0.00194239
												Anaerococcus	Bacteria; Firmicutes; Clostridia; Clostridiales; Family XI; Anaerococcus	0.00194239
												[Eubacterium] eligens group	Bacteria; Firmicutes; Clostridia; Clostridiales; Lachnospiraceae; [Eubacterium] eligens group	0.00194239
												[Ruminococcus] torques group	Bacteria; Firmicutes; Clostridia; Clostridiales; Lachnospiraceae; [Ruminococcus] torques group	0.00194239
												Agathobacter	Bacteria; Firmicutes; Clostridia; Clostridiales; Lachnospiraceae; Agathobacter	0.00194239
												Anaerosporobacter	Bacteria; Firmicutes; Clostridia; Clostridiales; Lachnospiraceae; Anaerosporobacter	0.00194239
												Blautia	Bacteria; Firmicutes; Clostridia; Clostridiales; Lachnospiraceae; Blautia	0.00194239
												Lachnospiraceae UCG-008	Bacteria; Firmicutes; Clostridia; Clostridiales; Lachnospiraceae; Lachnospiraceae UCG-008	0.00194239
												Shuttleworthia	Bacteria; Firmicutes; Clostridia; Clostridiales; Lachnospiraceae; Shuttleworthia	0.00194239
												{Unknown Genus} Ruminococcaceae	Bacteria; Firmicutes; Clostridia; Clostridiales; Ruminococcaceae;	0.00194239
												Fournierella	Bacteria; Firmicutes; Clostridia; Clostridiales; Ruminococcaceae; Fournierella	0.00194239
												Oscillibacter	Bacteria; Firmicutes; Clostridia; Clostridiales; Ruminococcaceae; Oscillibacter	0.00194239
												Ruminococcaceae UCG-002	Bacteria; Firmicutes; Clostridia; Clostridiales; Ruminococcaceae; Ruminococcaceae UCG-002	0.00194239
												Ruminococcaceae UCG-013	Bacteria; Firmicutes; Clostridia; Clostridiales; Ruminococcaceae; Ruminococcaceae UCG-013	0.00194239
												Ruminococcus 2	Bacteria; Firmicutes; Clostridia; Clostridiales; Ruminococcaceae; Ruminococcus 2	0.00194239
												Turicibacter	Bacteria; Firmicutes; Erysipelotrichia; Erysipelotrichales; Erysipelotrichaceae; Turicibacter	0.00194239
												Phascolarctobacterium	Bacteria; Firmicutes; Negativicutes; Selenomonadales; Acidaminococcaceae; Phascolarctobacterium	0.00194239
												Uncultured Candidatus Saccharibacteria bacterium	Bacteria; Patescibacteria; Saccharimonadia; Saccharimonadales; Uncultured Candidatus Saccharibacteria bacterium; Uncultured Candidatus Saccharibacteria bacterium	0.00194239
												Tepidisphaera	Bacteria; Planctomycetes; Phycisphaerae; Tepidisphaerales; Tepidisphaeraceae; Tepidisphaera	0.00194239
												Acidiphilium	Bacteria; Proteobacteria; Alphaproteobacteria; Acetobacterales; Acetobacteraceae; Acidiphilium	0.00194239
												Craurococcus	Bacteria; Proteobacteria; Alphaproteobacteria; Acetobacterales; Acetobacteraceae; Craurococcus	0.00194239
												Uncultured-06	Bacteria; Proteobacteria; Alphaproteobacteria; Acetobacterales; Acetobacteraceae; Uncultured	0.00194239
												Brevundimonas	Bacteria; Proteobacteria; Alphaproteobacteria; Caulobacterales; Caulobacteraceae; Brevundimonas	0.00194239
												1174-901-12	Bacteria; Proteobacteria; Alphaproteobacteria; Rhizobiales; Beijerinckiaceae; 1174-901-12	0.00194239
												Microvirga	Bacteria; Proteobacteria; Alphaproteobacteria; Rhizobiales; Beijerinckiaceae; Microvirga	0.00194239
												Devosia	Bacteria; Proteobacteria; Alphaproteobacteria; Rhizobiales; Devosiaceae; Devosia	0.00194239
												Pseudorhodobacter	Bacteria; Proteobacteria; Alphaproteobacteria; Rhodobacterales; Rhodobacteraceae; Pseudorhodobacter	0.00194239
												Uncultured-07	Bacteria; Proteobacteria; Alphaproteobacteria; Rhodobacterales; Rhodobacteraceae; Uncultured	0.00194239
												Plantago lanceolata (narrow-leaved plantain)	Bacteria; Proteobacteria; Alphaproteobacteria; Rickettsiales; Mitochondria; Plantago lanceolata (narrow-leaved plantain)	0.00194239
												Uncultured bacterium-06	Bacteria; Proteobacteria; Alphaproteobacteria; Rickettsiales; Mitochondria; Uncultured bacterium	0.00194239
												Candidatus Trichorickettsia	Bacteria; Proteobacteria; Alphaproteobacteria; Rickettsiales; Rickettsiaceae; Candidatus Trichorickettsia	0.00194239
												Uncultured-08	Bacteria; Proteobacteria; Alphaproteobacteria; Rickettsiales; Rickettsiaceae; Uncultured	0.00194239
												Altererythrobacter	Bacteria; Proteobacteria; Alphaproteobacteria; Sphingomonadales; Sphingomonadaceae; Altererythrobacter	0.00194239
												Uncultured-09	Bacteria; Proteobacteria; Alphaproteobacteria; Sphingomonadales; Sphingomonadaceae; Uncultured	0.00194239
												Cystobacter	Bacteria; Proteobacteria; Deltaproteobacteria; Myxococcales; Archangiaceae; Cystobacter	0.00194239
												Oligoflexus	Bacteria; Proteobacteria; Deltaproteobacteria; Oligoflexales; Oligoflexaceae; Oligoflexus	0.00194239
												Rheinheimera	Bacteria; Proteobacteria; Gammaproteobacteria; Alteromonadales; Alteromonadaceae; Rheinheimera	0.00194239
												Noviherbaspirillum	Bacteria; Proteobacteria; Gammaproteobacteria; Betaproteobacteriales; Burkholderiaceae; Noviherbaspirillum	0.00194239
												Parasutterella	Bacteria; Proteobacteria; Gammaproteobacteria; Betaproteobacteriales; Burkholderiaceae; Parasutterella	0.00194239
												Pantoea	Bacteria; Proteobacteria; Gammaproteobacteria; Enterobacteriales; Enterobacteriaceae; Pantoea	0.00194239
												Candidatus Ovatusbacter	Bacteria; Proteobacteria; Gammaproteobacteria; Gammaproteobacteria Incertae Sedis; Unknown Family; Candidatus Ovatusbacter	0.00194239
												Haemophilus	Bacteria; Proteobacteria; Gammaproteobacteria; Pasteurellales; Pasteurellaceae; Haemophilus	0.00194239
												Thermomonas	Bacteria; Proteobacteria; Gammaproteobacteria; Xanthomonadales; Xanthomonadaceae; Thermomonas	0.00194239
												Akkermansia	Bacteria; Verrucomicrobia; Verrucomicrobiae; Verrucomicrobiales; Akkermansiaceae; Akkermansia	0.00194239

## Sheet: 16S Leachate
Leachate: Phylum				Leachate: Class				Leachate: Order				Leachate: Genus
Phylum (Aggregated)	Taxonomy	Abundance [%]		Class (Aggregated)	Taxonomy	Abundance [%]		Order (Aggregated)	Taxonomy	Abundance [%]		Genus (Aggregated)	Taxonomy	Abundance [%]
Proteobacteria	k__Bacteria, p__Proteobacteria	64.9782		Gammaproteobacteria	k__Bacteria, p__Proteobacteria, c__Gammaproteobacteria	57.9112		Pseudomonadales	k__Bacteria, p__Proteobacteria, c__Gammaproteobacteria, o__Pseudomonadales	50.8228		Acinetobacter	k__Bacteria, p__Proteobacteria, c__Gammaproteobacteria, o__Pseudomonadales, f__Moraxellaceae, g__Acinetobacter	45.3964
Firmicutes	k__Bacteria, p__Firmicutes	33.7241		Clostridia	k__Bacteria, p__Firmicutes, c__Clostridia	31.6119		Clostridiales	k__Bacteria, p__Firmicutes, c__Clostridia, o__Clostridiales	31.6086		Proteiniclasticum	k__Bacteria, p__Firmicutes, c__Clostridia, o__Clostridiales, f__Clostridiaceae, g__Proteiniclasticum	13.4959
Bacteroidetes	k__Bacteria, p__Bacteroidetes	0.890384		Betaproteobacteria	k__Bacteria, p__Proteobacteria, c__Betaproteobacteria	4.34309		Alteromonadales	k__Bacteria, p__Proteobacteria, c__Gammaproteobacteria, o__Alteromonadales	6.73064		Caloramator	k__Bacteria, p__Firmicutes, c__Clostridia, o__Clostridiales, f__Clostridiaceae, g__Caloramator	8.02994
Synergistetes	k__Bacteria, p__Synergistetes	0.199512		Epsilonproteobacteria	k__Bacteria, p__Proteobacteria, c__Epsilonproteobacteria	2.56727		Burkholderiales	k__Bacteria, p__Proteobacteria, c__Betaproteobacteria, o__Burkholderiales	2.68764		Shewanella	k__Bacteria, p__Proteobacteria, c__Gammaproteobacteria, o__Alteromonadales, f__Shewanellaceae, g__Shewanella	6.72075
Actinobacteria	k__Bacteria, p__Actinobacteria	0.174779		Bacilli	k__Bacteria, p__Firmicutes, c__Bacilli	2.0182		Campylobacterales	k__Bacteria, p__Proteobacteria, c__Epsilonproteobacteria, o__Campylobacterales	2.56727		{Unknown Genus} Pseudomonadaceae	k__Bacteria, p__Proteobacteria, c__Gammaproteobacteria, o__Pseudomonadales, f__Pseudomonadaceae, g__	4.93833
Chrysiogenetes	k__Bacteria, p__Chrysiogenetes	0.0131909		Bacteroidia	k__Bacteria, p__Bacteroidetes, c__Bacteroidia	0.461681		Lactobacillales	k__Bacteria, p__Firmicutes, c__Bacilli, o__Lactobacillales	2.01491		{Unknown Genus} Lachnospiraceae	k__Bacteria, p__Firmicutes, c__Clostridia, o__Clostridiales, f__Lachnospiraceae, g__	3.13283
Verrucomicrobia	k__Bacteria, p__Verrucomicrobia	0.00659544		Flavobacteriia	k__Bacteria, p__Bacteroidetes, c__Flavobacteriia	0.428703		MKC10	k__Bacteria, p__Proteobacteria, c__Betaproteobacteria, o__MKC10	0.944796		{Unknown Genus} Comamonadaceae	k__Bacteria, p__Proteobacteria, c__Betaproteobacteria, o__Burkholderiales, f__Comamonadaceae, g__	2.08251
TM7	k__Bacteria, p__TM7	0.00329772		Synergistia	k__Bacteria, p__Synergistetes, c__Synergistia	0.199512		Rhodocyclales	k__Bacteria, p__Proteobacteria, c__Betaproteobacteria, o__Rhodocyclales	0.585345		{Unknown Genus} Carnobacteriaceae	k__Bacteria, p__Firmicutes, c__Bacilli, o__Lactobacillales, f__Carnobacteriaceae, g__	2.01161
WS6	k__Bacteria, p__WS6	0.00329772		Actinobacteria	k__Bacteria, p__Actinobacteria, c__Actinobacteria	0.146748		Bacteroidales	k__Bacteria, p__Bacteroidetes, c__Bacteroidia, o__Bacteroidales	0.461681		{Unknown Genus} Campylobacteraceae	k__Bacteria, p__Proteobacteria, c__Epsilonproteobacteria, o__Campylobacterales, f__Campylobacteraceae, g__	1.74779
Armatimonadetes	k__Bacteria, p__Armatimonadetes	0.00329772		Alphaproteobacteria	k__Bacteria, p__Proteobacteria, c__Alphaproteobacteria	0.140153		Flavobacteriales	k__Bacteria, p__Bacteroidetes, c__Flavobacteriia, o__Flavobacteriales	0.428703		{Unknown Genus} Peptostreptococcaceae	k__Bacteria, p__Firmicutes, c__Clostridia, o__Clostridiales, f__Peptostreptococcaceae, g__	1.70162
OP11	k__Bacteria, p__OP11	0.00329772		Erysipelotrichi	k__Bacteria, p__Firmicutes, c__Erysipelotrichi	0.093985		Aeromonadales	k__Bacteria, p__Proteobacteria, c__Gammaproteobacteria, o__Aeromonadales	0.234138		Clostridium-2	k__Bacteria, p__Firmicutes, c__Clostridia, o__Clostridiales, f__Peptostreptococcaceae, g__Clostridium	1.28941
				Coriobacteriia	k__Bacteria, p__Actinobacteria, c__Coriobacteriia	0.0197863		Synergistales	k__Bacteria, p__Synergistetes, c__Synergistia, o__Synergistales	0.199512		Fusibacter	k__Bacteria, p__Firmicutes, c__Clostridia, o__Clostridiales, f__[Acidaminobacteraceae], g__Fusibacter	1.17893
				Deltaproteobacteria	k__Bacteria, p__Proteobacteria, c__Deltaproteobacteria	0.0164886		Actinomycetales	k__Bacteria, p__Actinobacteria, c__Actinobacteria, o__Actinomycetales	0.146748		{Unknown Family} MKC10	k__Bacteria, p__Proteobacteria, c__Betaproteobacteria, o__MKC10, f__, g__	0.944796
				Chrysiogenetes	k__Bacteria, p__Chrysiogenetes, c__Chrysiogenetes	0.0131909		{Unknown Order} Betaproteobacteria	k__Bacteria, p__Proteobacteria, c__Betaproteobacteria, o__	0.125313		Tissierella_Soehngenia	k__Bacteria, p__Firmicutes, c__Clostridia, o__Clostridiales, f__[Tissierellaceae], g__Tissierella_Soehngenia	0.89533
				Verrucomicrobiae	k__Bacteria, p__Verrucomicrobia, c__Verrucomicrobiae	0.00659544		Erysipelotrichales	k__Bacteria, p__Firmicutes, c__Erysipelotrichi, o__Erysipelotrichales	0.093985		{Unknown Genus} JTB215	k__Bacteria, p__Firmicutes, c__Clostridia, o__Clostridiales, f__JTB215, g__	0.850811
				OPB41	k__Bacteria, p__Actinobacteria, c__OPB41	0.00659544		Rhizobiales	k__Bacteria, p__Proteobacteria, c__Alphaproteobacteria, o__Rhizobiales	0.0593589		Arcobacter	k__Bacteria, p__Proteobacteria, c__Epsilonproteobacteria, o__Campylobacterales, f__Campylobacteraceae, g__Arcobacter	0.774964
				TM7-3	k__Bacteria, p__TM7, c__TM7-3	0.00329772		Enterobacteriales	k__Bacteria, p__Proteobacteria, c__Gammaproteobacteria, o__Enterobacteriales	0.0593589		{Unknown Genus} Alcaligenaceae	k__Bacteria, p__Proteobacteria, c__Betaproteobacteria, o__Burkholderiales, f__Alcaligenaceae, g__	0.545772
				WCHB1-64	k__Bacteria, p__OP11, c__WCHB1-64	0.00329772		Rhodobacterales	k__Bacteria, p__Proteobacteria, c__Alphaproteobacteria, o__Rhodobacterales	0.0445192		Thauera	k__Bacteria, p__Proteobacteria, c__Betaproteobacteria, o__Rhodocyclales, f__Rhodocyclaceae, g__Thauera	0.511146
				SC72	k__Bacteria, p__WS6, c__SC72	0.00329772		Chromatiales	k__Bacteria, p__Proteobacteria, c__Gammaproteobacteria, o__Chromatiales	0.0362749		Clostridium-1	k__Bacteria, p__Firmicutes, c__Clostridia, o__Clostridiales, f__Clostridiaceae, g__Clostridium	0.5062
				SJA-176	k__Bacteria, p__Armatimonadetes, c__SJA-176	0.00329772		Caulobacterales	k__Bacteria, p__Proteobacteria, c__Alphaproteobacteria, o__Caulobacterales	0.0214352		Pseudomonas	k__Bacteria, p__Proteobacteria, c__Gammaproteobacteria, o__Pseudomonadales, f__Pseudomonadaceae, g__Pseudomonas	0.460032
				Thermoleophilia	k__Bacteria, p__Actinobacteria, c__Thermoleophilia	0.00164886		Coriobacteriales	k__Bacteria, p__Actinobacteria, c__Coriobacteriia, o__Coriobacteriales	0.0197863		{Unknown Genus} p-2534-18B5	k__Bacteria, p__Bacteroidetes, c__Bacteroidia, o__Bacteroidales, f__p-2534-18B5, g__	0.399024
								Oceanospirillales	k__Bacteria, p__Proteobacteria, c__Gammaproteobacteria, o__Oceanospirillales	0.0131909		Myroides	k__Bacteria, p__Bacteroidetes, c__Flavobacteriia, o__Flavobacteriales, f__Flavobacteriaceae, g__Myroides	0.306688
								Chrysiogenales	k__Bacteria, p__Chrysiogenetes, c__Chrysiogenetes, o__Chrysiogenales	0.0131909		{Unknown Family} Clostridiales	k__Bacteria, p__Firmicutes, c__Clostridia, o__Clostridiales, f__, g__	0.290199
								Desulfovibrionales	k__Bacteria, p__Proteobacteria, c__Deltaproteobacteria, o__Desulfovibrionales	0.0131909		{Unknown Genus} Aeromonadaceae	k__Bacteria, p__Proteobacteria, c__Gammaproteobacteria, o__Aeromonadales, f__Aeromonadaceae, g__	0.234138
								{Unknown Order} Gammaproteobacteria	k__Bacteria, p__Proteobacteria, c__Gammaproteobacteria, o__	0.011542		vadinCA02	k__Bacteria, p__Synergistetes, c__Synergistia, o__Synergistales, f__Synergistaceae, g__vadinCA02	0.192917
								Sphingomonadales	k__Bacteria, p__Proteobacteria, c__Alphaproteobacteria, o__Sphingomonadales	0.00989315		{Unknown Order} Betaproteobacteria	k__Bacteria, p__Proteobacteria, c__Betaproteobacteria, o__, f__, g__	0.125313
								Verrucomicrobiales	k__Bacteria, p__Verrucomicrobia, c__Verrucomicrobiae, o__Verrucomicrobiales	0.00659544		{Unknown Genus} Flavobacteriaceae	k__Bacteria, p__Bacteroidetes, c__Flavobacteriia, o__Flavobacteriales, f__Flavobacteriaceae, g__	0.105527
								{Unknown Order} OPB41	k__Bacteria, p__Actinobacteria, c__OPB41, o__	0.00659544		{Unknown Genus} Erysipelotrichaceae	k__Bacteria, p__Firmicutes, c__Erysipelotrichi, o__Erysipelotrichales, f__Erysipelotrichaceae, g__	0.093985
								Bacillales	k__Bacteria, p__Firmicutes, c__Bacilli, o__Bacillales	0.00329772		{Unknown Genus} Streptomycetaceae	k__Bacteria, p__Actinobacteria, c__Actinobacteria, o__Actinomycetales, f__Streptomycetaceae, g__	0.0692521
								{Unknown Order} TM7-3	k__Bacteria, p__TM7, c__TM7-3, o__	0.00329772		Dechloromonas	k__Bacteria, p__Proteobacteria, c__Betaproteobacteria, o__Rhodocyclales, f__Rhodocyclaceae, g__Dechloromonas	0.0610078
								Rickettsiales	k__Bacteria, p__Proteobacteria, c__Alphaproteobacteria, o__Rickettsiales	0.00329772		{Unknown Genus} Enterobacteriaceae	k__Bacteria, p__Proteobacteria, c__Gammaproteobacteria, o__Enterobacteriales, f__Enterobacteriaceae, g__	0.0593589
								d153	k__Bacteria, p__OP11, c__WCHB1-64, o__d153	0.00329772		Oscillospira	k__Bacteria, p__Firmicutes, c__Clostridia, o__Clostridiales, f__Ruminococcaceae, g__Oscillospira	0.0527635
								RB046	k__Bacteria, p__Armatimonadetes, c__SJA-176, o__RB046	0.00329772		{Unknown Genus} Clostridiaceae	k__Bacteria, p__Firmicutes, c__Clostridia, o__Clostridiales, f__Clostridiaceae, g__	0.0494658
								Natranaerobiales	k__Bacteria, p__Firmicutes, c__Clostridia, o__Natranaerobiales	0.00329772		{Unknown Genus} Rhodobacteraceae	k__Bacteria, p__Proteobacteria, c__Alphaproteobacteria, o__Rhodobacterales, f__Rhodobacteraceae, g__	0.034626
								Desulfuromonadales	k__Bacteria, p__Proteobacteria, c__Deltaproteobacteria, o__Desulfuromonadales	0.00329772		{Unknown Genus} Peptococcaceae	k__Bacteria, p__Firmicutes, c__Clostridia, o__Clostridiales, f__Peptococcaceae, g__	0.034626
								Thiohalorhabdales	k__Bacteria, p__Proteobacteria, c__Gammaproteobacteria, o__Thiohalorhabdales	0.00329772		Delftia	k__Bacteria, p__Proteobacteria, c__Betaproteobacteria, o__Burkholderiales, f__Comamonadaceae, g__Delftia	0.0280306
								WCHB1-15	k__Bacteria, p__WS6, c__SC72, o__WCHB1-15	0.00329772		Psychrobacter	k__Bacteria, p__Proteobacteria, c__Gammaproteobacteria, o__Pseudomonadales, f__Moraxellaceae, g__Psychrobacter	0.0280306
								Rhodospirillales	k__Bacteria, p__Proteobacteria, c__Alphaproteobacteria, o__Rhodospirillales	0.00164886		{Unknown Family} Bacteroidales	k__Bacteria, p__Bacteroidetes, c__Bacteroidia, o__Bacteroidales, f__, g__	0.0263817
								Solirubrobacterales	k__Bacteria, p__Actinobacteria, c__Thermoleophilia, o__Solirubrobacterales	0.00164886		{Unknown Genus} Helicobacteraceae	k__Bacteria, p__Proteobacteria, c__Epsilonproteobacteria, o__Campylobacterales, f__Helicobacteraceae, g__	0.0247329
												{Unknown Genus} Bradyrhizobiaceae	k__Bacteria, p__Proteobacteria, c__Alphaproteobacteria, o__Rhizobiales, f__Bradyrhizobiaceae, g__	0.023084
												Acidaminobacter	k__Bacteria, p__Firmicutes, c__Clostridia, o__Clostridiales, f__[Acidaminobacteraceae], g__Acidaminobacter	0.023084
												Arthrobacter	k__Bacteria, p__Actinobacteria, c__Actinobacteria, o__Actinomycetales, f__Micrococcaceae, g__Arthrobacter	0.0214352
												{Unknown Family} Burkholderiales	k__Bacteria, p__Proteobacteria, c__Betaproteobacteria, o__Burkholderiales, f__, g__	0.0197863
												Leucobacter	k__Bacteria, p__Actinobacteria, c__Actinobacteria, o__Actinomycetales, f__Microbacteriaceae, g__Leucobacter	0.0197863
												{Unknown Genus} Coriobacteriaceae	k__Bacteria, p__Actinobacteria, c__Coriobacteriia, o__Coriobacteriales, f__Coriobacteriaceae, g__	0.0197863
												{Unknown Genus} Porphyromonadaceae	k__Bacteria, p__Bacteroidetes, c__Bacteroidia, o__Bacteroidales, f__Porphyromonadaceae, g__	0.0197863
												Sulfurospirillum	k__Bacteria, p__Proteobacteria, c__Epsilonproteobacteria, o__Campylobacterales, f__Campylobacteraceae, g__Sulfurospirillum	0.0197863
												Halochromatium	k__Bacteria, p__Proteobacteria, c__Gammaproteobacteria, o__Chromatiales, f__Chromatiaceae, g__Halochromatium	0.0197863
												Flavobacterium	k__Bacteria, p__Bacteroidetes, c__Flavobacteriia, o__Flavobacteriales, f__Flavobacteriaceae, g__Flavobacterium	0.0164886
												Brevundimonas	k__Bacteria, p__Proteobacteria, c__Alphaproteobacteria, o__Caulobacterales, f__Caulobacteraceae, g__Brevundimonas	0.0148397
												{Unknown Family} Rhizobiales	k__Bacteria, p__Proteobacteria, c__Alphaproteobacteria, o__Rhizobiales, f__, g__	0.0131909
												{Unknown Genus} Ruminococcaceae	k__Bacteria, p__Firmicutes, c__Clostridia, o__Clostridiales, f__Ruminococcaceae, g__	0.0131909
												Chrysiogenes	k__Bacteria, p__Chrysiogenetes, c__Chrysiogenetes, o__Chrysiogenales, f__Chrysiogenaceae, g__Chrysiogenes	0.0131909
												Acetobacterium	k__Bacteria, p__Firmicutes, c__Clostridia, o__Clostridiales, f__Eubacteriaceae, g__Acetobacterium	0.0131909
												Coprococcus	k__Bacteria, p__Firmicutes, c__Clostridia, o__Clostridiales, f__Lachnospiraceae, g__Coprococcus	0.0131909
												{Unknown Order} Gammaproteobacteria	k__Bacteria, p__Proteobacteria, c__Gammaproteobacteria, o__, f__, g__	0.011542
												Microbacterium	k__Bacteria, p__Actinobacteria, c__Actinobacteria, o__Actinomycetales, f__Microbacteriaceae, g__Microbacterium	0.011542
												{Unknown Genus} Veillonellaceae	k__Bacteria, p__Firmicutes, c__Clostridia, o__Clostridiales, f__Veillonellaceae, g__	0.011542
												{Unknown Genus} Rhodocyclaceae	k__Bacteria, p__Proteobacteria, c__Betaproteobacteria, o__Rhodocyclales, f__Rhodocyclaceae, g__	0.00989315
												Rhodobacter	k__Bacteria, p__Proteobacteria, c__Alphaproteobacteria, o__Rhodobacterales, f__Rhodobacteraceae, g__Rhodobacter	0.00989315
												Desulfomicrobium	k__Bacteria, p__Proteobacteria, c__Deltaproteobacteria, o__Desulfovibrionales, f__Desulfomicrobiaceae, g__Desulfomicrobium	0.00989315
												{Unknown Genus} Ectothiorhodospiraceae	k__Bacteria, p__Proteobacteria, c__Gammaproteobacteria, o__Chromatiales, f__Ectothiorhodospiraceae, g__	0.00989315
												Marinobacterium	k__Bacteria, p__Proteobacteria, c__Gammaproteobacteria, o__Oceanospirillales, f__Oceanospirillaceae, g__Marinobacterium	0.00989315
												{Unknown Family} Actinomycetales	k__Bacteria, p__Actinobacteria, c__Actinobacteria, o__Actinomycetales, f__, g__	0.00824429
												{Unknown Genus} Rhizobiaceae	k__Bacteria, p__Proteobacteria, c__Alphaproteobacteria, o__Rhizobiales, f__Rhizobiaceae, g__	0.00824429
												{Unknown Genus} Oxalobacteraceae	k__Bacteria, p__Proteobacteria, c__Betaproteobacteria, o__Burkholderiales, f__Oxalobacteraceae, g__	0.00824429
												Sphingopyxis	k__Bacteria, p__Proteobacteria, c__Alphaproteobacteria, o__Sphingomonadales, f__Sphingomonadaceae, g__Sphingopyxis	0.00659544
												Luteolibacter	k__Bacteria, p__Verrucomicrobia, c__Verrucomicrobiae, o__Verrucomicrobiales, f__Verrucomicrobiaceae, g__Luteolibacter	0.00659544
												{Unknown Genus} Rarobacteraceae	k__Bacteria, p__Actinobacteria, c__Actinobacteria, o__Actinomycetales, f__Rarobacteraceae, g__	0.00659544
												{Unknown Order} OPB41	k__Bacteria, p__Actinobacteria, c__OPB41, o__, f__, g__	0.00659544
												{Unknown Genus} SB-1	k__Bacteria, p__Bacteroidetes, c__Bacteroidia, o__Bacteroidales, f__SB-1, g__	0.00659544
												{Unknown Genus} [Tissierellaceae]	k__Bacteria, p__Firmicutes, c__Clostridia, o__Clostridiales, f__[Tissierellaceae], g__	0.00659544
												{Unknown Genus} Christensenellaceae	k__Bacteria, p__Firmicutes, c__Clostridia, o__Clostridiales, f__Christensenellaceae, g__	0.00659544
												Pelosinus	k__Bacteria, p__Firmicutes, c__Clostridia, o__Clostridiales, f__Veillonellaceae, g__Pelosinus	0.00659544
												Spongiibacter	k__Bacteria, p__Proteobacteria, c__Gammaproteobacteria, o__Alteromonadales, f__Alteromonadaceae, g__Spongiibacter	0.00659544
												Isochromatium	k__Bacteria, p__Proteobacteria, c__Gammaproteobacteria, o__Chromatiales, f__Chromatiaceae, g__Isochromatium	0.00659544
												Gordonia	k__Bacteria, p__Actinobacteria, c__Actinobacteria, o__Actinomycetales, f__Gordoniaceae, g__Gordonia	0.00494658
												{Unknown Genus} Micrococcaceae	k__Bacteria, p__Actinobacteria, c__Actinobacteria, o__Actinomycetales, f__Micrococcaceae, g__	0.00329772
												Balneimonas	k__Bacteria, p__Proteobacteria, c__Alphaproteobacteria, o__Rhizobiales, f__Bradyrhizobiaceae, g__Balneimonas	0.00329772
												Phenylobacterium	k__Bacteria, p__Proteobacteria, c__Alphaproteobacteria, o__Caulobacterales, f__Caulobacteraceae, g__Phenylobacterium	0.00329772
												{Unknown Genus} Caulobacteraceae	k__Bacteria, p__Proteobacteria, c__Alphaproteobacteria, o__Caulobacterales, f__Caulobacteraceae, g__	0.00329772
												Bacillus	k__Bacteria, p__Firmicutes, c__Bacilli, o__Bacillales, f__Bacillaceae, g__Bacillus	0.00329772
												Agrobacterium	k__Bacteria, p__Proteobacteria, c__Alphaproteobacteria, o__Rhizobiales, f__Rhizobiaceae, g__Agrobacterium	0.00329772
												{Unknown Order} TM7-3	k__Bacteria, p__TM7, c__TM7-3, o__, f__, g__	0.00329772
												{Unknown Family} Rickettsiales	k__Bacteria, p__Proteobacteria, c__Alphaproteobacteria, o__Rickettsiales, f__, g__	0.00329772
												{Unknown Family} d153	k__Bacteria, p__OP11, c__WCHB1-64, o__d153, f__, g__	0.00329772
												Uliginosibacterium	k__Bacteria, p__Proteobacteria, c__Betaproteobacteria, o__Rhodocyclales, f__Rhodocyclaceae, g__Uliginosibacterium	0.00329772
												Sphingobium	k__Bacteria, p__Proteobacteria, c__Alphaproteobacteria, o__Sphingomonadales, f__Sphingomonadaceae, g__Sphingobium	0.00329772
												{Unknown Family} RB046	k__Bacteria, p__Armatimonadetes, c__SJA-176, o__RB046, f__, g__	0.00329772
												{Unknown Genus} BA008	k__Bacteria, p__Bacteroidetes, c__Bacteroidia, o__Bacteroidales, f__BA008, g__	0.00329772
												Bacteroides	k__Bacteria, p__Bacteroidetes, c__Bacteroidia, o__Bacteroidales, f__Bacteroidaceae, g__Bacteroides	0.00329772
												Paludibacter	k__Bacteria, p__Bacteroidetes, c__Bacteroidia, o__Bacteroidales, f__Porphyromonadaceae, g__Paludibacter	0.00329772
												Vagococcus	k__Bacteria, p__Firmicutes, c__Bacilli, o__Lactobacillales, f__Enterococcaceae, g__Vagococcus	0.00329772
												Tindallia_Anoxynatronum	k__Bacteria, p__Firmicutes, c__Clostridia, o__Clostridiales, f__Clostridiaceae, g__Tindallia_Anoxynatronum	0.00329772
												{Unknown Genus} SBYG_4172	k__Bacteria, p__Firmicutes, c__Clostridia, o__Clostridiales, f__SBYG_4172, g__	0.00329772
												{Unknown Genus} Anaerobrancaceae	k__Bacteria, p__Firmicutes, c__Clostridia, o__Natranaerobiales, f__Anaerobrancaceae, g__	0.00329772
												Aurantimonas	k__Bacteria, p__Proteobacteria, c__Alphaproteobacteria, o__Rhizobiales, f__Aurantimonadaceae, g__Aurantimonas	0.00329772
												Bradyrhizobium	k__Bacteria, p__Proteobacteria, c__Alphaproteobacteria, o__Rhizobiales, f__Bradyrhizobiaceae, g__Bradyrhizobium	0.00329772
												Hydrogenophaga	k__Bacteria, p__Proteobacteria, c__Betaproteobacteria, o__Burkholderiales, f__Comamonadaceae, g__Hydrogenophaga	0.00329772
												Desulfovibrio	k__Bacteria, p__Proteobacteria, c__Deltaproteobacteria, o__Desulfovibrionales, f__Desulfovibrionaceae, g__Desulfovibrio	0.00329772
												Desulfuromonas	k__Bacteria, p__Proteobacteria, c__Deltaproteobacteria, o__Desulfuromonadales, f__Pelobacteraceae, g__Desulfuromonas	0.00329772
												{Unknown Genus} Idiomarinaceae	k__Bacteria, p__Proteobacteria, c__Gammaproteobacteria, o__Alteromonadales, f__Idiomarinaceae, g__	0.00329772
												Candidatus Portiera	k__Bacteria, p__Proteobacteria, c__Gammaproteobacteria, o__Oceanospirillales, f__Halomonadaceae, g__Candidatus Portiera	0.00329772
												{Unknown Family} Thiohalorhabdales	k__Bacteria, p__Proteobacteria, c__Gammaproteobacteria, o__Thiohalorhabdales, f__, g__	0.00329772
												HA73	k__Bacteria, p__Synergistetes, c__Synergistia, o__Synergistales, f__Dethiosulfovibrionaceae, g__HA73	0.00329772
												{Unknown Genus} Thermovirgaceae	k__Bacteria, p__Synergistetes, c__Synergistia, o__Synergistales, f__Thermovirgaceae, g__	0.00329772
												{Unknown Family} WCHB1-15	k__Bacteria, p__WS6, c__SC72, o__WCHB1-15, f__, g__	0.00329772
												Rhodococcus	k__Bacteria, p__Actinobacteria, c__Actinobacteria, o__Actinomycetales, f__Nocardiaceae, g__Rhodococcus	0.00164886
												Patulibacter	k__Bacteria, p__Actinobacteria, c__Thermoleophilia, o__Solirubrobacterales, f__Patulibacteraceae, g__Patulibacter	0.00164886
												{Unknown Genus} Acetobacteraceae	k__Bacteria, p__Proteobacteria, c__Alphaproteobacteria, o__Rhodospirillales, f__Acetobacteraceae, g__	0.00164886
												{Unknown Genus} Methylobacteriaceae	k__Bacteria, p__Proteobacteria, c__Alphaproteobacteria, o__Rhizobiales, f__Methylobacteriaceae, g__	0.00164886

## Sheet: 16S Soil
Soil: Phylum				Soil: Class				Soil: Order				Soil: Genus
Phylum (Aggregated)	Taxonomy	Abundance [%]		Class (Aggregated)	Taxonomy	Abundance [%]		Order (Aggregated)	Taxonomy	Abundance [%]		Genus (Aggregated)	Taxonomy	Abundance [%]
Proteobacteria	k__Bacteria, p__Proteobacteria	37.7403		Gammaproteobacteria	k__Bacteria, p__Proteobacteria, c__Gammaproteobacteria	17.3893		Cytophagales	k__Bacteria, p__Bacteroidetes, c__Cytophagia, o__Cytophagales	10.4881		{Unknown Genus} Cytophagaceae	k__Bacteria, p__Bacteroidetes, c__Cytophagia, o__Cytophagales, f__Cytophagaceae, g__	10.0229
Bacteroidetes	k__Bacteria, p__Bacteroidetes	21.3468		Alphaproteobacteria	k__Bacteria, p__Proteobacteria, c__Alphaproteobacteria	11.6728		Pseudomonadales	k__Bacteria, p__Proteobacteria, c__Gammaproteobacteria, o__Pseudomonadales	9.50322		Pseudomonas	k__Bacteria, p__Proteobacteria, c__Gammaproteobacteria, o__Pseudomonadales, f__Pseudomonadaceae, g__Pseudomonas	9.31424
Actinobacteria	k__Bacteria, p__Actinobacteria	13.5516		Acidobacteria-6	k__Bacteria, p__Acidobacteria, c__Acidobacteria-6	10.8115		iii1-15	k__Bacteria, p__Acidobacteria, c__Acidobacteria-6, o__iii1-15	9.15798		{Unknown Family} iii1-15	k__Bacteria, p__Acidobacteria, c__Acidobacteria-6, o__iii1-15, f__, g__	7.11197
Acidobacteria	k__Bacteria, p__Acidobacteria	12.4141		Cytophagia	k__Bacteria, p__Bacteroidetes, c__Cytophagia	10.4881		Acidimicrobiales	k__Bacteria, p__Actinobacteria, c__Acidimicrobiia, o__Acidimicrobiales	6.91936		{Unknown Genus} Saprospiraceae	k__Bacteria, p__Bacteroidetes, c__[Saprospirae], o__[Saprospirales], f__Saprospiraceae, g__	4.42999
Planctomycetes	k__Bacteria, p__Planctomycetes	4.34277		Acidimicrobiia	k__Bacteria, p__Actinobacteria, c__Acidimicrobiia	6.91936		[Saprospirales]	k__Bacteria, p__Bacteroidetes, c__[Saprospirae], o__[Saprospirales]	6.18527		{Unknown Genus} C111	k__Bacteria, p__Actinobacteria, c__Acidimicrobiia, o__Acidimicrobiales, f__C111, g__	3.37246
Verrucomicrobia	k__Bacteria, p__Verrucomicrobia	2.87095		[Saprospirae]	k__Bacteria, p__Bacteroidetes, c__[Saprospirae]	6.18527		Xanthomonadales	k__Bacteria, p__Proteobacteria, c__Gammaproteobacteria, o__Xanthomonadales	4.8043		{Unknown Family} Acidimicrobiales	k__Bacteria, p__Actinobacteria, c__Acidimicrobiia, o__Acidimicrobiales, f__, g__	3.0999
Chloroflexi	k__Bacteria, p__Chloroflexi	2.69651		Actinobacteria	k__Bacteria, p__Actinobacteria, c__Actinobacteria	4.6226		Actinomycetales	k__Bacteria, p__Actinobacteria, c__Actinobacteria, o__Actinomycetales	4.57172		{Unknown Family} Myxococcales	k__Bacteria, p__Proteobacteria, c__Deltaproteobacteria, o__Myxococcales, f__, g__	2.68925
Gemmatimonadetes	k__Bacteria, p__Gemmatimonadetes	1.71894		Deltaproteobacteria	k__Bacteria, p__Proteobacteria, c__Deltaproteobacteria	4.37911		Rhizobiales	k__Bacteria, p__Proteobacteria, c__Alphaproteobacteria, o__Rhizobiales	4.4845		{Unknown Genus} Xanthomonadaceae	k__Bacteria, p__Proteobacteria, c__Gammaproteobacteria, o__Xanthomonadales, f__Xanthomonadaceae, g__	2.67108
TM7	k__Bacteria, p__TM7	0.868554		Betaproteobacteria	k__Bacteria, p__Proteobacteria, c__Betaproteobacteria	4.24828		Myxococcales	k__Bacteria, p__Proteobacteria, c__Deltaproteobacteria, o__Myxococcales	3.86307		Flavobacterium	k__Bacteria, p__Bacteroidetes, c__Flavobacteriia, o__Flavobacteriales, f__Flavobacteriaceae, g__Flavobacterium	2.3004
WS3	k__Bacteria, p__WS3	0.788603		Flavobacteriia	k__Bacteria, p__Bacteroidetes, c__Flavobacteriia	3.57234		Flavobacteriales	k__Bacteria, p__Bacteroidetes, c__Flavobacteriia, o__Flavobacteriales	3.57234		{Unknown Family} CL500-15	k__Bacteria, p__Planctomycetes, c__OM190, o__CL500-15, f__, g__	2.23498
Nitrospirae	k__Bacteria, p__Nitrospirae	0.381582		OM190	k__Bacteria, p__Planctomycetes, c__OM190	2.41305		Sphingomonadales	k__Bacteria, p__Proteobacteria, c__Alphaproteobacteria, o__Sphingomonadales	2.6311		{Unknown Genus} [Marinicellaceae]	k__Bacteria, p__Proteobacteria, c__Gammaproteobacteria, o__[Marinicellales], f__[Marinicellaceae], g__	2.14776
Firmicutes	k__Bacteria, p__Firmicutes	0.37068		Thermoleophilia	k__Bacteria, p__Actinobacteria, c__Thermoleophilia	1.7044		Rhodospirillales	k__Bacteria, p__Proteobacteria, c__Alphaproteobacteria, o__Rhodospirillales	2.3113		{Unknown Genus} Sinobacteraceae	k__Bacteria, p__Proteobacteria, c__Gammaproteobacteria, o__Xanthomonadales, f__Sinobacteraceae, g__	1.90791
Elusimicrobia	k__Bacteria, p__Elusimicrobia	0.207145		Verrucomicrobiae	k__Bacteria, p__Verrucomicrobia, c__Verrucomicrobiae	1.20653		CL500-15	k__Bacteria, p__Planctomycetes, c__OM190, o__CL500-15	2.23498		{Unknown Genus} Rhodospirillaceae	k__Bacteria, p__Proteobacteria, c__Alphaproteobacteria, o__Rhodospirillales, f__Rhodospirillaceae, g__	1.8643
GN02	k__Bacteria, p__GN02	0.116292		Planctomycetia	k__Bacteria, p__Planctomycetes, c__Planctomycetia	1.19199		[Marinicellales]	k__Bacteria, p__Proteobacteria, c__Gammaproteobacteria, o__[Marinicellales]	2.14776		{Unknown Genus} Chitinophagaceae	k__Bacteria, p__Bacteroidetes, c__[Saprospirae], o__[Saprospirales], f__Chitinophagaceae, g__	1.56994
Cyanobacteria	k__Bacteria, p__Cyanobacteria	0.105389		Sphingobacteriia	k__Bacteria, p__Bacteroidetes, c__Sphingobacteriia	1.09387		Burkholderiales	k__Bacteria, p__Proteobacteria, c__Betaproteobacteria, o__Burkholderiales	1.51179		{Unknown Genus} RB40	k__Bacteria, p__Acidobacteria, c__Acidobacteria-6, o__iii1-15, f__RB40, g__	1.36279
OD1	k__Bacteria, p__OD1	0.105389		Ellin6529	k__Bacteria, p__Chloroflexi, c__Ellin6529	0.966675		Verrucomicrobiales	k__Bacteria, p__Verrucomicrobia, c__Verrucomicrobiae, o__Verrucomicrobiales	1.20653		Kaistobacter	k__Bacteria, p__Proteobacteria, c__Alphaproteobacteria, o__Sphingomonadales, f__Sphingomonadaceae, g__Kaistobacter	1.22833
Chlamydiae	k__Bacteria, p__Chlamydiae	0.0726823		Gemm-1	k__Bacteria, p__Gemmatimonadetes, c__Gemm-1	0.792238		Sphingobacteriales	k__Bacteria, p__Bacteroidetes, c__Sphingobacteriia, o__Sphingobacteriales	1.09387		{Unknown Genus} Nocardioidaceae	k__Bacteria, p__Actinobacteria, c__Actinobacteria, o__Actinomycetales, f__Nocardioidaceae, g__	1.06843
Fibrobacteres	k__Bacteria, p__Fibrobacteres	0.0472435		PRR-12	k__Bacteria, p__WS3, c__PRR-12	0.788603		Rhodobacterales	k__Bacteria, p__Proteobacteria, c__Alphaproteobacteria, o__Rhodobacterales	1.05753		{Unknown Genus} Verrucomicrobiaceae	k__Bacteria, p__Verrucomicrobia, c__Verrucomicrobiae, o__Verrucomicrobiales, f__Verrucomicrobiaceae, g__	1.05389
WS6	k__Bacteria, p__WS6	0.0436094		Gemmatimonadetes	k__Bacteria, p__Gemmatimonadetes, c__Gemmatimonadetes	0.770433		{Unknown Order} Acidobacteria-6	k__Bacteria, p__Acidobacteria, c__Acidobacteria-6, o__	0.973943		{Unknown Genus} Comamonadaceae	k__Bacteria, p__Proteobacteria, c__Betaproteobacteria, o__Burkholderiales, f__Comamonadaceae, g__	1.00665
Chlorobi	k__Bacteria, p__Chlorobi	0.0399753		[Spartobacteria]	k__Bacteria, p__Verrucomicrobia, c__[Spartobacteria]	0.730458		Gaiellales	k__Bacteria, p__Actinobacteria, c__Thermoleophilia, o__Gaiellales	0.966675		Rhodoplanes	k__Bacteria, p__Proteobacteria, c__Alphaproteobacteria, o__Rhizobiales, f__Hyphomicrobiaceae, g__Rhodoplanes	0.984846
Armatimonadetes	k__Bacteria, p__Armatimonadetes	0.0363412		[Chloracidobacteria]	k__Bacteria, p__Acidobacteria, c__[Chloracidobacteria]	0.675946		{Unknown Order} Ellin6529	k__Bacteria, p__Chloroflexi, c__Ellin6529, o__	0.966675		{Unknown Order} Acidobacteria-6	k__Bacteria, p__Acidobacteria, c__Acidobacteria-6, o__, f__, g__	0.973943
OP11	k__Bacteria, p__OP11	0.0254388		[Pedosphaerae]	k__Bacteria, p__Verrucomicrobia, c__[Pedosphaerae]	0.614166		SC-I-84	k__Bacteria, p__Proteobacteria, c__Betaproteobacteria, o__SC-I-84	0.923066		{Unknown Order} Ellin6529	k__Bacteria, p__Chloroflexi, c__Ellin6529, o__, f__, g__	0.966675
TM6	k__Bacteria, p__TM6	0.0218047		TM7-1	k__Bacteria, p__TM7, c__TM7-1	0.592361		Ellin6067	k__Bacteria, p__Proteobacteria, c__Betaproteobacteria, o__Ellin6067	0.897627		{Unknown Genus} Gaiellaceae	k__Bacteria, p__Actinobacteria, c__Thermoleophilia, o__Gaiellales, f__Gaiellaceae, g__	0.937602
N/A	N/A	0.0218047		Phycisphaerae	k__Bacteria, p__Planctomycetes, c__Phycisphaerae	0.465167		Pirellulales	k__Bacteria, p__Planctomycetes, c__Planctomycetia, o__Pirellulales	0.795872		{Unknown Genus} Rhodobacteraceae	k__Bacteria, p__Proteobacteria, c__Alphaproteobacteria, o__Rhodobacterales, f__Rhodobacteraceae, g__	0.937602
BHI80-139	k__Bacteria, p__BHI80-139	0.0145365		TK17	k__Bacteria, p__Chloroflexi, c__TK17	0.457899		{Unknown Order} Gemm-1	k__Bacteria, p__Gemmatimonadetes, c__Gemm-1, o__	0.792238		{Unknown Family} SC-I-84	k__Bacteria, p__Proteobacteria, c__Betaproteobacteria, o__SC-I-84, f__, g__	0.923066
BRC1	k__Bacteria, p__BRC1	0.0145365		Nitrospira	k__Bacteria, p__Nitrospirae, c__Nitrospira	0.381582		Sediment-1	k__Bacteria, p__WS3, c__PRR-12, o__Sediment-1	0.766799		{Unknown Family} Rhizobiales	k__Bacteria, p__Proteobacteria, c__Alphaproteobacteria, o__Rhizobiales, f__, g__	0.912163
Euryarchaeota	k__Archaea, p__Euryarchaeota	0.00726823		Acidobacteria-5	k__Bacteria, p__Acidobacteria, c__Acidobacteria-5	0.363412		Solirubrobacterales	k__Bacteria, p__Actinobacteria, c__Thermoleophilia, o__Solirubrobacterales	0.737726		{Unknown Family} Ellin6067	k__Bacteria, p__Proteobacteria, c__Betaproteobacteria, o__Ellin6067, f__, g__	0.897627
FCPU426	k__Bacteria, p__FCPU426	0.00726823		Sva0725	k__Bacteria, p__Acidobacteria, c__Sva0725	0.352509		[Chthoniobacterales]	k__Bacteria, p__Verrucomicrobia, c__[Spartobacteria], o__[Chthoniobacterales]	0.730458		{Unknown Genus} Sphingomonadaceae	k__Bacteria, p__Proteobacteria, c__Alphaproteobacteria, o__Sphingomonadales, f__Sphingomonadaceae, g__	0.843115
Kazan-3B-28	k__Bacteria, p__Kazan-3B-28	0.00726823		Bacilli	k__Bacteria, p__Firmicutes, c__Bacilli	0.345241		CCU21	k__Bacteria, p__Acidobacteria, c__Acidobacteria-6, o__CCU21	0.67958		{Unknown Family} Sphingobacteriales	k__Bacteria, p__Bacteroidetes, c__Sphingobacteriia, o__Sphingobacteriales, f__, g__	0.82131
Lentisphaerae	k__Bacteria, p__Lentisphaerae	0.00726823		Thermomicrobia	k__Bacteria, p__Chloroflexi, c__Thermomicrobia	0.337973		RB41	k__Bacteria, p__Acidobacteria, c__[Chloracidobacteria], o__RB41	0.646873		{Unknown Order} Gemm-1	k__Bacteria, p__Gemmatimonadetes, c__Gemm-1, o__, f__, g__	0.792238
Tenericutes	k__Bacteria, p__Tenericutes	0.00726823		Anaerolineae	k__Bacteria, p__Chloroflexi, c__Anaerolineae	0.319802		[Pedosphaerales]	k__Bacteria, p__Verrucomicrobia, c__[Pedosphaerae], o__[Pedosphaerales]	0.614166		{Unknown Genus} Hyphomicrobiaceae	k__Bacteria, p__Proteobacteria, c__Alphaproteobacteria, o__Rhizobiales, f__Hyphomicrobiaceae, g__	0.792238
Chrysiogenetes	k__Bacteria, p__Chrysiogenetes	0		MB-A2-108	k__Bacteria, p__Actinobacteria, c__MB-A2-108	0.290729		{Unknown Order} TM7-1	k__Bacteria, p__TM7, c__TM7-1, o__	0.592361		{Unknown Genus} [Weeksellaceae]	k__Bacteria, p__Bacteroidetes, c__Flavobacteriia, o__Flavobacteriales, f__[Weeksellaceae], g__	0.744994
Synergistetes	k__Bacteria, p__Synergistetes	0		{Unknown Class} TM7	k__Bacteria, p__TM7, c__	0.236218		{Unknown Order} Alphaproteobacteria	k__Bacteria, p__Proteobacteria, c__Alphaproteobacteria, o__	0.501508		{Unknown Family} Sediment-1	k__Bacteria, p__WS3, c__PRR-12, o__Sediment-1, f__, g__	0.730458
				Elusimicrobia	k__Bacteria, p__Elusimicrobia, c__Elusimicrobia	0.207145		Caulobacterales	k__Bacteria, p__Proteobacteria, c__Alphaproteobacteria, o__Caulobacterales	0.439728		{Unknown Genus} OM27	k__Bacteria, p__Proteobacteria, c__Deltaproteobacteria, o__Myxococcales, f__OM27, g__	0.705019
				Opitutae	k__Bacteria, p__Verrucomicrobia, c__Opitutae	0.192608		Thiotrichales	k__Bacteria, p__Proteobacteria, c__Gammaproteobacteria, o__Thiotrichales	0.388851		{Unknown Genus} mb2424	k__Bacteria, p__Acidobacteria, c__Acidobacteria-6, o__iii1-15, f__mb2424, g__	0.683214
				Gitt-GS-136	k__Bacteria, p__Chloroflexi, c__Gitt-GS-136	0.18534		Nitrospirales	k__Bacteria, p__Nitrospirae, c__Nitrospira, o__Nitrospirales	0.381582		{Unknown Family} CCU21	k__Bacteria, p__Acidobacteria, c__Acidobacteria-6, o__CCU21, f__, g__	0.67958
				Chloroflexi	k__Bacteria, p__Chloroflexi, c__Chloroflexi	0.163535		mle1-48	k__Bacteria, p__Chloroflexi, c__TK17, o__mle1-48	0.37068		Agromyces	k__Bacteria, p__Actinobacteria, c__Actinobacteria, o__Actinomycetales, f__Microbacteriaceae, g__Agromyces	0.639605
				TK10	k__Bacteria, p__Chloroflexi, c__TK10	0.159901		WD2101	k__Bacteria, p__Planctomycetes, c__Phycisphaerae, o__WD2101	0.37068		{Unknown Family} Solirubrobacterales	k__Bacteria, p__Actinobacteria, c__Thermoleophilia, o__Solirubrobacterales, f__, g__	0.599629
				vadinHA49	k__Bacteria, p__Planctomycetes, c__vadinHA49	0.141731		{Unknown Order} Acidobacteria-5	k__Bacteria, p__Acidobacteria, c__Acidobacteria-5, o__	0.363412		{Unknown Order} TM7-1	k__Bacteria, p__TM7, c__TM7-1, o__, f__, g__	0.592361
				{Unknown Class} Verrucomicrobia	k__Bacteria, p__Verrucomicrobia, c__	0.119926		Sva0725	k__Bacteria, p__Acidobacteria, c__Sva0725, o__Sva0725	0.352509		{Unknown Family} Actinomycetales	k__Bacteria, p__Actinobacteria, c__Actinobacteria, o__Actinomycetales, f__, g__	0.563288
				S085	k__Bacteria, p__Chloroflexi, c__S085	0.0908529		Bacillales	k__Bacteria, p__Firmicutes, c__Bacilli, o__Bacillales	0.345241		Pirellula	k__Bacteria, p__Planctomycetes, c__Planctomycetia, o__Pirellulales, f__Pirellulaceae, g__Pirellula	0.545118
				Chloroplast	k__Bacteria, p__Cyanobacteria, c__Chloroplast	0.0908529		{Unknown Order} Betaproteobacteria	k__Bacteria, p__Proteobacteria, c__Betaproteobacteria, o__	0.341607		{Unknown Order} Alphaproteobacteria	k__Bacteria, p__Proteobacteria, c__Alphaproteobacteria, o__, f__, g__	0.501508
				Gemm-5	k__Bacteria, p__Gemmatimonadetes, c__Gemm-5	0.0908529		JG30-KF-CM45	k__Bacteria, p__Chloroflexi, c__Thermomicrobia, o__JG30-KF-CM45	0.327071		{Unknown Genus} Flavobacteriaceae	k__Bacteria, p__Bacteroidetes, c__Flavobacteriia, o__Flavobacteriales, f__Flavobacteriaceae, g__	0.483338
				3BR-5F	k__Bacteria, p__GN02, c__3BR-5F	0.0872188		Syntrophobacterales	k__Bacteria, p__Proteobacteria, c__Deltaproteobacteria, o__Syntrophobacterales	0.319802		{Unknown Family} [Pedosphaerales]	k__Bacteria, p__Verrucomicrobia, c__[Pedosphaerae], o__[Pedosphaerales], f__, g__	0.468801
				{Unknown Class} Planctomycetes	k__Bacteria, p__Planctomycetes, c__	0.0763165		0319-7L14	k__Bacteria, p__Actinobacteria, c__MB-A2-108, o__0319-7L14	0.290729		{Unknown Genus} Piscirickettsiaceae	k__Bacteria, p__Proteobacteria, c__Gammaproteobacteria, o__Thiotrichales, f__Piscirickettsiaceae, g__	0.388851
				Chlamydiia	k__Bacteria, p__Chlamydiae, c__Chlamydiia	0.0726823		IS-44	k__Bacteria, p__Proteobacteria, c__Betaproteobacteria, o__IS-44	0.279827		Kribbella	k__Bacteria, p__Actinobacteria, c__Actinobacteria, o__Actinomycetales, f__Nocardioidaceae, g__Kribbella	0.381582
				Solibacteres	k__Bacteria, p__Acidobacteria, c__Solibacteres	0.0690482		{Unknown Class} TM7	k__Bacteria, p__TM7, c__, o__	0.236218		{Unknown Family} mle1-48	k__Bacteria, p__Chloroflexi, c__TK17, o__mle1-48, f__, g__	0.37068
				{Unknown Class} Acidobacteria	k__Bacteria, p__Acidobacteria, c__	0.06178		N1423WL	k__Bacteria, p__Gemmatimonadetes, c__Gemmatimonadetes, o__N1423WL	0.221681		{Unknown Family} WD2101	k__Bacteria, p__Planctomycetes, c__Phycisphaerae, o__WD2101, f__, g__	0.37068
				{Unknown Class} OD1	k__Bacteria, p__OD1, c__	0.06178		Gemmatales	k__Bacteria, p__Planctomycetes, c__Planctomycetia, o__Gemmatales	0.192608		{Unknown Genus} Haliangiaceae	k__Bacteria, p__Proteobacteria, c__Deltaproteobacteria, o__Myxococcales, f__Haliangiaceae, g__	0.367046
				Fibrobacteria	k__Bacteria, p__Fibrobacteres, c__Fibrobacteria	0.0472435		{Unknown Order} Gitt-GS-136	k__Bacteria, p__Chloroflexi, c__Gitt-GS-136, o__	0.18534		{Unknown Order} Acidobacteria-5	k__Bacteria, p__Acidobacteria, c__Acidobacteria-5, o__, f__, g__	0.363412
				Gemm-2	k__Bacteria, p__Gemmatimonadetes, c__Gemm-2	0.0436094		{Unknown Order} Gemmatimonadetes	k__Bacteria, p__Gemmatimonadetes, c__Gemmatimonadetes, o__	0.181706		{Unknown Family} Sva0725	k__Bacteria, p__Acidobacteria, c__Sva0725, o__Sva0725, f__, g__	0.352509
				SJA-28	k__Bacteria, p__Chlorobi, c__SJA-28	0.0399753		Ellin5290	k__Bacteria, p__Gemmatimonadetes, c__Gemmatimonadetes, o__Ellin5290	0.178072		{Unknown Genus} Ellin6075	k__Bacteria, p__Acidobacteria, c__[Chloracidobacteria], o__RB41, f__Ellin6075, g__	0.341607
				Pla4	k__Bacteria, p__Planctomycetes, c__Pla4	0.0399753		agg27	k__Bacteria, p__Planctomycetes, c__OM190, o__agg27	0.178072		{Unknown Genus} Micrococcaceae	k__Bacteria, p__Actinobacteria, c__Actinobacteria, o__Actinomycetales, f__Micrococcaceae, g__	0.341607
				TM7-3	k__Bacteria, p__TM7, c__TM7-3	0.0399753		Legionellales	k__Bacteria, p__Proteobacteria, c__Gammaproteobacteria, o__Legionellales	0.174438		{Unknown Order} Betaproteobacteria	k__Bacteria, p__Proteobacteria, c__Betaproteobacteria, o__, f__, g__	0.341607
				RB25	k__Bacteria, p__Acidobacteria, c__RB25	0.0363412		IIb	k__Bacteria, p__Elusimicrobia, c__Elusimicrobia, o__IIb	0.167169		{Unknown Family} JG30-KF-CM45	k__Bacteria, p__Chloroflexi, c__Thermomicrobia, o__JG30-KF-CM45, f__, g__	0.327071
				ZB2	k__Bacteria, p__OD1, c__ZB2	0.0363412		Ellin329	k__Bacteria, p__Proteobacteria, c__Alphaproteobacteria, o__Ellin329	0.167169		Devosia	k__Bacteria, p__Proteobacteria, c__Alphaproteobacteria, o__Rhizobiales, f__Hyphomicrobiaceae, g__Devosia	0.327071
				GKS2-174	k__Bacteria, p__GN02, c__GKS2-174	0.0290729		Planctomycetales	k__Bacteria, p__Planctomycetes, c__Planctomycetia, o__Planctomycetales	0.163535		{Unknown Genus} Syntrophobacteraceae	k__Bacteria, p__Proteobacteria, c__Deltaproteobacteria, o__Syntrophobacterales, f__Syntrophobacteraceae, g__	0.319802
				{Unknown Class} Proteobacteria	k__Bacteria, p__Proteobacteria, c__	0.0290729		Opitutales	k__Bacteria, p__Verrucomicrobia, c__Opitutae, o__Opitutales	0.163535		{Unknown Family} Burkholderiales	k__Bacteria, p__Proteobacteria, c__Betaproteobacteria, o__Burkholderiales, f__, g__	0.3089
				Clostridia	k__Bacteria, p__Firmicutes, c__Clostridia	0.0254388		DH61	k__Bacteria, p__Planctomycetes, c__vadinHA49, o__DH61	0.141731		{Unknown Family} RB41	k__Bacteria, p__Acidobacteria, c__[Chloracidobacteria], o__RB41, f__, g__	0.305266
				WCHB1-64	k__Bacteria, p__OP11, c__WCHB1-64	0.0254388		Gemmatimonadales	k__Bacteria, p__Gemmatimonadetes, c__Gemmatimonadetes, o__Gemmatimonadales	0.12356		Candidatus Xiphinematobacter	k__Bacteria, p__Verrucomicrobia, c__[Spartobacteria], o__[Chthoniobacterales], f__[Chthoniobacteraceae], g__Candidatus Xiphinematobacter	0.294363
				Gemm-3	k__Bacteria, p__Gemmatimonadetes, c__Gemm-3	0.0218047		Bdellovibrionales	k__Bacteria, p__Proteobacteria, c__Deltaproteobacteria, o__Bdellovibrionales	0.119926		{Unknown Family} 0319-7L14	k__Bacteria, p__Actinobacteria, c__MB-A2-108, o__0319-7L14, f__, g__	0.290729
				TA18	k__Bacteria, p__Proteobacteria, c__TA18	0.0218047		{Unknown Class} Verrucomicrobia	k__Bacteria, p__Verrucomicrobia, c__, o__	0.119926		{Unknown Genus} Bradyrhizobiaceae	k__Bacteria, p__Proteobacteria, c__Alphaproteobacteria, o__Rhizobiales, f__Bradyrhizobiaceae, g__	0.290729
				SJA-4	k__Bacteria, p__TM6, c__SJA-4	0.0218047		A31	k__Bacteria, p__Chloroflexi, c__Anaerolineae, o__A31	0.116292		Afifella	k__Bacteria, p__Proteobacteria, c__Alphaproteobacteria, o__Rhizobiales, f__Rhodobiaceae, g__Afifella	0.283461
				B142	k__Bacteria, p__WS6, c__B142	0.0218047		AKYG885	k__Bacteria, p__Chloroflexi, c__TK10, o__AKYG885	0.116292		Balneimonas	k__Bacteria, p__Proteobacteria, c__Alphaproteobacteria, o__Rhizobiales, f__Bradyrhizobiaceae, g__Balneimonas	0.279827
				SC72	k__Bacteria, p__WS6, c__SC72	0.0218047		HTCC2188	k__Bacteria, p__Proteobacteria, c__Gammaproteobacteria, o__HTCC2188	0.105389		Sphingomonas	k__Bacteria, p__Proteobacteria, c__Alphaproteobacteria, o__Sphingomonadales, f__Sphingomonadaceae, g__Sphingomonas	0.279827
				N/A	N/A	0.0218047		Herpetosiphonales	k__Bacteria, p__Chloroflexi, c__Chloroflexi, o__Herpetosiphonales	0.0981212		{Unknown Family} IS-44	k__Bacteria, p__Proteobacteria, c__Betaproteobacteria, o__IS-44, f__, g__	0.279827
				BPC102	k__Bacteria, p__Acidobacteria, c__BPC102	0.0145365		{Unknown Order} S085	k__Bacteria, p__Chloroflexi, c__S085, o__	0.0908529		Phenylobacterium	k__Bacteria, p__Proteobacteria, c__Alphaproteobacteria, o__Caulobacterales, f__Caulobacteraceae, g__Phenylobacterium	0.261656
				iii1-8	k__Bacteria, p__Acidobacteria, c__iii1-8	0.0145365		{Unknown Order} Gemm-5	k__Bacteria, p__Gemmatimonadetes, c__Gemm-5, o__	0.0908529		{Unknown Genus} Nitrospiraceae	k__Bacteria, p__Nitrospirae, c__Nitrospira, o__Nitrospirales, f__Nitrospiraceae, g__	0.250754
				Rubrobacteria	k__Bacteria, p__Actinobacteria, c__Rubrobacteria	0.0145365		{Unknown Order} TK17	k__Bacteria, p__Chloroflexi, c__TK17, o__	0.0872188		{Unknown Genus} Pirellulaceae	k__Bacteria, p__Planctomycetes, c__Planctomycetia, o__Pirellulales, f__Pirellulaceae, g__	0.250754
				0319-6E2	k__Bacteria, p__Armatimonadetes, c__0319-6E2	0.0145365		{Unknown Order} 3BR-5F	k__Bacteria, p__GN02, c__3BR-5F, o__	0.0872188		Actinoplanes	k__Bacteria, p__Actinobacteria, c__Actinobacteria, o__Actinomycetales, f__Micromonosporaceae, g__Actinoplanes	0.236218
				{Unknown Class} BHI80-139	k__Bacteria, p__BHI80-139, c__	0.0145365		Phycisphaerales	k__Bacteria, p__Planctomycetes, c__Phycisphaerae, o__Phycisphaerales	0.0872188		{Unknown Class} TM7	k__Bacteria, p__TM7, c__, o__, f__, g__	0.236218
				PRR-11	k__Bacteria, p__BRC1, c__PRR-11	0.0145365		MND1	k__Bacteria, p__Proteobacteria, c__Betaproteobacteria, o__MND1	0.0872188		{Unknown Genus} Microbacteriaceae	k__Bacteria, p__Actinobacteria, c__Actinobacteria, o__Actinomycetales, f__Microbacteriaceae, g__	0.232583
				Methanomicrobia	k__Archaea, p__Euryarchaeota, c__Methanomicrobia	0.00726823		Alteromonadales	k__Bacteria, p__Proteobacteria, c__Gammaproteobacteria, o__Alteromonadales	0.0799506		{Unknown Family} Rhodospirillales	k__Bacteria, p__Proteobacteria, c__Alphaproteobacteria, o__Rhodospirillales, f__, g__	0.232583
				Acidobacteriia	k__Bacteria, p__Acidobacteria, c__Acidobacteriia	0.00726823		Caldilineales	k__Bacteria, p__Chloroflexi, c__Anaerolineae, o__Caldilineales	0.0763165		{Unknown Family} N1423WL	k__Bacteria, p__Gemmatimonadetes, c__Gemmatimonadetes, o__N1423WL, f__, g__	0.221681
				DA052	k__Bacteria, p__Acidobacteria, c__DA052	0.00726823		{Unknown Class} Planctomycetes	k__Bacteria, p__Planctomycetes, c__, o__	0.0763165		Sphingopyxis	k__Bacteria, p__Proteobacteria, c__Alphaproteobacteria, o__Sphingomonadales, f__Sphingomonadaceae, g__Sphingopyxis	0.207145
				[Fimbriimonadia]	k__Bacteria, p__Armatimonadetes, c__[Fimbriimonadia]	0.00726823		Rhodocyclales	k__Bacteria, p__Proteobacteria, c__Betaproteobacteria, o__Rhodocyclales	0.0726823		{Unknown Order} Gitt-GS-136	k__Bacteria, p__Chloroflexi, c__Gitt-GS-136, o__, f__, g__	0.18534
				Armatimonadia	k__Bacteria, p__Armatimonadetes, c__Armatimonadia	0.00726823		Solibacterales	k__Bacteria, p__Acidobacteria, c__Solibacteres, o__Solibacterales	0.0690482		{Unknown Genus} Pseudomonadaceae	k__Bacteria, p__Proteobacteria, c__Gammaproteobacteria, o__Pseudomonadales, f__Pseudomonadaceae, g__	0.18534
				SJA-176	k__Bacteria, p__Armatimonadetes, c__SJA-176	0.00726823		Aeromonadales	k__Bacteria, p__Proteobacteria, c__Gammaproteobacteria, o__Aeromonadales	0.0690482		{Unknown Order} Gemmatimonadetes	k__Bacteria, p__Gemmatimonadetes, c__Gemmatimonadetes, o__, f__, g__	0.181706
				At12OctB3	k__Bacteria, p__Bacteroidetes, c__At12OctB3	0.00726823		KD8-87	k__Bacteria, p__Gemmatimonadetes, c__Gemmatimonadetes, o__KD8-87	0.0654141		{Unknown Genus} AKIW874	k__Bacteria, p__Actinobacteria, c__Acidimicrobiia, o__Acidimicrobiales, f__AKIW874, g__	0.178072
				P2-11E	k__Bacteria, p__Chloroflexi, c__P2-11E	0.00726823		A21b	k__Bacteria, p__Proteobacteria, c__Betaproteobacteria, o__A21b	0.0654141		{Unknown Family} Ellin5290	k__Bacteria, p__Gemmatimonadetes, c__Gemmatimonadetes, o__Ellin5290, f__, g__	0.178072
				SHA-26	k__Bacteria, p__Chloroflexi, c__SHA-26	0.00726823		{Unknown Class} Acidobacteria	k__Bacteria, p__Acidobacteria, c__, o__	0.06178		{Unknown Family} agg27	k__Bacteria, p__Planctomycetes, c__OM190, o__agg27, f__, g__	0.178072
				4C0d-2	k__Bacteria, p__Cyanobacteria, c__4C0d-2	0.00726823		{Unknown Class} OD1	k__Bacteria, p__OD1, c__, o__	0.06178		{Unknown Family} Bacillales	k__Bacteria, p__Firmicutes, c__Bacilli, o__Bacillales, f__, g__	0.174438
				ML635J-21	k__Bacteria, p__Cyanobacteria, c__ML635J-21	0.00726823		H39	k__Bacteria, p__Chloroflexi, c__Anaerolineae, o__H39	0.0581459		Skermanella	k__Bacteria, p__Proteobacteria, c__Alphaproteobacteria, o__Rhodospirillales, f__Rhodospirillaceae, g__Skermanella	0.174438
				{Unknown Class} FCPU426	k__Bacteria, p__FCPU426, c__	0.00726823		Stramenopiles	k__Bacteria, p__Cyanobacteria, c__Chloroplast, o__Stramenopiles	0.0581459		{Unknown Genus} [Chthoniobacteraceae]	k__Bacteria, p__Verrucomicrobia, c__[Spartobacteria], o__[Chthoniobacterales], f__[Chthoniobacteraceae], g__	0.174438
				{Unknown Class} Kazan-3B-28	k__Bacteria, p__Kazan-3B-28, c__	0.00726823		SBR1031	k__Bacteria, p__Chloroflexi, c__Anaerolineae, o__SBR1031	0.0545118		Adhaeribacter	k__Bacteria, p__Bacteroidetes, c__Cytophagia, o__Cytophagales, f__Cytophagaceae, g__Adhaeribacter	0.167169
				[Lentisphaeria]	k__Bacteria, p__Lentisphaerae, c__[Lentisphaeria]	0.00726823		{Unknown Order} Actinobacteria	k__Bacteria, p__Actinobacteria, c__Actinobacteria, o__	0.0508776		Sporocytophaga	k__Bacteria, p__Bacteroidetes, c__Cytophagia, o__Cytophagales, f__Cytophagaceae, g__Sporocytophaga	0.167169
				SM2F11	k__Bacteria, p__OD1, c__SM2F11	0.00726823		Acidithiobacillales	k__Bacteria, p__Proteobacteria, c__Gammaproteobacteria, o__Acidithiobacillales	0.0508776		Pedobacter	k__Bacteria, p__Bacteroidetes, c__Sphingobacteriia, o__Sphingobacteriales, f__Sphingobacteriaceae, g__Pedobacter	0.167169
				BD7-11	k__Bacteria, p__Planctomycetes, c__BD7-11	0.00726823		258ds10	k__Bacteria, p__Fibrobacteres, c__Fibrobacteria, o__258ds10	0.0472435		{Unknown Family} IIb	k__Bacteria, p__Elusimicrobia, c__Elusimicrobia, o__IIb, f__, g__	0.167169
				Pla3	k__Bacteria, p__Planctomycetes, c__Pla3	0.00726823		AKIW781	k__Bacteria, p__Chloroflexi, c__Chloroflexi, o__AKIW781	0.0436094		{Unknown Family} Ellin329	k__Bacteria, p__Proteobacteria, c__Alphaproteobacteria, o__Ellin329, f__, g__	0.167169
				Mollicutes	k__Bacteria, p__Tenericutes, c__Mollicutes	0.00726823		{Unknown Order} Gemm-2	k__Bacteria, p__Gemmatimonadetes, c__Gemm-2, o__	0.0436094		Planctomyces	k__Bacteria, p__Planctomycetes, c__Planctomycetia, o__Planctomycetales, f__Planctomycetaceae, g__Planctomyces	0.163535
				[Methylacidiphilae]	k__Bacteria, p__Verrucomicrobia, c__[Methylacidiphilae]	0.00726823		{Unknown Order} SJA-28	k__Bacteria, p__Chlorobi, c__SJA-28, o__	0.0399753		Opitutus	k__Bacteria, p__Verrucomicrobia, c__Opitutae, o__Opitutales, f__Opitutaceae, g__Opitutus	0.163535
								{Unknown Order} Pla4	k__Bacteria, p__Planctomycetes, c__Pla4, o__	0.0399753		Dactylosporangium	k__Bacteria, p__Actinobacteria, c__Actinobacteria, o__Actinomycetales, f__Micromonosporaceae, g__Dactylosporangium	0.159901
								B97	k__Bacteria, p__Planctomycetes, c__Planctomycetia, o__B97	0.0399753		Luteolibacter	k__Bacteria, p__Verrucomicrobia, c__Verrucomicrobiae, o__Verrucomicrobiales, f__Verrucomicrobiaceae, g__Luteolibacter	0.145365
								{Unknown Order} RB25	k__Bacteria, p__Acidobacteria, c__RB25, o__	0.0363412		{Unknown Genus} EB1017	k__Bacteria, p__Actinobacteria, c__Acidimicrobiia, o__Acidimicrobiales, f__EB1017, g__	0.141731
								{Unknown Order} Chlamydiia	k__Bacteria, p__Chlamydiae, c__Chlamydiia, o__	0.0363412		Niabella	k__Bacteria, p__Bacteroidetes, c__[Saprospirae], o__[Saprospirales], f__Chitinophagaceae, g__Niabella	0.141731
								Chlamydiales	k__Bacteria, p__Chlamydiae, c__Chlamydiia, o__Chlamydiales	0.0363412		{Unknown Family} DH61	k__Bacteria, p__Planctomycetes, c__vadinHA49, o__DH61, f__, g__	0.141731
								B07_WMSP1	k__Bacteria, p__Chloroflexi, c__TK10, o__B07_WMSP1	0.0363412		{Unknown Genus} Kineosporiaceae	k__Bacteria, p__Actinobacteria, c__Actinobacteria, o__Actinomycetales, f__Kineosporiaceae, g__	0.138096
								{Unknown Order} ZB2	k__Bacteria, p__OD1, c__ZB2, o__	0.0363412		Mesorhizobium	k__Bacteria, p__Proteobacteria, c__Alphaproteobacteria, o__Rhizobiales, f__Phyllobacteriaceae, g__Mesorhizobium	0.138096
								Kiloniellales	k__Bacteria, p__Proteobacteria, c__Alphaproteobacteria, o__Kiloniellales	0.0363412		{Unknown Genus} Rhizobiaceae	k__Bacteria, p__Proteobacteria, c__Alphaproteobacteria, o__Rhizobiales, f__Rhizobiaceae, g__	0.134462
								FAC88	k__Bacteria, p__Elusimicrobia, c__Elusimicrobia, o__FAC88	0.0327071		{Unknown Class} Verrucomicrobia	k__Bacteria, p__Verrucomicrobia, c__, o__, f__, g__	0.119926
								MIZ46	k__Bacteria, p__Proteobacteria, c__Deltaproteobacteria, o__MIZ46	0.0327071		{Unknown Genus} S47	k__Bacteria, p__Chloroflexi, c__Anaerolineae, o__A31, f__S47, g__	0.116292
								{Unknown Order} TM7-3	k__Bacteria, p__TM7, c__TM7-3, o__	0.0327071		{Unknown Genus} Dolo_23	k__Bacteria, p__Chloroflexi, c__TK10, o__AKYG885, f__Dolo_23, g__	0.109024
								{Unknown Order} GKS2-174	k__Bacteria, p__GN02, c__GKS2-174, o__	0.0290729		Ochrobactrum	k__Bacteria, p__Proteobacteria, c__Alphaproteobacteria, o__Rhizobiales, f__Brucellaceae, g__Ochrobactrum	0.109024
								{Unknown Class} Proteobacteria	k__Bacteria, p__Proteobacteria, c__, o__	0.0290729		Steroidobacter	k__Bacteria, p__Proteobacteria, c__Gammaproteobacteria, o__Xanthomonadales, f__Sinobacteraceae, g__Steroidobacter	0.109024
								{Unknown Order} Gammaproteobacteria	k__Bacteria, p__Proteobacteria, c__Gammaproteobacteria, o__	0.0290729		{Unknown Genus} Sphingobacteriaceae	k__Bacteria, p__Bacteroidetes, c__Sphingobacteriia, o__Sphingobacteriales, f__Sphingobacteriaceae, g__	0.105389
								{Unknown Order} Opitutae	k__Bacteria, p__Verrucomicrobia, c__Opitutae, o__	0.0290729		{Unknown Genus} HTCC2089	k__Bacteria, p__Proteobacteria, c__Gammaproteobacteria, o__HTCC2188, f__HTCC2089, g__	0.105389
								Clostridiales	k__Bacteria, p__Firmicutes, c__Clostridia, o__Clostridiales	0.0254388		Chthoniobacter	k__Bacteria, p__Verrucomicrobia, c__[Spartobacteria], o__[Chthoniobacterales], f__[Chthoniobacteraceae], g__Chthoniobacter	0.101755
								PK29	k__Bacteria, p__Acidobacteria, c__[Chloracidobacteria], o__PK29	0.0218047		Solirubrobacter	k__Bacteria, p__Actinobacteria, c__Thermoleophilia, o__Solirubrobacterales, f__Solirubrobacteraceae, g__Solirubrobacter	0.0981212
								[Roseiflexales]	k__Bacteria, p__Chloroflexi, c__Chloroflexi, o__[Roseiflexales]	0.0218047		Pontibacter	k__Bacteria, p__Bacteroidetes, c__Cytophagia, o__Cytophagales, f__Cytophagaceae, g__Pontibacter	0.0981212
								{Unknown Order} Gemm-3	k__Bacteria, p__Gemmatimonadetes, c__Gemm-3, o__	0.0218047		{Unknown Family} Herpetosiphonales	k__Bacteria, p__Chloroflexi, c__Chloroflexi, o__Herpetosiphonales, f__, g__	0.0981212
								BD7-3	k__Bacteria, p__Proteobacteria, c__Alphaproteobacteria, o__BD7-3	0.0218047		Dokdonella	k__Bacteria, p__Proteobacteria, c__Gammaproteobacteria, o__Xanthomonadales, f__Xanthomonadaceae, g__Dokdonella	0.0981212
								Rickettsiales	k__Bacteria, p__Proteobacteria, c__Alphaproteobacteria, o__Rickettsiales	0.0218047		Gemmata	k__Bacteria, p__Planctomycetes, c__Planctomycetia, o__Gemmatales, f__Gemmataceae, g__Gemmata	0.094487
								Methylophilales	k__Bacteria, p__Proteobacteria, c__Betaproteobacteria, o__Methylophilales	0.0218047		{Unknown Genus} R4-41B	k__Bacteria, p__Verrucomicrobia, c__[Pedosphaerae], o__[Pedosphaerales], f__R4-41B, g__	0.094487
								Procabacteriales	k__Bacteria, p__Proteobacteria, c__Betaproteobacteria, o__Procabacteriales	0.0218047		{Unknown Genus} Microthrixaceae	k__Bacteria, p__Actinobacteria, c__Acidimicrobiia, o__Acidimicrobiales, f__Microthrixaceae, g__	0.0908529
								Enterobacteriales	k__Bacteria, p__Proteobacteria, c__Gammaproteobacteria, o__Enterobacteriales	0.0218047		{Unknown Order} S085	k__Bacteria, p__Chloroflexi, c__S085, o__, f__, g__	0.0908529
								{Unknown Order} SJA-4	k__Bacteria, p__TM6, c__SJA-4, o__	0.0218047		{Unknown Order} Gemm-5	k__Bacteria, p__Gemmatimonadetes, c__Gemm-5, o__, f__, g__	0.0908529
								LD1-PA13	k__Bacteria, p__WS3, c__PRR-12, o__LD1-PA13	0.0218047		{Unknown Genus} Gemmataceae	k__Bacteria, p__Planctomycetes, c__Planctomycetia, o__Gemmatales, f__Gemmataceae, g__	0.0908529
								{Unknown Order} B142	k__Bacteria, p__WS6, c__B142, o__	0.0218047		OR-59	k__Bacteria, p__Verrucomicrobia, c__[Spartobacteria], o__[Chthoniobacterales], f__[Chthoniobacteraceae], g__OR-59	0.0908529
								{Unknown Order} SC72	k__Bacteria, p__WS6, c__SC72, o__	0.0218047		Terracoccus	k__Bacteria, p__Actinobacteria, c__Actinobacteria, o__Actinomycetales, f__Intrasporangiaceae, g__Terracoccus	0.0872188
								N/A	N/A	0.0218047		{Unknown Order} TK17	k__Bacteria, p__Chloroflexi, c__TK17, o__, f__, g__	0.0872188
								Chlorophyta	k__Bacteria, p__Cyanobacteria, c__Chloroplast, o__Chlorophyta	0.0181706		{Unknown Order} 3BR-5F	k__Bacteria, p__GN02, c__3BR-5F, o__, f__, g__	0.0872188
								{Unknown Order} BPC102	k__Bacteria, p__Acidobacteria, c__BPC102, o__	0.0145365		{Unknown Family} Phycisphaerales	k__Bacteria, p__Planctomycetes, c__Phycisphaerae, o__Phycisphaerales, f__, g__	0.0872188
								DS-18	k__Bacteria, p__Acidobacteria, c__iii1-8, o__DS-18	0.0145365		{Unknown Family} MND1	k__Bacteria, p__Proteobacteria, c__Betaproteobacteria, o__MND1, f__, g__	0.0872188
								Rubrobacterales	k__Bacteria, p__Actinobacteria, c__Rubrobacteria, o__Rubrobacterales	0.0145365		{Unknown Genus} Hyphomonadaceae	k__Bacteria, p__Proteobacteria, c__Alphaproteobacteria, o__Rhodobacterales, f__Hyphomonadaceae, g__	0.0835847
								{Unknown Order} 0319-6E2	k__Bacteria, p__Armatimonadetes, c__0319-6E2, o__	0.0145365		Pseudonocardia	k__Bacteria, p__Actinobacteria, c__Actinobacteria, o__Actinomycetales, f__Pseudonocardiaceae, g__Pseudonocardia	0.0799506
								{Unknown Class} BHI80-139	k__Bacteria, p__BHI80-139, c__, o__	0.0145365		Paenibacillus	k__Bacteria, p__Firmicutes, c__Bacilli, o__Bacillales, f__Paenibacillaceae, g__Paenibacillus	0.0799506
								{Unknown Order} PRR-11	k__Bacteria, p__BRC1, c__PRR-11, o__	0.0145365		Nitrospira	k__Bacteria, p__Nitrospirae, c__Nitrospira, o__Nitrospirales, f__Nitrospiraceae, g__Nitrospira	0.0799506
								Streptophyta	k__Bacteria, p__Cyanobacteria, c__Chloroplast, o__Streptophyta	0.0145365		Bdellovibrio	k__Bacteria, p__Proteobacteria, c__Deltaproteobacteria, o__Bdellovibrionales, f__Bdellovibrionaceae, g__Bdellovibrio	0.0799506
								d153	k__Bacteria, p__OP11, c__WCHB1-64, o__d153	0.0145365		{Unknown Genus} Caldilineaceae	k__Bacteria, p__Chloroflexi, c__Anaerolineae, o__Caldilineales, f__Caldilineaceae, g__	0.0763165
								NB1-j	k__Bacteria, p__Proteobacteria, c__Deltaproteobacteria, o__NB1-j	0.0145365		{Unknown Class} Planctomycetes	k__Bacteria, p__Planctomycetes, c__, o__, f__, g__	0.0763165
								Oceanospirillales	k__Bacteria, p__Proteobacteria, c__Gammaproteobacteria, o__Oceanospirillales	0.0145365		Mycobacterium	k__Bacteria, p__Actinobacteria, c__Actinobacteria, o__Actinomycetales, f__Mycobacteriaceae, g__Mycobacterium	0.0726823
								PHOS-HD29	k__Bacteria, p__Proteobacteria, c__TA18, o__PHOS-HD29	0.0145365		{Unknown Genus} Caulobacteraceae	k__Bacteria, p__Proteobacteria, c__Alphaproteobacteria, o__Caulobacterales, f__Caulobacteraceae, g__	0.0726823
								AKYG1722	k__Bacteria, p__Chloroflexi, c__Thermomicrobia, o__AKYG1722	0.0109024		Streptomyces	k__Bacteria, p__Actinobacteria, c__Actinobacteria, o__Actinomycetales, f__Streptomycetaceae, g__Streptomyces	0.0690482
								{Unknown Order} WCHB1-64	k__Bacteria, p__OP11, c__WCHB1-64, o__	0.0109024		{Unknown Family} Gemmatimonadales	k__Bacteria, p__Gemmatimonadetes, c__Gemmatimonadetes, o__Gemmatimonadales, f__, g__	0.0690482
								Neisseriales	k__Bacteria, p__Proteobacteria, c__Betaproteobacteria, o__Neisseriales	0.0109024		{Unknown Genus} Aeromonadaceae	k__Bacteria, p__Proteobacteria, c__Gammaproteobacteria, o__Aeromonadales, f__Aeromonadaceae, g__	0.0690482
								YC-E6	k__Archaea, p__Euryarchaeota, c__Methanomicrobia, o__YC-E6	0.00726823		{Unknown Family} KD8-87	k__Bacteria, p__Gemmatimonadetes, c__Gemmatimonadetes, o__KD8-87, f__, g__	0.0654141
								DS-100	k__Bacteria, p__Acidobacteria, c__[Chloracidobacteria], o__DS-100	0.00726823		{Unknown Genus} UD5	k__Bacteria, p__Proteobacteria, c__Betaproteobacteria, o__A21b, f__UD5, g__	0.0654141
								Acidobacteriales	k__Bacteria, p__Acidobacteria, c__Acidobacteriia, o__Acidobacteriales	0.00726823		{Unknown Genus} Coxiellaceae	k__Bacteria, p__Proteobacteria, c__Gammaproteobacteria, o__Legionellales, f__Coxiellaceae, g__	0.0654141
								Ellin6513	k__Bacteria, p__Acidobacteria, c__DA052, o__Ellin6513	0.00726823		{Unknown Class} Acidobacteria	k__Bacteria, p__Acidobacteria, c__, o__, f__, g__	0.06178
								[Fimbriimonadales]	k__Bacteria, p__Armatimonadetes, c__[Fimbriimonadia], o__[Fimbriimonadales]	0.00726823		{Unknown Class} OD1	k__Bacteria, p__OD1, c__, o__, f__, g__	0.06178
								FW68	k__Bacteria, p__Armatimonadetes, c__Armatimonadia, o__FW68	0.00726823		{Unknown Family} H39	k__Bacteria, p__Chloroflexi, c__Anaerolineae, o__H39, f__, g__	0.0581459
								GAB-B06	k__Bacteria, p__Armatimonadetes, c__SJA-176, o__GAB-B06	0.00726823		{Unknown Family} Stramenopiles	k__Bacteria, p__Cyanobacteria, c__Chloroplast, o__Stramenopiles, f__, g__	0.0581459
								{Unknown Order} At12OctB3	k__Bacteria, p__Bacteroidetes, c__At12OctB3, o__	0.00726823		Burkholderia	k__Bacteria, p__Proteobacteria, c__Betaproteobacteria, o__Burkholderiales, f__Burkholderiaceae, g__Burkholderia	0.0581459
								CFB-26	k__Bacteria, p__Chloroflexi, c__Anaerolineae, o__CFB-26	0.00726823		Plesiocystis	k__Bacteria, p__Proteobacteria, c__Deltaproteobacteria, o__Myxococcales, f__Nannocystaceae, g__Plesiocystis	0.0581459
								envOPS12	k__Bacteria, p__Chloroflexi, c__Anaerolineae, o__envOPS12	0.00726823		Gordonia	k__Bacteria, p__Actinobacteria, c__Actinobacteria, o__Actinomycetales, f__Gordoniaceae, g__Gordonia	0.0545118
								{Unknown Order} P2-11E	k__Bacteria, p__Chloroflexi, c__P2-11E, o__	0.00726823		{Unknown Genus} A4b	k__Bacteria, p__Chloroflexi, c__Anaerolineae, o__SBR1031, f__A4b, g__	0.0545118
								{Unknown Order} SHA-26	k__Bacteria, p__Chloroflexi, c__SHA-26, o__	0.00726823		Bacillus	k__Bacteria, p__Firmicutes, c__Bacilli, o__Bacillales, f__Bacillaceae, g__Bacillus	0.0545118
								{Unknown Order} TK10	k__Bacteria, p__Chloroflexi, c__TK10, o__	0.00726823		DA101	k__Bacteria, p__Verrucomicrobia, c__[Spartobacteria], o__[Chthoniobacterales], f__[Chthoniobacteraceae], g__DA101	0.0545118
								MLE1-12	k__Bacteria, p__Cyanobacteria, c__4C0d-2, o__MLE1-12	0.00726823		{Unknown Order} Actinobacteria	k__Bacteria, p__Actinobacteria, c__Actinobacteria, o__, f__, g__	0.0508776
								{Unknown Order} ML635J-21	k__Bacteria, p__Cyanobacteria, c__ML635J-21, o__	0.00726823		Verrucosispora	k__Bacteria, p__Actinobacteria, c__Actinobacteria, o__Actinomycetales, f__Micromonosporaceae, g__Verrucosispora	0.0508776
								Elusimicrobiales	k__Bacteria, p__Elusimicrobia, c__Elusimicrobia, o__Elusimicrobiales	0.00726823		{Unknown Genus} Streptomycetaceae	k__Bacteria, p__Actinobacteria, c__Actinobacteria, o__Actinomycetales, f__Streptomycetaceae, g__	0.0508776
								{Unknown Class} FCPU426	k__Bacteria, p__FCPU426, c__, o__	0.00726823		{Unknown Genus} 0319-6A21	k__Bacteria, p__Nitrospirae, c__Nitrospira, o__Nitrospirales, f__0319-6A21, g__	0.0508776
								{Unknown Class} Kazan-3B-28	k__Bacteria, p__Kazan-3B-28, c__, o__	0.00726823		Brevundimonas	k__Bacteria, p__Proteobacteria, c__Alphaproteobacteria, o__Caulobacterales, f__Caulobacteraceae, g__Brevundimonas	0.0508776
								Lentisphaerales	k__Bacteria, p__Lentisphaerae, c__[Lentisphaeria], o__Lentisphaerales	0.00726823		{Unknown Genus} Methylocystaceae	k__Bacteria, p__Proteobacteria, c__Alphaproteobacteria, o__Rhizobiales, f__Methylocystaceae, g__	0.0508776
								{Unknown Order} SM2F11	k__Bacteria, p__OD1, c__SM2F11, o__	0.00726823		{Unknown Genus} Alcaligenaceae	k__Bacteria, p__Proteobacteria, c__Betaproteobacteria, o__Burkholderiales, f__Alcaligenaceae, g__	0.0508776
								{Unknown Order} BD7-11	k__Bacteria, p__Planctomycetes, c__BD7-11, o__	0.00726823		{Unknown Family} Acidithiobacillales	k__Bacteria, p__Proteobacteria, c__Gammaproteobacteria, o__Acidithiobacillales, f__, g__	0.0508776
								mle1-8	k__Bacteria, p__Planctomycetes, c__Phycisphaerae, o__mle1-8	0.00726823		Cellvibrio	k__Bacteria, p__Proteobacteria, c__Gammaproteobacteria, o__Alteromonadales, f__Alteromonadaceae, g__Cellvibrio	0.0508776
								{Unknown Order} Pla3	k__Bacteria, p__Planctomycetes, c__Pla3, o__	0.00726823		{Unknown Family} Legionellales	k__Bacteria, p__Proteobacteria, c__Gammaproteobacteria, o__Legionellales, f__, g__	0.0508776
								Nitrosomonadales	k__Bacteria, p__Proteobacteria, c__Betaproteobacteria, o__Nitrosomonadales	0.00726823		{Unknown Genus} Ellin517	k__Bacteria, p__Verrucomicrobia, c__[Pedosphaerae], o__[Pedosphaerales], f__Ellin517, g__	0.0508776
								SBla14	k__Bacteria, p__Proteobacteria, c__Betaproteobacteria, o__SBla14	0.00726823		{Unknown Family} 258ds10	k__Bacteria, p__Fibrobacteres, c__Fibrobacteria, o__258ds10, f__, g__	0.0472435
								{Unknown Order} Deltaproteobacteria	k__Bacteria, p__Proteobacteria, c__Deltaproteobacteria, o__	0.00726823		Pedomicrobium	k__Bacteria, p__Proteobacteria, c__Alphaproteobacteria, o__Rhizobiales, f__Hyphomicrobiaceae, g__Pedomicrobium	0.0472435
								[Entotheonellales]	k__Bacteria, p__Proteobacteria, c__Deltaproteobacteria, o__[Entotheonellales]	0.00726823		{Unknown Genus} Phyllobacteriaceae	k__Bacteria, p__Proteobacteria, c__Alphaproteobacteria, o__Rhizobiales, f__Phyllobacteriaceae, g__	0.0472435
								FAC87	k__Bacteria, p__Proteobacteria, c__Deltaproteobacteria, o__FAC87	0.00726823		Janthinobacterium	k__Bacteria, p__Proteobacteria, c__Betaproteobacteria, o__Burkholderiales, f__Oxalobacteraceae, g__Janthinobacterium	0.0472435
								Spirobacillales	k__Bacteria, p__Proteobacteria, c__Deltaproteobacteria, o__Spirobacillales	0.00726823		{Unknown Genus} Pseudonocardiaceae	k__Bacteria, p__Actinobacteria, c__Actinobacteria, o__Actinomycetales, f__Pseudonocardiaceae, g__	0.0436094
								CV90	k__Bacteria, p__Proteobacteria, c__TA18, o__CV90	0.00726823		{Unknown Family} AKIW781	k__Bacteria, p__Chloroflexi, c__Chloroflexi, o__AKIW781, f__, g__	0.0436094
								{Unknown Order} Mollicutes	k__Bacteria, p__Tenericutes, c__Mollicutes, o__	0.00726823		{Unknown Order} Gemm-2	k__Bacteria, p__Gemmatimonadetes, c__Gemm-2, o__, f__, g__	0.0436094
								EW055	k__Bacteria, p__TM7, c__TM7-3, o__EW055	0.00726823		{Unknown Family} Solibacterales	k__Bacteria, p__Acidobacteria, c__Solibacteres, o__Solibacterales, f__, g__	0.0399753
								S-BQ2-57	k__Bacteria, p__Verrucomicrobia, c__[Methylacidiphilae], o__S-BQ2-57	0.00726823		Catellatospora	k__Bacteria, p__Actinobacteria, c__Actinobacteria, o__Actinomycetales, f__Micromonosporaceae, g__Catellatospora	0.0399753
												{Unknown Order} SJA-28	k__Bacteria, p__Chlorobi, c__SJA-28, o__, f__, g__	0.0399753
												{Unknown Genus} Ellin5301	k__Bacteria, p__Gemmatimonadetes, c__Gemmatimonadetes, o__Gemmatimonadales, f__Ellin5301, g__	0.0399753
												{Unknown Order} Pla4	k__Bacteria, p__Planctomycetes, c__Pla4, o__, f__, g__	0.0399753
												{Unknown Family} B97	k__Bacteria, p__Planctomycetes, c__Planctomycetia, o__B97, f__, g__	0.0399753
												{Unknown Family} Caulobacterales	k__Bacteria, p__Proteobacteria, c__Alphaproteobacteria, o__Caulobacterales, f__, g__	0.0399753
												{Unknown Genus} Bacteriovoracaceae	k__Bacteria, p__Proteobacteria, c__Deltaproteobacteria, o__Bdellovibrionales, f__Bacteriovoracaceae, g__	0.0399753
												{Unknown Order} RB25	k__Bacteria, p__Acidobacteria, c__RB25, o__, f__, g__	0.0363412
												{Unknown Genus} Micromonosporaceae	k__Bacteria, p__Actinobacteria, c__Actinobacteria, o__Actinomycetales, f__Micromonosporaceae, g__	0.0363412
												Rhodococcus	k__Bacteria, p__Actinobacteria, c__Actinobacteria, o__Actinomycetales, f__Nocardiaceae, g__Rhodococcus	0.0363412
												Nocardioides	k__Bacteria, p__Actinobacteria, c__Actinobacteria, o__Actinomycetales, f__Nocardioidaceae, g__Nocardioides	0.0363412
												{Unknown Order} Chlamydiia	k__Bacteria, p__Chlamydiae, c__Chlamydiia, o__, f__, g__	0.0363412
												{Unknown Family} B07_WMSP1	k__Bacteria, p__Chloroflexi, c__TK10, o__B07_WMSP1, f__, g__	0.0363412
												{Unknown Order} ZB2	k__Bacteria, p__OD1, c__ZB2, o__, f__, g__	0.0363412
												{Unknown Family} Kiloniellales	k__Bacteria, p__Proteobacteria, c__Alphaproteobacteria, o__Kiloniellales, f__, g__	0.0363412
												Agrobacterium	k__Bacteria, p__Proteobacteria, c__Alphaproteobacteria, o__Rhizobiales, f__Rhizobiaceae, g__Agrobacterium	0.0363412
												{Unknown Genus} ACK-M1	k__Bacteria, p__Actinobacteria, c__Actinobacteria, o__Actinomycetales, f__ACK-M1, g__	0.0327071
												Arthrobacter	k__Bacteria, p__Actinobacteria, c__Actinobacteria, o__Actinomycetales, f__Micrococcaceae, g__Arthrobacter	0.0327071
												{Unknown Family} FAC88	k__Bacteria, p__Elusimicrobia, c__Elusimicrobia, o__FAC88, f__, g__	0.0327071
												{Unknown Family} MIZ46	k__Bacteria, p__Proteobacteria, c__Deltaproteobacteria, o__MIZ46, f__, g__	0.0327071
												{Unknown Order} TM7-3	k__Bacteria, p__TM7, c__TM7-3, o__, f__, g__	0.0327071
												{Unknown Order} GKS2-174	k__Bacteria, p__GN02, c__GKS2-174, o__, f__, g__	0.0290729
												{Unknown Class} Proteobacteria	k__Bacteria, p__Proteobacteria, c__, o__, f__, g__	0.0290729
												{Unknown Genus} Erythrobacteraceae	k__Bacteria, p__Proteobacteria, c__Alphaproteobacteria, o__Sphingomonadales, f__Erythrobacteraceae, g__	0.0290729
												{Unknown Genus} Rhodocyclaceae	k__Bacteria, p__Proteobacteria, c__Betaproteobacteria, o__Rhodocyclales, f__Rhodocyclaceae, g__	0.0290729
												Dok59	k__Bacteria, p__Proteobacteria, c__Betaproteobacteria, o__Rhodocyclales, f__Rhodocyclaceae, g__Dok59	0.0290729
												{Unknown Order} Gammaproteobacteria	k__Bacteria, p__Proteobacteria, c__Gammaproteobacteria, o__, f__, g__	0.0290729
												Aquicella	k__Bacteria, p__Proteobacteria, c__Gammaproteobacteria, o__Legionellales, f__Coxiellaceae, g__Aquicella	0.0290729
												{Unknown Order} Opitutae	k__Bacteria, p__Verrucomicrobia, c__Opitutae, o__, f__, g__	0.0290729
												{Unknown Genus} PRR-10	k__Bacteria, p__WS3, c__PRR-12, o__Sediment-1, f__PRR-10, g__	0.0290729
												{Unknown Genus} Oxalobacteraceae	k__Bacteria, p__Proteobacteria, c__Betaproteobacteria, o__Burkholderiales, f__Oxalobacteraceae, g__	0.0254388
												{Unknown Family} PK29	k__Bacteria, p__Acidobacteria, c__[Chloracidobacteria], o__PK29, f__, g__	0.0218047
												{Unknown Genus} ZA3409c	k__Bacteria, p__Actinobacteria, c__Acidimicrobiia, o__Acidimicrobiales, f__ZA3409c, g__	0.0218047
												Nocardia	k__Bacteria, p__Actinobacteria, c__Actinobacteria, o__Actinomycetales, f__Nocardiaceae, g__Nocardia	0.0218047
												{Unknown Genus} Patulibacteraceae	k__Bacteria, p__Actinobacteria, c__Thermoleophilia, o__Solirubrobacterales, f__Patulibacteraceae, g__	0.0218047
												Flavisolibacter	k__Bacteria, p__Bacteroidetes, c__[Saprospirae], o__[Saprospirales], f__Chitinophagaceae, g__Flavisolibacter	0.0218047
												{Unknown Genus} Cryomorphaceae	k__Bacteria, p__Bacteroidetes, c__Flavobacteriia, o__Flavobacteriales, f__Cryomorphaceae, g__	0.0218047
												{Unknown Order} Gemm-3	k__Bacteria, p__Gemmatimonadetes, c__Gemm-3, o__, f__, g__	0.0218047
												{Unknown Family} BD7-3	k__Bacteria, p__Proteobacteria, c__Alphaproteobacteria, o__BD7-3, f__, g__	0.0218047
												Hyphomicrobium	k__Bacteria, p__Proteobacteria, c__Alphaproteobacteria, o__Rhizobiales, f__Hyphomicrobiaceae, g__Hyphomicrobium	0.0218047
												Anaerospora	k__Bacteria, p__Proteobacteria, c__Alphaproteobacteria, o__Rhodobacterales, f__Rhodobacteraceae, g__Anaerospora	0.0218047
												Acidiphilium	k__Bacteria, p__Proteobacteria, c__Alphaproteobacteria, o__Rhodospirillales, f__Acetobacteraceae, g__Acidiphilium	0.0218047
												{Unknown Family} Rickettsiales	k__Bacteria, p__Proteobacteria, c__Alphaproteobacteria, o__Rickettsiales, f__, g__	0.0218047
												{Unknown Genus} Procabacteriaceae	k__Bacteria, p__Proteobacteria, c__Betaproteobacteria, o__Procabacteriales, f__Procabacteriaceae, g__	0.0218047
												{Unknown Genus} Cystobacterineae	k__Bacteria, p__Proteobacteria, c__Deltaproteobacteria, o__Myxococcales, f__Cystobacterineae, g__	0.0218047
												Nannocystis	k__Bacteria, p__Proteobacteria, c__Deltaproteobacteria, o__Myxococcales, f__Nannocystaceae, g__Nannocystis	0.0218047
												{Unknown Genus} Legionellaceae	k__Bacteria, p__Proteobacteria, c__Gammaproteobacteria, o__Legionellales, f__Legionellaceae, g__	0.0218047
												{Unknown Order} SJA-4	k__Bacteria, p__TM6, c__SJA-4, o__, f__, g__	0.0218047
												{Unknown Family} LD1-PA13	k__Bacteria, p__WS3, c__PRR-12, o__LD1-PA13, f__, g__	0.0218047
												{Unknown Order} B142	k__Bacteria, p__WS6, c__B142, o__, f__, g__	0.0218047
												{Unknown Order} SC72	k__Bacteria, p__WS6, c__SC72, o__, f__, g__	0.0218047
												N/A	N/A	0.0218047
												Propionibacterium	k__Bacteria, p__Actinobacteria, c__Actinobacteria, o__Actinomycetales, f__Propionibacteriaceae, g__Propionibacterium	0.0181706
												Patulibacter	k__Bacteria, p__Actinobacteria, c__Thermoleophilia, o__Solirubrobacterales, f__Patulibacteraceae, g__Patulibacter	0.0181706
												{Unknown Genus} Acetobacteraceae	k__Bacteria, p__Proteobacteria, c__Alphaproteobacteria, o__Rhodospirillales, f__Acetobacteraceae, g__	0.0181706
												Stenotrophomonas-2	k__Bacteria, p__Proteobacteria, c__Gammaproteobacteria, o__Xanthomonadales, f__Xanthomonadaceae, g__Stenotrophomonas	0.0181706
												{Unknown Order} BPC102	k__Bacteria, p__Acidobacteria, c__BPC102, o__, f__, g__	0.0145365
												{Unknown Family} DS-18	k__Bacteria, p__Acidobacteria, c__iii1-8, o__DS-18, f__, g__	0.0145365
												{Unknown Genus} AKIW659	k__Bacteria, p__Acidobacteria, c__Solibacteres, o__Solibacterales, f__AKIW659, g__	0.0145365
												Candidatus Solibacter	k__Bacteria, p__Acidobacteria, c__Solibacteres, o__Solibacterales, f__Solibacteraceae, g__Candidatus Solibacter	0.0145365
												{Unknown Genus} Iamiaceae	k__Bacteria, p__Actinobacteria, c__Acidimicrobiia, o__Acidimicrobiales, f__Iamiaceae, g__	0.0145365
												Nonomuraea	k__Bacteria, p__Actinobacteria, c__Actinobacteria, o__Actinomycetales, f__Streptosporangiaceae, g__Nonomuraea	0.0145365
												{Unknown Family} Gaiellales	k__Bacteria, p__Actinobacteria, c__Thermoleophilia, o__Gaiellales, f__, g__	0.0145365
												{Unknown Genus} AK1AB1_02E	k__Bacteria, p__Actinobacteria, c__Thermoleophilia, o__Gaiellales, f__AK1AB1_02E, g__	0.0145365
												{Unknown Order} 0319-6E2	k__Bacteria, p__Armatimonadetes, c__0319-6E2, o__, f__, g__	0.0145365
												{Unknown Genus} Flammeovirgaceae	k__Bacteria, p__Bacteroidetes, c__Cytophagia, o__Cytophagales, f__Flammeovirgaceae, g__	0.0145365
												Fluviicola	k__Bacteria, p__Bacteroidetes, c__Flavobacteriia, o__Flavobacteriales, f__Cryomorphaceae, g__Fluviicola	0.0145365
												{Unknown Class} BHI80-139	k__Bacteria, p__BHI80-139, c__, o__, f__, g__	0.0145365
												{Unknown Order} PRR-11	k__Bacteria, p__BRC1, c__PRR-11, o__, f__, g__	0.0145365
												{Unknown Family} Chlamydiales	k__Bacteria, p__Chlamydiae, c__Chlamydiia, o__Chlamydiales, f__, g__	0.0145365
												{Unknown Genus} Parachlamydiaceae	k__Bacteria, p__Chlamydiae, c__Chlamydiia, o__Chlamydiales, f__Parachlamydiaceae, g__	0.0145365
												{Unknown Genus} [Kouleothrixaceae]	k__Bacteria, p__Chloroflexi, c__Chloroflexi, o__[Roseiflexales], f__[Kouleothrixaceae], g__	0.0145365
												{Unknown Family} Streptophyta	k__Bacteria, p__Cyanobacteria, c__Chloroplast, o__Streptophyta, f__, g__	0.0145365
												Alicyclobacillus	k__Bacteria, p__Firmicutes, c__Bacilli, o__Bacillales, f__Alicyclobacillaceae, g__Alicyclobacillus	0.0145365
												{Unknown Genus} Paenibacillaceae	k__Bacteria, p__Firmicutes, c__Bacilli, o__Bacillales, f__Paenibacillaceae, g__	0.0145365
												{Unknown Family} d153	k__Bacteria, p__OP11, c__WCHB1-64, o__d153, f__, g__	0.0145365
												{Unknown Genus} Methylobacteriaceae	k__Bacteria, p__Proteobacteria, c__Alphaproteobacteria, o__Rhizobiales, f__Methylobacteriaceae, g__	0.0145365
												Rhodobacter	k__Bacteria, p__Proteobacteria, c__Alphaproteobacteria, o__Rhodobacterales, f__Rhodobacteraceae, g__Rhodobacter	0.0145365
												{Unknown Family} Sphingomonadales	k__Bacteria, p__Proteobacteria, c__Alphaproteobacteria, o__Sphingomonadales, f__, g__	0.0145365
												Blastomonas	k__Bacteria, p__Proteobacteria, c__Alphaproteobacteria, o__Sphingomonadales, f__Sphingomonadaceae, g__Blastomonas	0.0145365
												Rhodoferax	k__Bacteria, p__Proteobacteria, c__Betaproteobacteria, o__Burkholderiales, f__Comamonadaceae, g__Rhodoferax	0.0145365
												{Unknown Genus} Methylophilaceae	k__Bacteria, p__Proteobacteria, c__Betaproteobacteria, o__Methylophilales, f__Methylophilaceae, g__	0.0145365
												Uliginosibacterium	k__Bacteria, p__Proteobacteria, c__Betaproteobacteria, o__Rhodocyclales, f__Rhodocyclaceae, g__Uliginosibacterium	0.0145365
												{Unknown Family} NB1-j	k__Bacteria, p__Proteobacteria, c__Deltaproteobacteria, o__NB1-j, f__, g__	0.0145365
												{Unknown Genus} OM60	k__Bacteria, p__Proteobacteria, c__Gammaproteobacteria, o__Alteromonadales, f__OM60, g__	0.0145365
												{Unknown Genus} Halomonadaceae	k__Bacteria, p__Proteobacteria, c__Gammaproteobacteria, o__Oceanospirillales, f__Halomonadaceae, g__	0.0145365
												{Unknown Family} PHOS-HD29	k__Bacteria, p__Proteobacteria, c__TA18, o__PHOS-HD29, f__, g__	0.0145365
												{Unknown Genus} 01D2Z36	k__Bacteria, p__Verrucomicrobia, c__[Spartobacteria], o__[Chthoniobacterales], f__01D2Z36, g__	0.0145365
												Leucobacter	k__Bacteria, p__Actinobacteria, c__Actinobacteria, o__Actinomycetales, f__Microbacteriaceae, g__Leucobacter	0.0109024
												{Unknown Family} AKYG1722	k__Bacteria, p__Chloroflexi, c__Thermomicrobia, o__AKYG1722, f__, g__	0.0109024
												{Unknown Genus} Trebouxiophyceae	k__Bacteria, p__Cyanobacteria, c__Chloroplast, o__Chlorophyta, f__Trebouxiophyceae, g__	0.0109024
												{Unknown Order} WCHB1-64	k__Bacteria, p__OP11, c__WCHB1-64, o__, f__, g__	0.0109024
												{Unknown Genus} Neisseriaceae	k__Bacteria, p__Proteobacteria, c__Betaproteobacteria, o__Neisseriales, f__Neisseriaceae, g__	0.0109024
												{Unknown Family} YC-E6	k__Archaea, p__Euryarchaeota, c__Methanomicrobia, o__YC-E6, f__, g__	0.00726823
												{Unknown Family} DS-100	k__Bacteria, p__Acidobacteria, c__[Chloracidobacteria], o__DS-100, f__, g__	0.00726823
												{Unknown Genus} Koribacteraceae	k__Bacteria, p__Acidobacteria, c__Acidobacteriia, o__Acidobacteriales, f__Koribacteraceae, g__	0.00726823
												{Unknown Family} Ellin6513	k__Bacteria, p__Acidobacteria, c__DA052, o__Ellin6513, f__, g__	0.00726823
												Cellulomonas	k__Bacteria, p__Actinobacteria, c__Actinobacteria, o__Actinomycetales, f__Cellulomonadaceae, g__Cellulomonas	0.00726823
												{Unknown Genus} Frankiaceae	k__Bacteria, p__Actinobacteria, c__Actinobacteria, o__Actinomycetales, f__Frankiaceae, g__	0.00726823
												Solwaraspora	k__Bacteria, p__Actinobacteria, c__Actinobacteria, o__Actinomycetales, f__Micromonosporaceae, g__Solwaraspora	0.00726823
												{Unknown Genus} Rubrobacteraceae	k__Bacteria, p__Actinobacteria, c__Rubrobacteria, o__Rubrobacterales, f__Rubrobacteraceae, g__	0.00726823
												Rubrobacter	k__Bacteria, p__Actinobacteria, c__Rubrobacteria, o__Rubrobacterales, f__Rubrobacteraceae, g__Rubrobacter	0.00726823
												{Unknown Genus} [Fimbriimonadaceae]	k__Bacteria, p__Armatimonadetes, c__[Fimbriimonadia], o__[Fimbriimonadales], f__[Fimbriimonadaceae], g__	0.00726823
												{Unknown Family} FW68	k__Bacteria, p__Armatimonadetes, c__Armatimonadia, o__FW68, f__, g__	0.00726823
												{Unknown Family} GAB-B06	k__Bacteria, p__Armatimonadetes, c__SJA-176, o__GAB-B06, f__, g__	0.00726823
												Filimonas	k__Bacteria, p__Bacteroidetes, c__[Saprospirae], o__[Saprospirales], f__Chitinophagaceae, g__Filimonas	0.00726823
												Flavihumibacter	k__Bacteria, p__Bacteroidetes, c__[Saprospirae], o__[Saprospirales], f__Chitinophagaceae, g__Flavihumibacter	0.00726823
												Lacibacter	k__Bacteria, p__Bacteroidetes, c__[Saprospirae], o__[Saprospirales], f__Chitinophagaceae, g__Lacibacter	0.00726823
												{Unknown Order} At12OctB3	k__Bacteria, p__Bacteroidetes, c__At12OctB3, o__, f__, g__	0.00726823
												{Unknown Family} Cytophagales	k__Bacteria, p__Bacteroidetes, c__Cytophagia, o__Cytophagales, f__, g__	0.00726823
												Cytophaga	k__Bacteria, p__Bacteroidetes, c__Cytophagia, o__Cytophagales, f__Cytophagaceae, g__Cytophaga	0.00726823
												Chryseobacterium	k__Bacteria, p__Bacteroidetes, c__Flavobacteriia, o__Flavobacteriales, f__[Weeksellaceae], g__Chryseobacterium	0.00726823
												Candidatus Protochlamydia	k__Bacteria, p__Chlamydiae, c__Chlamydiia, o__Chlamydiales, f__Parachlamydiaceae, g__Candidatus Protochlamydia	0.00726823
												{Unknown Family} CFB-26	k__Bacteria, p__Chloroflexi, c__Anaerolineae, o__CFB-26, f__, g__	0.00726823
												{Unknown Family} envOPS12	k__Bacteria, p__Chloroflexi, c__Anaerolineae, o__envOPS12, f__, g__	0.00726823
												{Unknown Family} [Roseiflexales]	k__Bacteria, p__Chloroflexi, c__Chloroflexi, o__[Roseiflexales], f__, g__	0.00726823
												{Unknown Order} P2-11E	k__Bacteria, p__Chloroflexi, c__P2-11E, o__, f__, g__	0.00726823
												{Unknown Order} SHA-26	k__Bacteria, p__Chloroflexi, c__SHA-26, o__, f__, g__	0.00726823
												{Unknown Order} TK10	k__Bacteria, p__Chloroflexi, c__TK10, o__, f__, g__	0.00726823
												{Unknown Genus} 5B-12	k__Bacteria, p__Chloroflexi, c__TK10, o__AKYG885, f__5B-12, g__	0.00726823
												{Unknown Family} MLE1-12	k__Bacteria, p__Cyanobacteria, c__4C0d-2, o__MLE1-12, f__, g__	0.00726823
												{Unknown Family} Chlorophyta	k__Bacteria, p__Cyanobacteria, c__Chloroplast, o__Chlorophyta, f__, g__	0.00726823
												{Unknown Order} ML635J-21	k__Bacteria, p__Cyanobacteria, c__ML635J-21, o__, f__, g__	0.00726823
												{Unknown Family} Elusimicrobiales	k__Bacteria, p__Elusimicrobia, c__Elusimicrobia, o__Elusimicrobiales, f__, g__	0.00726823
												{Unknown Class} FCPU426	k__Bacteria, p__FCPU426, c__, o__, f__, g__	0.00726823
												{Unknown Genus} Bacillaceae	k__Bacteria, p__Firmicutes, c__Bacilli, o__Bacillales, f__Bacillaceae, g__	0.00726823
												Caloramator	k__Bacteria, p__Firmicutes, c__Clostridia, o__Clostridiales, f__Clostridiaceae, g__Caloramator	0.00726823
												Clostridium-1	k__Bacteria, p__Firmicutes, c__Clostridia, o__Clostridiales, f__Clostridiaceae, g__Clostridium	0.00726823
												{Unknown Genus} Ruminococcaceae	k__Bacteria, p__Firmicutes, c__Clostridia, o__Clostridiales, f__Ruminococcaceae, g__	0.00726823
												{Unknown Genus} A1-B1	k__Bacteria, p__Gemmatimonadetes, c__Gemmatimonadetes, o__Gemmatimonadales, f__A1-B1, g__	0.00726823
												Gemmatimonas	k__Bacteria, p__Gemmatimonadetes, c__Gemmatimonadetes, o__Gemmatimonadales, f__Gemmatimonadaceae, g__Gemmatimonas	0.00726823
												{Unknown Class} Kazan-3B-28	k__Bacteria, p__Kazan-3B-28, c__, o__, f__, g__	0.00726823
												{Unknown Genus} Arctic95B-10	k__Bacteria, p__Lentisphaerae, c__[Lentisphaeria], o__Lentisphaerales, f__Arctic95B-10, g__	0.00726823
												{Unknown Order} SM2F11	k__Bacteria, p__OD1, c__SM2F11, o__, f__, g__	0.00726823
												{Unknown Order} BD7-11	k__Bacteria, p__Planctomycetes, c__BD7-11, o__, f__, g__	0.00726823
												{Unknown Family} mle1-8	k__Bacteria, p__Planctomycetes, c__Phycisphaerae, o__mle1-8, f__, g__	0.00726823
												{Unknown Order} Pla3	k__Bacteria, p__Planctomycetes, c__Pla3, o__, f__, g__	0.00726823
												{Unknown Genus} Isosphaeraceae	k__Bacteria, p__Planctomycetes, c__Planctomycetia, o__Gemmatales, f__Isosphaeraceae, g__	0.00726823
												Asticcacaulis	k__Bacteria, p__Proteobacteria, c__Alphaproteobacteria, o__Caulobacterales, f__Caulobacteraceae, g__Asticcacaulis	0.00726823
												Mycoplana	k__Bacteria, p__Proteobacteria, c__Alphaproteobacteria, o__Caulobacterales, f__Caulobacteraceae, g__Mycoplana	0.00726823
												Pleomorphomonas	k__Bacteria, p__Proteobacteria, c__Alphaproteobacteria, o__Rhizobiales, f__Methylocystaceae, g__Pleomorphomonas	0.00726823
												{Unknown Genus} Xanthobacteraceae	k__Bacteria, p__Proteobacteria, c__Alphaproteobacteria, o__Rhizobiales, f__Xanthobacteraceae, g__	0.00726823
												Erythrobacter	k__Bacteria, p__Proteobacteria, c__Alphaproteobacteria, o__Sphingomonadales, f__Erythrobacteraceae, g__Erythrobacter	0.00726823
												Sphingobium	k__Bacteria, p__Proteobacteria, c__Alphaproteobacteria, o__Sphingomonadales, f__Sphingomonadaceae, g__Sphingobium	0.00726823
												{Unknown Family} Methylophilales	k__Bacteria, p__Proteobacteria, c__Betaproteobacteria, o__Methylophilales, f__, g__	0.00726823
												Nitrosomonas	k__Bacteria, p__Proteobacteria, c__Betaproteobacteria, o__Nitrosomonadales, f__Nitrosomonadaceae, g__Nitrosomonas	0.00726823
												{Unknown Family} SBla14	k__Bacteria, p__Proteobacteria, c__Betaproteobacteria, o__SBla14, f__, g__	0.00726823
												{Unknown Order} Deltaproteobacteria	k__Bacteria, p__Proteobacteria, c__Deltaproteobacteria, o__, f__, g__	0.00726823
												{Unknown Genus} [Entotheonellaceae]	k__Bacteria, p__Proteobacteria, c__Deltaproteobacteria, o__[Entotheonellales], f__[Entotheonellaceae], g__	0.00726823
												{Unknown Family} FAC87	k__Bacteria, p__Proteobacteria, c__Deltaproteobacteria, o__FAC87, f__, g__	0.00726823
												{Unknown Family} Spirobacillales	k__Bacteria, p__Proteobacteria, c__Deltaproteobacteria, o__Spirobacillales, f__, g__	0.00726823
												{Unknown Genus} 211ds20	k__Bacteria, p__Proteobacteria, c__Gammaproteobacteria, o__Alteromonadales, f__211ds20, g__	0.00726823
												{Unknown Genus} Alteromonadaceae	k__Bacteria, p__Proteobacteria, c__Gammaproteobacteria, o__Alteromonadales, f__Alteromonadaceae, g__	0.00726823
												{Unknown Genus} Enterobacteriaceae	k__Bacteria, p__Proteobacteria, c__Gammaproteobacteria, o__Enterobacteriales, f__Enterobacteriaceae, g__	0.00726823
												Plesiomonas	k__Bacteria, p__Proteobacteria, c__Gammaproteobacteria, o__Enterobacteriales, f__Enterobacteriaceae, g__Plesiomonas	0.00726823
												Serratia	k__Bacteria, p__Proteobacteria, c__Gammaproteobacteria, o__Enterobacteriales, f__Enterobacteriaceae, g__Serratia	0.00726823
												Tatlockia	k__Bacteria, p__Proteobacteria, c__Gammaproteobacteria, o__Legionellales, f__Legionellaceae, g__Tatlockia	0.00726823
												{Unknown Family} CV90	k__Bacteria, p__Proteobacteria, c__TA18, o__CV90, f__, g__	0.00726823
												{Unknown Order} Mollicutes	k__Bacteria, p__Tenericutes, c__Mollicutes, o__, f__, g__	0.00726823
												{Unknown Family} EW055	k__Bacteria, p__TM7, c__TM7-3, o__EW055, f__, g__	0.00726823
												{Unknown Family} S-BQ2-57	k__Bacteria, p__Verrucomicrobia, c__[Methylacidiphilae], o__S-BQ2-57, f__, g__	0.00726823
												Prosthecobacter	k__Bacteria, p__Verrucomicrobia, c__Verrucomicrobiae, o__Verrucomicrobiales, f__Verrucomicrobiaceae, g__Prosthecobacter	0.00726823
												{Unknown Genus} CV106	k__Bacteria, p__WS3, c__PRR-12, o__Sediment-1, f__CV106, g__	0.00726823
												Dyadobacter	k__Bacteria, p__Bacteroidetes, c__Cytophagia, o__Cytophagales, f__Cytophagaceae, g__Dyadobacter	0.00363412
												{Unknown Genus} Clostridiaceae	k__Bacteria, p__Firmicutes, c__Clostridia, o__Clostridiales, f__Clostridiaceae, g__	0.00363412
												Enhydrobacter	k__Bacteria, p__Proteobacteria, c__Gammaproteobacteria, o__Pseudomonadales, f__Moraxellaceae, g__Enhydrobacter	0.00363412

## Sheet: ITS Air
Air: Phylum				Air: Class				Air: Order				Air: Genus
Phylum (Aggregated)	Taxonomy	Abundance [%]		Class (Aggregated)	Taxonomy	Abundance [%]		Order (Aggregated)	Taxonomy	Abundance [%]		Genus (Aggregated)	Taxonomy	Abundance [%]
Ascomycota	Fungi; Ascomycota	81.5735		Dothideomycetes	Fungi; Ascomycota; Dothideomycetes	72.221		Capnodiales	Fungi; Ascomycota; Dothideomycetes; Capnodiales	61.3782		Mycosphaerella	Fungi; Ascomycota; Dothideomycetes; Capnodiales; Mycosphaerellaceae; Mycosphaerella	55.9663
Basidiomycota	Fungi; Basidiomycota	10.8013		N/A	N/A	7.2611		Pleosporales	Fungi; Ascomycota; Dothideomycetes; Pleosporales	10.1346		N/A	N/A	7.2611
N/A	N/A	7.2611		Leotiomycetes	Fungi; Ascomycota; Leotiomycetes	4.77184		N/A	N/A	7.2611		Cladosporium	Fungi; Ascomycota; Dothideomycetes; Capnodiales; Cladosporiaceae; Cladosporium	4.99407
Unidentified-1	Fungi; Unidentified	0.353758		Tremellomycetes	Fungi; Basidiomycota; Tremellomycetes	3.48056		Helotiales	Fungi; Ascomycota; Leotiomycetes; Helotiales	3.25379		Chalastospora	Fungi; Ascomycota; Dothideomycetes; Pleosporales; Pleosporales_fam_Incertae_sedis; Chalastospora	4.88458
Unidentified-2	Unidentified; Unidentified	0.00583117		Sordariomycetes	Fungi; Ascomycota; Sordariomycetes	3.46177		Sporidiobolales	Fungi; Basidiomycota; Microbotryomycetes; Sporidiobolales	1.90031		Sporobolomyces	Fungi; Basidiomycota; Microbotryomycetes; Sporidiobolales; Sporidiobolaceae; Sporobolomyces	1.89578
Mortierellomycota	Fungi; Mortierellomycota	0.00323954		Agaricomycetes	Fungi; Basidiomycota; Agaricomycetes	3.20066		Tremellales	Fungi; Basidiomycota; Tremellomycetes; Tremellales	1.65476		Alternaria	Fungi; Ascomycota; Dothideomycetes; Pleosporales; Pleosporaceae; Alternaria	1.7947
{Unknown Phylum} Fungi	Fungi;	0.00129582		Microbotryomycetes	Fungi; Basidiomycota; Microbotryomycetes	1.91651		Myrmecridiales	Fungi; Ascomycota; Sordariomycetes; Myrmecridiales	1.5958		Myrmecridium	Fungi; Ascomycota; Sordariomycetes; Myrmecridiales; Myrmecridiaceae; Myrmecridium	1.5958
				Malasseziomycetes	Fungi; Basidiomycota; Malasseziomycetes	1.08395		Erysiphales	Fungi; Ascomycota; Leotiomycetes; Erysiphales	1.49537		Botrytis	Fungi; Ascomycota; Leotiomycetes; Helotiales; Sclerotiniaceae; Botrytis	1.57053
				Ustilaginomycetes	Fungi; Basidiomycota; Ustilaginomycetes	0.721121		Cystofilobasidiales	Fungi; Basidiomycota; Tremellomycetes; Cystofilobasidiales	1.2226		Neoascochyta	Fungi; Ascomycota; Dothideomycetes; Pleosporales; Didymellaceae; Neoascochyta	1.31201
				Unidentified-1	Fungi; Ascomycota; Unidentified	0.482691		Polyporales	Fungi; Basidiomycota; Agaricomycetes; Polyporales	1.19021		Malassezia	Fungi; Basidiomycota; Malasseziomycetes; Malasseziales; Malasseziaceae; Malassezia	1.07423
				Eurotiomycetes	Fungi; Ascomycota; Eurotiomycetes	0.401703		Agaricales	Fungi; Basidiomycota; Agaricomycetes; Agaricales	1.15198		Erysiphe	Fungi; Ascomycota; Leotiomycetes; Erysiphales; Erysiphaceae; Erysiphe	1.05479
				Unidentified-3	Fungi; Unidentified; Unidentified	0.353758		Malasseziales	Fungi; Basidiomycota; Malasseziomycetes; Malasseziales	1.08395		Vishniacozyma	Fungi; Basidiomycota; Tremellomycetes; Tremellales; Bulleribasidiaceae; Vishniacozyma	0.936226
				Cystobasidiomycetes	Fungi; Basidiomycota; Cystobasidiomycetes	0.201499		Hypocreales	Fungi; Ascomycota; Sordariomycetes; Hypocreales	0.919381		Lachnum	Fungi; Ascomycota; Leotiomycetes; Helotiales; Hyaloscyphaceae; Lachnum	0.932987
				Taphrinomycetes	Fungi; Ascomycota; Taphrinomycetes	0.108201		Ustilaginales	Fungi; Basidiomycota; Ustilaginomycetes; Ustilaginales	0.709459		Udeniomyces	Fungi; Basidiomycota; Tremellomycetes; Cystofilobasidiales; Mrakiaceae; Udeniomyces	0.902535
				Agaricostilbomycetes	Fungi; Basidiomycota; Agaricostilbomycetes	0.0822843		Unidentified-04	Fungi; Ascomycota; Sordariomycetes; Unidentified	0.608385		Periconia	Fungi; Ascomycota; Dothideomycetes; Pleosporales; Periconiaceae; Periconia	0.787856
				Ascomycota_cls_Incertae_sedis	Fungi; Ascomycota; Ascomycota_cls_Incertae_sedis	0.0783968		Filobasidiales	Fungi; Basidiomycota; Tremellomycetes; Filobasidiales	0.572102		Ustilago	Fungi; Basidiomycota; Ustilaginomycetes; Ustilaginales; Ustilaginaceae; Ustilago	0.65957
				Unidentified-2	Fungi; Basidiomycota; Unidentified	0.0479452		Unidentified-05	Fungi; Ascomycota; Unidentified; Unidentified	0.482691		Unidentified-30	Fungi; Ascomycota; Sordariomycetes; Unidentified; Unidentified; Unidentified	0.608385
				Exobasidiomycetes	Fungi; Basidiomycota; Exobasidiomycetes	0.0388745		Unidentified-09	Fungi; Unidentified; Unidentified; Unidentified	0.353758		Unidentified-11	Fungi; Ascomycota; Dothideomycetes; Pleosporales; Unidentified; Unidentified	0.596075
				Pucciniomycetes	Fungi; Basidiomycota; Pucciniomycetes	0.020733		Eurotiales	Fungi; Ascomycota; Eurotiomycetes; Eurotiales	0.344039		Unidentified-20	Fungi; Ascomycota; Leotiomycetes; Helotiales; Unidentified; Unidentified	0.592835
				Orbiliomycetes	Fungi; Ascomycota; Orbiliomycetes	0.014254		Dothideales	Fungi; Ascomycota; Dothideomycetes; Dothideales	0.339504		Filobasidium	Fungi; Basidiomycota; Tremellomycetes; Filobasidiales; Filobasidiaceae; Filobasidium	0.566271
				Pezizomycetes	Fungi; Ascomycota; Pezizomycetes	0.014254		Xylariales	Fungi; Ascomycota; Sordariomycetes; Xylariales	0.261107		Unidentified-45	Fungi; Basidiomycota; Agaricomycetes; Polyporales; Unidentified; Unidentified	0.549426
				Arthoniomycetes	Fungi; Ascomycota; Arthoniomycetes	0.00907071		Russulales	Fungi; Basidiomycota; Agaricomycetes; Russulales	0.23843		Unidentified-32	Fungi; Ascomycota; Unidentified; Unidentified; Unidentified; Unidentified	0.482691
				Lecanoromycetes	Fungi; Ascomycota; Lecanoromycetes	0.00712698		Unidentified-01	Fungi; Ascomycota; Dothideomycetes; Unidentified	0.20733		Dioszegia	Fungi; Basidiomycota; Tremellomycetes; Tremellales; Bulleribasidiaceae; Dioszegia	0.368659
				Wallemiomycetes	Fungi; Basidiomycota; Wallemiomycetes	0.00712698		Cystobasidiomycetes_ord_Incertae_sedis	Fungi; Basidiomycota; Cystobasidiomycetes; Cystobasidiomycetes_ord_Incertae_sedis	0.152258		Unidentified-60	Fungi; Unidentified; Unidentified; Unidentified; Unidentified; Unidentified	0.353758
				Unidentified-4	Unidentified; Unidentified; Unidentified	0.00583117		Thelephorales	Fungi; Basidiomycota; Agaricomycetes; Thelephorales	0.148371		Blumeria	Fungi; Ascomycota; Leotiomycetes; Erysiphales; Erysiphaceae; Blumeria	0.333672
				Saccharomycetes	Fungi; Ascomycota; Saccharomycetes	0.00323954		Trechisporales	Fungi; Basidiomycota; Agaricomycetes; Trechisporales	0.135413		Unidentified-35	Fungi; Basidiomycota; Agaricomycetes; Agaricales; Unidentified; Unidentified	0.324602
				Mortierellomycetes	Fungi; Mortierellomycota; Mortierellomycetes	0.00323954		Venturiales	Fungi; Ascomycota; Dothideomycetes; Venturiales	0.128286		Acremonium	Fungi; Ascomycota; Sordariomycetes; Hypocreales; Hypocreales_fam_Incertae_sedis; Acremonium	0.32201
				{Unknown Phylum} Fungi	Fungi; ;	0.00129582		Taphrinales	Fungi; Ascomycota; Taphrinomycetes; Taphrinales	0.108201		Aureobasidium	Fungi; Ascomycota; Dothideomycetes; Dothideales; Aureobasidiaceae; Aureobasidium	0.319418
								Agaricostilbales	Fungi; Basidiomycota; Agaricostilbomycetes; Agaricostilbales	0.0809884		Unidentified-27	Fungi; Ascomycota; Sordariomycetes; Hypocreales; Nectriaceae; Unidentified	0.250092
								Ascomycota_ord_Incertae_sedis	Fungi; Ascomycota; Ascomycota_cls_Incertae_sedis; Ascomycota_ord_Incertae_sedis	0.0783968		Itersonilia	Fungi; Basidiomycota; Tremellomycetes; Cystofilobasidiales; Mrakiaceae; Itersonilia	0.250092
								Cantharellales	Fungi; Basidiomycota; Agaricomycetes; Cantharellales	0.0712698		Penicillium	Fungi; Ascomycota; Eurotiomycetes; Eurotiales; Aspergillaceae; Penicillium	0.219641
								Corticiales	Fungi; Basidiomycota; Agaricomycetes; Corticiales	0.0680303		Unidentified-12	Fungi; Ascomycota; Dothideomycetes; Unidentified; Unidentified; Unidentified	0.20733
								Unidentified-06	Fungi; Basidiomycota; Agaricomycetes; Unidentified	0.062847		Psilocybe	Fungi; Basidiomycota; Agaricomycetes; Agaricales; Strophariaceae; Psilocybe	0.204739
								Chaetothyriales	Fungi; Ascomycota; Eurotiomycetes; Chaetothyriales	0.0550721		Arthrinium	Fungi; Ascomycota; Sordariomycetes; Xylariales; Apiosporaceae; Arthrinium	0.19826
								Unidentified-08	Fungi; Basidiomycota; Unidentified; Unidentified	0.0479452		Pyrenophora	Fungi; Ascomycota; Dothideomycetes; Pleosporales; Pleosporaceae; Pyrenophora	0.192429
								Erythrobasidiales	Fungi; Basidiomycota; Cystobasidiomycetes; Erythrobasidiales	0.0472973		Bullera	Fungi; Basidiomycota; Tremellomycetes; Tremellales; Bulleraceae; Bullera	0.161977
								Entylomatales	Fungi; Basidiomycota; Exobasidiomycetes; Entylomatales	0.0336912		Aspergillus	Fungi; Ascomycota; Eurotiomycetes; Eurotiales; Aspergillaceae; Aspergillus	0.122455
								Auriculariales	Fungi; Basidiomycota; Agaricomycetes; Auriculariales	0.0330433		Unidentified-13	Fungi; Ascomycota; Dothideomycetes; Venturiales; Unidentified; Unidentified	0.116623
								Gloeophyllales	Fungi; Basidiomycota; Agaricomycetes; Gloeophyllales	0.02786		Unidentified-09	Fungi; Ascomycota; Dothideomycetes; Pleosporales; Phaeosphaeriaceae; Unidentified	0.11468
								Agaricomycetes_ord_Incertae_sedis	Fungi; Basidiomycota; Agaricomycetes; Agaricomycetes_ord_Incertae_sedis	0.0272121		Taphrina	Fungi; Ascomycota; Taphrinomycetes; Taphrinales; Taphrinaceae; Taphrina	0.108201
								Dothideomycetes_ord_Incertae_sedis	Fungi; Ascomycota; Dothideomycetes; Dothideomycetes_ord_Incertae_sedis	0.0265642		Ramularia	Fungi; Ascomycota; Dothideomycetes; Capnodiales; Mycosphaerellaceae; Ramularia	0.107553
								Hymenochaetales	Fungi; Basidiomycota; Agaricomycetes; Hymenochaetales	0.0265642		Sarocladium	Fungi; Ascomycota; Sordariomycetes; Hypocreales; Hypocreales_fam_Incertae_sedis; Sarocladium	0.105609
								Glomerellales	Fungi; Ascomycota; Sordariomycetes; Glomerellales	0.0252684		Unidentified-50	Fungi; Basidiomycota; Agaricomycetes; Trechisporales; Unidentified; Unidentified	0.100426
								Sordariales	Fungi; Ascomycota; Sordariomycetes; Sordariales	0.0252684		Extremus	Fungi; Ascomycota; Dothideomycetes; Capnodiales; Extremaceae; Extremus	0.0991299
								Leotiomycetes_ord_Incertae_sedis	Fungi; Ascomycota; Leotiomycetes; Leotiomycetes_ord_Incertae_sedis	0.021381		Psathyrella	Fungi; Basidiomycota; Agaricomycetes; Agaricales; Psathyrellaceae; Psathyrella	0.098482
								Holtermanniales	Fungi; Basidiomycota; Tremellomycetes; Holtermanniales	0.0161977		Coprinopsis	Fungi; Basidiomycota; Agaricomycetes; Agaricales; Psathyrellaceae; Coprinopsis	0.0952424
								Platygloeales	Fungi; Basidiomycota; Pucciniomycetes; Platygloeales	0.0155498		Tomentella	Fungi; Basidiomycota; Agaricomycetes; Thelephorales; Thelephoraceae; Tomentella	0.0932987
								Trichosporonales	Fungi; Basidiomycota; Tremellomycetes; Trichosporonales	0.0149019		Unidentified-26	Fungi; Ascomycota; Sordariomycetes; Hypocreales; Hypocreaceae; Unidentified	0.091355
								Orbiliales	Fungi; Ascomycota; Orbiliomycetes; Orbiliales	0.014254		Unidentified-29	Fungi; Ascomycota; Sordariomycetes; Hypocreales; Unidentified; Unidentified	0.084228
								Pezizales	Fungi; Ascomycota; Pezizomycetes; Pezizales	0.014254		Unidentified-48	Fungi; Basidiomycota; Agaricomycetes; Russulales; Unidentified; Unidentified	0.0790447
								Microbotryales	Fungi; Basidiomycota; Microbotryomycetes; Microbotryales	0.014254		Byssomerulius	Fungi; Basidiomycota; Agaricomycetes; Polyporales; Irpicaceae; Byssomerulius	0.0783968
								Urocystidales	Fungi; Basidiomycota; Ustilaginomycetes; Urocystidales	0.0116623		Symmetrospora	Fungi; Basidiomycota; Cystobasidiomycetes; Cystobasidiomycetes_ord_Incertae_sedis; Cystobasidiomycetes_fam_Incertae_sedis; Symmetrospora	0.0783968
								Trichosphaeriales	Fungi; Ascomycota; Sordariomycetes; Trichosphaeriales	0.00907071		Phanerochaete	Fungi; Basidiomycota; Agaricomycetes; Polyporales; Phanerochaetaceae; Phanerochaete	0.0751573
								Microascales	Fungi; Ascomycota; Sordariomycetes; Microascales	0.0084228		Buckleyzyma	Fungi; Basidiomycota; Cystobasidiomycetes; Cystobasidiomycetes_ord_Incertae_sedis; Cystobasidiomycetes_fam_Incertae_sedis; Buckleyzyma	0.0738615
								Lichenostigmatales	Fungi; Ascomycota; Arthoniomycetes; Lichenostigmatales	0.00777489		Unidentified-10	Fungi; Ascomycota; Dothideomycetes; Pleosporales; Pleosporaceae; Unidentified	0.0686782
								Wallemiales	Fungi; Basidiomycota; Wallemiomycetes; Wallemiales	0.00712698		Unidentified-46	Fungi; Basidiomycota; Agaricomycetes; Russulales; Peniophoraceae; Unidentified	0.0686782
								Boletales	Fungi; Basidiomycota; Agaricomycetes; Boletales	0.00647908		Agrocybe	Fungi; Basidiomycota; Agaricomycetes; Agaricales; Bolbitiaceae; Agrocybe	0.0660866
								Atheliales	Fungi; Basidiomycota; Agaricomycetes; Atheliales	0.00583117		Coprinellus	Fungi; Basidiomycota; Agaricomycetes; Agaricales; Psathyrellaceae; Coprinellus	0.0654387
								Tremellodendropsidales	Fungi; Basidiomycota; Agaricomycetes; Tremellodendropsidales	0.00583117		Dendryphion	Fungi; Ascomycota; Dothideomycetes; Pleosporales; Torulaceae; Dendryphion	0.0647908
								Unidentified-10	Unidentified; Unidentified; Unidentified; Unidentified	0.00583117		Unidentified-52	Fungi; Basidiomycota; Agaricomycetes; Unidentified; Unidentified; Unidentified	0.062847
								Tilletiales	Fungi; Basidiomycota; Exobasidiomycetes; Tilletiales	0.00518326		Radulidium	Fungi; Ascomycota; Ascomycota_cls_Incertae_sedis; Ascomycota_ord_Incertae_sedis; Ascomycota_fam_Incertae_sedis; Radulidium	0.0621991
								Tubeufiales	Fungi; Ascomycota; Dothideomycetes; Tubeufiales	0.00388745		Ceriporia	Fungi; Basidiomycota; Agaricomycetes; Polyporales; Irpicaceae; Ceriporia	0.0621991
								Pucciniales	Fungi; Basidiomycota; Pucciniomycetes; Pucciniales	0.00388745		Sclerostagonospora	Fungi; Ascomycota; Dothideomycetes; Pleosporales; Phaeosphaeriaceae; Sclerostagonospora	0.0615512
								Teloschistales	Fungi; Ascomycota; Lecanoromycetes; Teloschistales	0.00323954		Auriscalpium	Fungi; Basidiomycota; Agaricomycetes; Russulales; Auriscalpiaceae; Auriscalpium	0.0615512
								Saccharomycetales	Fungi; Ascomycota; Saccharomycetes; Saccharomycetales	0.00323954		Stagonospora	Fungi; Ascomycota; Dothideomycetes; Pleosporales; Massarinaceae; Stagonospora	0.0602554
								Mortierellales	Fungi; Mortierellomycota; Mortierellomycetes; Mortierellales	0.00323954		Papiliotrema	Fungi; Basidiomycota; Tremellomycetes; Tremellales; Rhynchogastremataceae; Papiliotrema	0.0570159
								Trapeliales	Fungi; Ascomycota; Lecanoromycetes; Trapeliales	0.00259163		Encoelia	Fungi; Ascomycota; Leotiomycetes; Helotiales; Sclerotiniaceae; Encoelia	0.0557201
								Chaetosphaeriales	Fungi; Ascomycota; Sordariomycetes; Chaetosphaeriales	0.00259163		Neoerysiphe	Fungi; Ascomycota; Leotiomycetes; Erysiphales; Erysiphaceae; Neoerysiphe	0.0544242
								Diaporthales	Fungi; Ascomycota; Sordariomycetes; Diaporthales	0.00194372		Podosphaera	Fungi; Ascomycota; Leotiomycetes; Erysiphales; Erysiphaceae; Podosphaera	0.0498889
								Togniniales	Fungi; Ascomycota; Sordariomycetes; Togniniales	0.00194372		Gibberella	Fungi; Ascomycota; Sordariomycetes; Hypocreales; Nectriaceae; Gibberella	0.049241
								Cystobasidiales	Fungi; Basidiomycota; Cystobasidiomycetes; Cystobasidiales	0.00194372		Unidentified-49	Fungi; Basidiomycota; Agaricomycetes; Thelephorales; Thelephoraceae; Unidentified	0.049241
								Leucosporidiales	Fungi; Basidiomycota; Microbotryomycetes; Leucosporidiales	0.00194372		Fomes	Fungi; Basidiomycota; Agaricomycetes; Polyporales; Coriolaceae; Fomes	0.0485931
								{Unknown Phylum} Fungi	Fungi; ; ;	0.00129582		Unidentified-58	Fungi; Basidiomycota; Unidentified; Unidentified; Unidentified; Unidentified	0.0479452
								Arthoniales	Fungi; Ascomycota; Arthoniomycetes; Arthoniales	0.00129582		Cystofilobasidium	Fungi; Basidiomycota; Tremellomycetes; Cystofilobasidiales; Cystofilobasidiaceae; Cystofilobasidium	0.0460014
								Botryosphaeriales	Fungi; Ascomycota; Dothideomycetes; Botryosphaeriales	0.00129582		Unidentified-05	Fungi; Ascomycota; Dothideomycetes; Capnodiales; Unidentified; Unidentified	0.0453535
								Myriangiales	Fungi; Ascomycota; Dothideomycetes; Myriangiales	0.00129582		Torula	Fungi; Ascomycota; Dothideomycetes; Pleosporales; Torulaceae; Torula	0.0427619
								Onygenales	Fungi; Ascomycota; Eurotiomycetes; Onygenales	0.00129582		Fomitopsis	Fungi; Basidiomycota; Agaricomycetes; Polyporales; Fomitopsidaceae; Fomitopsis	0.0427619
								Unidentified-02	Fungi; Ascomycota; Eurotiomycetes; Unidentified	0.00129582		Incrucipulum	Fungi; Ascomycota; Leotiomycetes; Helotiales; Hyaloscyphaceae; Incrucipulum	0.042114
								Lecanorales	Fungi; Ascomycota; Lecanoromycetes; Lecanorales	0.00129582		Agaricus	Fungi; Basidiomycota; Agaricomycetes; Agaricales; Agaricaceae; Agaricus	0.042114
								Unidentified-03	Fungi; Ascomycota; Leotiomycetes; Unidentified	0.00129582		Kondoa	Fungi; Basidiomycota; Agaricostilbomycetes; Agaricostilbales; Kondoaceae; Kondoa	0.0408182
								Coniochaetales	Fungi; Ascomycota; Sordariomycetes; Coniochaetales	0.00129582		Erythrobasidium	Fungi; Basidiomycota; Cystobasidiomycetes; Erythrobasidiales; Erythrobasidiaceae; Erythrobasidium	0.0408182
								Sordariomycetes_ord_Incertae_sedis	Fungi; Ascomycota; Sordariomycetes; Sordariomycetes_ord_Incertae_sedis	0.00129582		Unidentified-39	Fungi; Basidiomycota; Agaricomycetes; Cantharellales; Unidentified; Unidentified	0.0382265
								Amylocorticiales	Fungi; Basidiomycota; Agaricomycetes; Amylocorticiales	0.00129582		Bjerkandera	Fungi; Basidiomycota; Agaricomycetes; Polyporales; Phanerochaetaceae; Bjerkandera	0.0369307
								Unidentified-07	Fungi; Basidiomycota; Agaricostilbomycetes; Unidentified	0.00129582		Cryptococcus	Fungi; Basidiomycota; Tremellomycetes; Tremellales; Tremellaceae; Cryptococcus	0.0369307
								Septobasidiales	Fungi; Basidiomycota; Pucciniomycetes; Septobasidiales	0.00129582		Ceraceomyces	Fungi; Basidiomycota; Agaricomycetes; Polyporales; Meruliaceae; Ceraceomyces	0.0362828
												Genolevuria	Fungi; Basidiomycota; Tremellomycetes; Tremellales; Bulleraceae; Genolevuria	0.0356349
												Stropharia	Fungi; Basidiomycota; Agaricomycetes; Agaricales; Strophariaceae; Stropharia	0.0343391
												Funalia	Fungi; Basidiomycota; Agaricomycetes; Polyporales; Polyporaceae; Funalia	0.0343391
												Unidentified-54	Fungi; Basidiomycota; Exobasidiomycetes; Entylomatales; Unidentified; Unidentified	0.0323954
												Trechispora	Fungi; Basidiomycota; Agaricomycetes; Trechisporales; Hydnodontaceae; Trechispora	0.0310996
												Exophiala	Fungi; Ascomycota; Eurotiomycetes; Chaetothyriales; Herpotrichiellaceae; Exophiala	0.0304517
												Unidentified-31	Fungi; Ascomycota; Sordariomycetes; Xylariales; Unidentified; Unidentified	0.0291558
												Didymella	Fungi; Ascomycota; Dothideomycetes; Pleosporales; Didymellaceae; Didymella	0.02786
												Oxyporus	Fungi; Basidiomycota; Agaricomycetes; Agaricomycetes_ord_Incertae_sedis; Agaricomycetes_fam_Incertae_sedis; Oxyporus	0.0272121
												Mycena	Fungi; Basidiomycota; Agaricomycetes; Agaricales; Tricholomataceae; Mycena	0.0265642
												Steccherinum	Fungi; Basidiomycota; Agaricomycetes; Polyporales; Polyporales_fam_Incertae_sedis; Steccherinum	0.0265642
												Gloeophyllum	Fungi; Basidiomycota; Agaricomycetes; Gloeophyllales; Gloeophyllaceae; Gloeophyllum	0.0252684
												Gymnopus	Fungi; Basidiomycota; Agaricomycetes; Agaricales; Omphalotaceae; Gymnopus	0.0246205
												Unidentified-57	Fungi; Basidiomycota; Tremellomycetes; Tremellales; Unidentified; Unidentified	0.0246205
												Neocatenulostroma	Fungi; Ascomycota; Dothideomycetes; Capnodiales; Teratosphaeriaceae; Neocatenulostroma	0.0239726
												Mrakiella	Fungi; Basidiomycota; Tremellomycetes; Cystofilobasidiales; Cystofilobasidiales_fam_Incertae_sedis; Mrakiella	0.0239726
												Stemphylium	Fungi; Ascomycota; Dothideomycetes; Pleosporales; Pleosporaceae; Stemphylium	0.0233247
												Kalmanozyma	Fungi; Basidiomycota; Ustilaginomycetes; Ustilaginales; Ustilaginaceae; Kalmanozyma	0.0233247
												Unidentified-22	Fungi; Ascomycota; Leotiomycetes; Leotiomycetes_ord_Incertae_sedis; Pseudeurotiaceae; Unidentified	0.021381
												Parasola	Fungi; Basidiomycota; Agaricomycetes; Agaricales; Psathyrellaceae; Parasola	0.021381
												Antrodiella	Fungi; Basidiomycota; Agaricomycetes; Polyporales; Coriolaceae; Antrodiella	0.021381
												Pleurophoma	Fungi; Ascomycota; Dothideomycetes; Pleosporales; Lentitheciaceae; Pleurophoma	0.020733
												Conocybe	Fungi; Basidiomycota; Agaricomycetes; Agaricales; Bolbitiaceae; Conocybe	0.020733
												Setoseptoria	Fungi; Ascomycota; Dothideomycetes; Pleosporales; Lentitheciaceae; Setoseptoria	0.0200851
												Sphaerulina	Fungi; Ascomycota; Dothideomycetes; Capnodiales; Mycosphaerellaceae; Sphaerulina	0.0194372
												Neurospora	Fungi; Ascomycota; Sordariomycetes; Sordariales; Sordariaceae; Neurospora	0.0194372
												Kurtzmanomyces	Fungi; Basidiomycota; Agaricostilbomycetes; Agaricostilbales; Chionosphaeraceae; Kurtzmanomyces	0.0187893
												Leptospora	Fungi; Ascomycota; Dothideomycetes; Dothideomycetes_ord_Incertae_sedis; Dothideomycetes_fam_Incertae_sedis; Leptospora	0.0181414
												Phlebiella	Fungi; Basidiomycota; Agaricomycetes; Corticiales; Corticiaceae; Phlebiella	0.0181414
												Panaeolus	Fungi; Basidiomycota; Agaricomycetes; Agaricales; Bolbitiaceae; Panaeolus	0.0174935
												Unidentified-03	Fungi; Ascomycota; Dothideomycetes; Capnodiales; Mycosphaerellaceae; Unidentified	0.0168456
												Clitopilus	Fungi; Basidiomycota; Agaricomycetes; Agaricales; Entolomataceae; Clitopilus	0.0168456
												Lentinus	Fungi; Basidiomycota; Agaricomycetes; Polyporales; Lentinaceae; Lentinus	0.0168456
												Unidentified-43	Fungi; Basidiomycota; Agaricomycetes; Polyporales; Phanerochaetaceae; Unidentified	0.0168456
												Aurantiporus	Fungi; Basidiomycota; Agaricomycetes; Polyporales; Coriolaceae; Aurantiporus	0.0161977
												Holtermanniella	Fungi; Basidiomycota; Tremellomycetes; Holtermanniales; Holtermanniales_fam_Incertae_sedis; Holtermanniella	0.0161977
												Unidentified-59	Fungi; Basidiomycota; Ustilaginomycetes; Ustilaginales; Ustilaginaceae; Unidentified	0.0161977
												Phaeothecoidea	Fungi; Ascomycota; Dothideomycetes; Capnodiales; Teratosphaeriaceae; Phaeothecoidea	0.0155498
												Marasmius	Fungi; Basidiomycota; Agaricomycetes; Agaricales; Marasmiaceae; Marasmius	0.0155498
												Eocronartium	Fungi; Basidiomycota; Pucciniomycetes; Platygloeales; Eocronartiaceae; Eocronartium	0.0155498
												Volucrispora	Fungi; Ascomycota; Ascomycota_cls_Incertae_sedis; Ascomycota_ord_Incertae_sedis; Ascomycota_fam_Incertae_sedis; Volucrispora	0.0149019
												Unidentified-38	Fungi; Basidiomycota; Agaricomycetes; Cantharellales; Ceratobasidiaceae; Unidentified	0.0149019
												Unidentified-40	Fungi; Basidiomycota; Agaricomycetes; Corticiales; Corticiaceae; Unidentified	0.0149019
												Ganoderma	Fungi; Basidiomycota; Agaricomycetes; Polyporales; Ganodermataceae; Ganoderma	0.0149019
												Trichosporon	Fungi; Basidiomycota; Tremellomycetes; Trichosporonales; Trichosporonaceae; Trichosporon	0.0149019
												Arthrocatena	Fungi; Ascomycota; Dothideomycetes; Capnodiales; Capnodiales_fam_Incertae_sedis; Arthrocatena	0.014254
												Bensingtonia	Fungi; Basidiomycota; Agaricostilbomycetes; Agaricostilbales; Kondoaceae; Bensingtonia	0.014254
												Microbotryum	Fungi; Basidiomycota; Microbotryomycetes; Microbotryales; Microbotryaceae; Microbotryum	0.014254
												Devriesia	Fungi; Ascomycota; Dothideomycetes; Capnodiales; Teratosphaeriaceae; Devriesia	0.0136061
												Hormonema	Fungi; Ascomycota; Dothideomycetes; Dothideales; Dothioraceae; Hormonema	0.0136061
												Colletotrichum	Fungi; Ascomycota; Sordariomycetes; Glomerellales; Glomerellaceae; Colletotrichum	0.0136061
												Peniophorella	Fungi; Basidiomycota; Agaricomycetes; Hymenochaetales; Hymenochaetales_fam_Incertae_sedis; Peniophorella	0.0136061
												Hannaella	Fungi; Basidiomycota; Tremellomycetes; Tremellales; Bulleribasidiaceae; Hannaella	0.0136061
												Zymoseptoria	Fungi; Ascomycota; Dothideomycetes; Capnodiales; Mycosphaerellaceae; Zymoseptoria	0.0129582
												Unidentified-16	Fungi; Ascomycota; Eurotiomycetes; Chaetothyriales; Unidentified; Unidentified	0.0129582
												Pluteus	Fungi; Basidiomycota; Agaricomycetes; Agaricales; Pluteaceae; Pluteus	0.0123102
												Phlebia	Fungi; Basidiomycota; Agaricomycetes; Corticiales; Corticiaceae; Phlebia	0.0123102
												Unidentified-02	Fungi; Ascomycota; Dothideomycetes; Capnodiales; Cladosporiaceae; Unidentified	0.0116623
												Urocystis	Fungi; Basidiomycota; Ustilaginomycetes; Urocystidales; Urocystidaceae; Urocystis	0.0116623
												Neosetophoma	Fungi; Ascomycota; Dothideomycetes; Pleosporales; Phaeosphaeriaceae; Neosetophoma	0.0110144
												Calloria	Fungi; Ascomycota; Leotiomycetes; Helotiales; Dermateaceae; Calloria	0.0110144
												Dactylaria	Fungi; Ascomycota; Orbiliomycetes; Orbiliales; Orbiliaceae; Dactylaria	0.0110144
												Hapalopilus	Fungi; Basidiomycota; Agaricomycetes; Polyporales; Phanerochaetaceae; Hapalopilus	0.0110144
												Phlebiopsis	Fungi; Basidiomycota; Agaricomycetes; Polyporales; Phanerochaetaceae; Phlebiopsis	0.0110144
												Plectosphaerella	Fungi; Ascomycota; Sordariomycetes; Glomerellales; Plectosphaerellaceae; Plectosphaerella	0.0103665
												Unidentified-36	Fungi; Basidiomycota; Agaricomycetes; Auriculariales; Exidiaceae; Unidentified	0.0103665
												Datronia	Fungi; Basidiomycota; Agaricomycetes; Polyporales; Coriolaceae; Datronia	0.0103665
												Hyphoderma	Fungi; Basidiomycota; Agaricomycetes; Polyporales; Hyphodermataceae; Hyphoderma	0.0103665
												Scytinostroma	Fungi; Basidiomycota; Agaricomycetes; Russulales; Lachnocladiaceae; Scytinostroma	0.0103665
												Unidentified-14	Fungi; Ascomycota; Dothideomycetes; Venturiales; Venturiaceae; Unidentified	0.00971861
												Monographella	Fungi; Ascomycota; Sordariomycetes; Xylariales; Hyponectriaceae; Monographella	0.00971861
												Hypholoma	Fungi; Basidiomycota; Agaricomycetes; Agaricales; Strophariaceae; Hypholoma	0.00971861
												Unidentified-34	Fungi; Basidiomycota; Agaricomycetes; Agaricales; Strophariaceae; Unidentified	0.00971861
												Trametes	Fungi; Basidiomycota; Agaricomycetes; Polyporales; Coriolaceae; Trametes	0.00971861
												Unidentified-55	Fungi; Basidiomycota; Malasseziomycetes; Malasseziales; Unidentified; Unidentified	0.00971861
												Capnobotryella	Fungi; Ascomycota; Dothideomycetes; Capnodiales; Teratosphaeriaceae; Capnobotryella	0.00907071
												Angustimassarina	Fungi; Ascomycota; Dothideomycetes; Pleosporales; Amorosiaceae; Angustimassarina	0.00907071
												Nigrospora	Fungi; Ascomycota; Sordariomycetes; Trichosphaeriales; Trichosphaeriaceae; Nigrospora	0.00907071
												Unidentified-33	Fungi; Basidiomycota; Agaricomycetes; Agaricales; Psathyrellaceae; Unidentified	0.00907071
												Stereum	Fungi; Basidiomycota; Agaricomycetes; Russulales; Stereaceae; Stereum	0.00907071
												Antrodia	Fungi; Basidiomycota; Agaricomycetes; Polyporales; Fomitopsidaceae; Antrodia	0.0084228
												Dichomitus	Fungi; Basidiomycota; Agaricomycetes; Polyporales; Polyporaceae; Dichomitus	0.0084228
												Phaeococcomyces	Fungi; Ascomycota; Arthoniomycetes; Lichenostigmatales; Phaeococcomycetaceae; Phaeococcomyces	0.00777489
												Unidentified-04	Fungi; Ascomycota; Dothideomycetes; Capnodiales; Teratosphaeriaceae; Unidentified	0.00777489
												Keissleriella	Fungi; Ascomycota; Dothideomycetes; Pleosporales; Lentitheciaceae; Keissleriella	0.00777489
												Truncatella	Fungi; Ascomycota; Sordariomycetes; Xylariales; Bartaliniaceae; Truncatella	0.00777489
												Exidia	Fungi; Basidiomycota; Agaricomycetes; Auriculariales; Exidiaceae; Exidia	0.00777489
												Anthracocystis	Fungi; Basidiomycota; Ustilaginomycetes; Ustilaginales; Ustilaginaceae; Anthracocystis	0.00777489
												Neodevriesia	Fungi; Ascomycota; Dothideomycetes; Capnodiales; Neodevriesiaceae; Neodevriesia	0.00712698
												Articulospora	Fungi; Ascomycota; Leotiomycetes; Helotiales; Helotiaceae; Articulospora	0.00712698
												Trichopeziza	Fungi; Ascomycota; Leotiomycetes; Helotiales; Hyaloscyphaceae; Trichopeziza	0.00712698
												Microascus	Fungi; Ascomycota; Sordariomycetes; Microascales; Microascaceae; Microascus	0.00712698
												Hyphodontia	Fungi; Basidiomycota; Agaricomycetes; Corticiales; Corticiaceae; Hyphodontia	0.00712698
												Chionosphaera	Fungi; Basidiomycota; Agaricostilbomycetes; Agaricostilbales; Chionosphaeraceae; Chionosphaera	0.00712698
												Wallemia	Fungi; Basidiomycota; Wallemiomycetes; Wallemiales; Wallemiales_fam_Incertae_sedis; Wallemia	0.00712698
												Perusta	Fungi; Ascomycota; Dothideomycetes; Dothideomycetes_ord_Incertae_sedis; Dothideomycetes_fam_Incertae_sedis; Perusta	0.00647908
												Preussia	Fungi; Ascomycota; Dothideomycetes; Pleosporales; Sporormiaceae; Preussia	0.00647908
												Tapinella	Fungi; Basidiomycota; Agaricomycetes; Boletales; Tapinellaceae; Tapinella	0.00647908
												Botryobasidium	Fungi; Basidiomycota; Agaricomycetes; Cantharellales; Botryobasidiaceae; Botryobasidium	0.00647908
												Bulleribasidium	Fungi; Basidiomycota; Tremellomycetes; Tremellales; Bulleribasidiaceae; Bulleribasidium	0.00647908
												Unidentified-08	Fungi; Ascomycota; Dothideomycetes; Pleosporales; Didymosphaeriaceae; Unidentified	0.00583117
												Microdochium	Fungi; Ascomycota; Sordariomycetes; Xylariales; Microdochiaceae; Microdochium	0.00583117
												Leptosporomyces	Fungi; Basidiomycota; Agaricomycetes; Atheliales; Atheliaceae; Leptosporomyces	0.00583117
												Auricularia	Fungi; Basidiomycota; Agaricomycetes; Auriculariales; Auriculariaceae; Auricularia	0.00583117
												Cinereomyces	Fungi; Basidiomycota; Agaricomycetes; Corticiales; Corticiaceae; Cinereomyces	0.00583117
												Polyporus	Fungi; Basidiomycota; Agaricomycetes; Polyporales; Polyporaceae; Polyporus	0.00583117
												Gloeocystidiellum	Fungi; Basidiomycota; Agaricomycetes; Russulales; Gloeocystidiellaceae; Gloeocystidiellum	0.00583117
												Unidentified-51	Fungi; Basidiomycota; Agaricomycetes; Tremellodendropsidales; Unidentified; Unidentified	0.00583117
												Naganishia	Fungi; Basidiomycota; Tremellomycetes; Filobasidiales; Filobasidiaceae; Naganishia	0.00583117
												Kwoniella	Fungi; Basidiomycota; Tremellomycetes; Tremellales; Cryptococcaceae; Kwoniella	0.00583117
												Unidentified-61	Unidentified; Unidentified; Unidentified; Unidentified; Unidentified; Unidentified	0.00583117
												Penidiella	Fungi; Ascomycota; Dothideomycetes; Capnodiales; Teratosphaeriaceae; Penidiella	0.00518326
												Pyrenochaetopsis	Fungi; Ascomycota; Dothideomycetes; Pleosporales; Cucurbitariaceae; Pyrenochaetopsis	0.00518326
												Knufia	Fungi; Ascomycota; Eurotiomycetes; Chaetothyriales; Trichomeriaceae; Knufia	0.00518326
												Chalara	Fungi; Ascomycota; Leotiomycetes; Helotiales; Helotiales_fam_Incertae_sedis; Chalara	0.00518326
												Cistella	Fungi; Ascomycota; Leotiomycetes; Helotiales; Hyaloscyphaceae; Cistella	0.00518326
												Isaria	Fungi; Ascomycota; Sordariomycetes; Hypocreales; Cordycipitaceae; Isaria	0.00518326
												Unidentified-25	Fungi; Ascomycota; Sordariomycetes; Hypocreales; Cordycipitaceae; Unidentified	0.00518326
												Cylindrobasidium	Fungi; Basidiomycota; Agaricomycetes; Corticiales; Corticiaceae; Cylindrobasidium	0.00518326
												Fuscoporia	Fungi; Basidiomycota; Agaricomycetes; Hymenochaetales; Hymenochaetaceae; Fuscoporia	0.00518326
												Skeletocutis	Fungi; Basidiomycota; Agaricomycetes; Polyporales; Polyporaceae; Skeletocutis	0.00518326
												Bannoa	Fungi; Basidiomycota; Cystobasidiomycetes; Erythrobasidiales; Erythrobasidiaceae; Bannoa	0.00518326
												Tilletia	Fungi; Basidiomycota; Exobasidiomycetes; Tilletiales; Tilletiaceae; Tilletia	0.00518326
												Dissoconium	Fungi; Ascomycota; Dothideomycetes; Capnodiales; Dissoconiaceae; Dissoconium	0.00453535
												Camarosporium	Fungi; Ascomycota; Dothideomycetes; Pleosporales; Pleosporales_fam_Incertae_sedis; Camarosporium	0.00453535
												Marssonina	Fungi; Ascomycota; Leotiomycetes; Helotiales; Dermateaceae; Marssonina	0.00453535
												Pseudoplectania	Fungi; Ascomycota; Pezizomycetes; Pezizales; Sarcosomataceae; Pseudoplectania	0.00453535
												Strickeria	Fungi; Ascomycota; Sordariomycetes; Xylariales; Sporocadaceae; Strickeria	0.00453535
												Crinipellis	Fungi; Basidiomycota; Agaricomycetes; Agaricales; Marasmiaceae; Crinipellis	0.00453535
												{Unknown Family} Auriculariales	Fungi; Basidiomycota; Agaricomycetes; Auriculariales; ;	0.00453535
												Sistotrema	Fungi; Basidiomycota; Agaricomycetes; Cantharellales; Cantharellales_fam_Incertae_sedis; Sistotrema	0.00453535
												Diplomitoporus	Fungi; Basidiomycota; Agaricomycetes; Polyporales; Coriolaceae; Diplomitoporus	0.00453535
												Mycoacia	Fungi; Basidiomycota; Agaricomycetes; Polyporales; Meruliaceae; Mycoacia	0.00453535
												Phaeosphaeria	Fungi; Ascomycota; Dothideomycetes; Pleosporales; Phaeosphaeriaceae; Phaeosphaeria	0.00388745
												Helicoma	Fungi; Ascomycota; Dothideomycetes; Tubeufiales; Tubeufiaceae; Helicoma	0.00388745
												Crocicreas	Fungi; Ascomycota; Leotiomycetes; Helotiales; Helotiaceae; Crocicreas	0.00388745
												Inocybe	Fungi; Basidiomycota; Agaricomycetes; Agaricales; Inocybaceae; Inocybe	0.00388745
												Alutaceodontia	Fungi; Basidiomycota; Agaricomycetes; Polyporales; Schizoporaceae; Alutaceodontia	0.00388745
												Thelephora	Fungi; Basidiomycota; Agaricomycetes; Thelephorales; Thelephoraceae; Thelephora	0.00388745
												Endoconidioma	Fungi; Ascomycota; Dothideomycetes; Dothideales; Dothideaceae; Endoconidioma	0.00323954
												{Unknown Family} Pleosporales	Fungi; Ascomycota; Dothideomycetes; Pleosporales; ;	0.00323954
												Xanthocarpia	Fungi; Ascomycota; Lecanoromycetes; Teloschistales; Teloschistaceae; Xanthocarpia	0.00323954
												Orbilia	Fungi; Ascomycota; Orbiliomycetes; Orbiliales; Orbiliaceae; Orbilia	0.00323954
												Phialea	Fungi; Ascomycota; Pezizomycetes; Pezizales; Pezizales_fam_Incertae_sedis; Phialea	0.00323954
												Desmazierella	Fungi; Ascomycota; Pezizomycetes; Pezizales; Sarcoscyphaceae; Desmazierella	0.00323954
												Chaetomium	Fungi; Ascomycota; Sordariomycetes; Sordariales; Chaetomiaceae; Chaetomium	0.00323954
												Hansfordia	Fungi; Ascomycota; Sordariomycetes; Xylariales; Xylariales_fam_Incertae_sedis; Hansfordia	0.00323954
												Deconica	Fungi; Basidiomycota; Agaricomycetes; Agaricales; Strophariaceae; Deconica	0.00323954
												Minimedusa	Fungi; Basidiomycota; Agaricomycetes; Cantharellales; Cantharellales_fam_Incertae_sedis; Minimedusa	0.00323954
												Unidentified-41	Fungi; Basidiomycota; Agaricomycetes; Corticiales; Unidentified; Unidentified	0.00323954
												Irpex	Fungi; Basidiomycota; Agaricomycetes; Polyporales; Irpicaceae; Irpex	0.00323954
												Trichaptum	Fungi; Basidiomycota; Agaricomycetes; Polyporales; Polyporaceae; Trichaptum	0.00323954
												Unidentified-44	Fungi; Basidiomycota; Agaricomycetes; Polyporales; Polyporaceae; Unidentified	0.00323954
												Mortierella	Fungi; Mortierellomycota; Mortierellomycetes; Mortierellales; Mortierellaceae; Mortierella	0.00323954
												Unidentified-15	Fungi; Ascomycota; Eurotiomycetes; Chaetothyriales; Herpotrichiellaceae; Unidentified	0.00259163
												Trichomerium	Fungi; Ascomycota; Eurotiomycetes; Chaetothyriales; Trichomeriaceae; Trichomerium	0.00259163
												Placynthiella	Fungi; Ascomycota; Lecanoromycetes; Trapeliales; Trapeliaceae; Placynthiella	0.00259163
												Golovinomyces	Fungi; Ascomycota; Leotiomycetes; Erysiphales; Erysiphaceae; Golovinomyces	0.00259163
												Unidentified-18	Fungi; Ascomycota; Leotiomycetes; Helotiales; Helotiaceae; Unidentified	0.00259163
												Moellerodiscus	Fungi; Ascomycota; Leotiomycetes; Helotiales; Sclerotiniaceae; Moellerodiscus	0.00259163
												Metarhizium	Fungi; Ascomycota; Sordariomycetes; Hypocreales; Clavicipitaceae; Metarhizium	0.00259163
												Unidentified-28	Fungi; Ascomycota; Sordariomycetes; Hypocreales; Stachybotryaceae; Unidentified	0.00259163
												Schizothecium	Fungi; Ascomycota; Sordariomycetes; Sordariales; Lasiosphaeriaceae; Schizothecium	0.00259163
												Lycoperdon	Fungi; Basidiomycota; Agaricomycetes; Agaricales; Lycoperdaceae; Lycoperdon	0.00259163
												Collybia	Fungi; Basidiomycota; Agaricomycetes; Agaricales; Tricholomataceae; Collybia	0.00259163
												Lepista	Fungi; Basidiomycota; Agaricomycetes; Agaricales; Tricholomataceae; Lepista	0.00259163
												Resupinatus	Fungi; Basidiomycota; Agaricomycetes; Agaricales; Tricholomataceae; Resupinatus	0.00259163
												Unidentified-37	Fungi; Basidiomycota; Agaricomycetes; Auriculariales; Unidentified; Unidentified	0.00259163
												{Unknown Family} Cantharellales	Fungi; Basidiomycota; Agaricomycetes; Cantharellales; ;	0.00259163
												Neolentinus	Fungi; Basidiomycota; Agaricomycetes; Gloeophyllales; Gloeophyllaceae; Neolentinus	0.00259163
												Phellinus	Fungi; Basidiomycota; Agaricomycetes; Hymenochaetales; Hymenochaetaceae; Phellinus	0.00259163
												Unidentified-42	Fungi; Basidiomycota; Agaricomycetes; Hymenochaetales; Hymenochaetaceae; Unidentified	0.00259163
												Resinicium	Fungi; Basidiomycota; Agaricomycetes; Hymenochaetales; Hymenochaetales_fam_Incertae_sedis; Resinicium	0.00259163
												Gloeoporus	Fungi; Basidiomycota; Agaricomycetes; Polyporales; Meruliaceae; Gloeoporus	0.00259163
												Xylodon	Fungi; Basidiomycota; Agaricomycetes; Polyporales; Schizoporaceae; Xylodon	0.00259163
												Luellia	Fungi; Basidiomycota; Agaricomycetes; Trechisporales; Hydnodontaceae; Luellia	0.00259163
												Rhodosporidiobolus	Fungi; Basidiomycota; Microbotryomycetes; Sporidiobolales; Sporidiobolaceae; Rhodosporidiobolus	0.00259163
												Melampsora	Fungi; Basidiomycota; Pucciniomycetes; Pucciniales; Melampsoraceae; Melampsora	0.00259163
												Sirobasidium	Fungi; Basidiomycota; Tremellomycetes; Tremellales; Sirobasidiaceae; Sirobasidium	0.00259163
												Tranzscheliella	Fungi; Basidiomycota; Ustilaginomycetes; Ustilaginales; Ustilaginaceae; Tranzscheliella	0.00259163
												Ramichloridium	Fungi; Ascomycota; Dothideomycetes; Capnodiales; Dissoconiaceae; Ramichloridium	0.00194372
												Septoria	Fungi; Ascomycota; Dothideomycetes; Capnodiales; Mycosphaerellaceae; Septoria	0.00194372
												Kabatiella	Fungi; Ascomycota; Dothideomycetes; Dothideales; Aureobasidiaceae; Kabatiella	0.00194372
												Thyrostroma	Fungi; Ascomycota; Dothideomycetes; Dothideomycetes_ord_Incertae_sedis; Dothideomycetes_fam_Incertae_sedis; Thyrostroma	0.00194372
												Leptosphaeria	Fungi; Ascomycota; Dothideomycetes; Pleosporales; Leptosphaeriaceae; Leptosphaeria	0.00194372
												Ochrocladosporium	Fungi; Ascomycota; Dothideomycetes; Pleosporales; Pleosporales_fam_Incertae_sedis; Ochrocladosporium	0.00194372
												Venturia	Fungi; Ascomycota; Dothideomycetes; Venturiales; Venturiaceae; Venturia	0.00194372
												Thermomyces	Fungi; Ascomycota; Eurotiomycetes; Eurotiales; Trichocomaceae; Thermomyces	0.00194372
												Phialocephala	Fungi; Ascomycota; Leotiomycetes; Helotiales; Helotiales_fam_Incertae_sedis; Phialocephala	0.00194372
												Tetrachaetum	Fungi; Ascomycota; Leotiomycetes; Helotiales; Helotiales_fam_Incertae_sedis; Tetrachaetum	0.00194372
												Unidentified-19	Fungi; Ascomycota; Leotiomycetes; Helotiales; Hyaloscyphaceae; Unidentified	0.00194372
												Sclerotinia	Fungi; Ascomycota; Leotiomycetes; Helotiales; Sclerotiniaceae; Sclerotinia	0.00194372
												Peziza	Fungi; Ascomycota; Pezizomycetes; Pezizales; Pezizaceae; Peziza	0.00194372
												Candida	Fungi; Ascomycota; Saccharomycetes; Saccharomycetales; Saccharomycetales_fam_Incertae_sedis; Candida	0.00194372
												Gnomonia	Fungi; Ascomycota; Sordariomycetes; Diaporthales; Gnomoniaceae; Gnomonia	0.00194372
												Phaeoacremonium	Fungi; Ascomycota; Sordariomycetes; Togniniales; Togniniaceae; Phaeoacremonium	0.00194372
												Tulostoma	Fungi; Basidiomycota; Agaricomycetes; Agaricales; Agaricaceae; Tulostoma	0.00194372
												Pleurotus	Fungi; Basidiomycota; Agaricomycetes; Agaricales; Pleurotaceae; Pleurotus	0.00194372
												Calyptella	Fungi; Basidiomycota; Agaricomycetes; Agaricales; Tricholomataceae; Calyptella	0.00194372
												Exidiopsis	Fungi; Basidiomycota; Agaricomycetes; Auriculariales; Exidiaceae; Exidiopsis	0.00194372
												Sarcodontia	Fungi; Basidiomycota; Agaricomycetes; Polyporales; Meruliaceae; Sarcodontia	0.00194372
												Schizophyllum	Fungi; Basidiomycota; Agaricomycetes; Polyporales; Schizophyllaceae; Schizophyllum	0.00194372
												Pseudotomentella	Fungi; Basidiomycota; Agaricomycetes; Thelephorales; Thelephoraceae; Pseudotomentella	0.00194372
												Cystobasidium	Fungi; Basidiomycota; Cystobasidiomycetes; Cystobasidiales; Cystobasidiaceae; Cystobasidium	0.00194372
												Leucosporidium	Fungi; Basidiomycota; Microbotryomycetes; Leucosporidiales; Leucosporidiaceae; Leucosporidium	0.00194372
												Rhodotorula	Fungi; Basidiomycota; Microbotryomycetes; Sporidiobolales; Sporidiobolaceae; Rhodotorula	0.00194372
												Unidentified-56	Fungi; Basidiomycota; Tremellomycetes; Tremellales; Tremellaceae; Unidentified	0.00194372
												Saitozyma	Fungi; Basidiomycota; Tremellomycetes; Tremellales; Trimorphomycetaceae; Saitozyma	0.00194372
												{Unknown Phylum} Fungi	Fungi; ; ; ; ;	0.00129582
												Arthothelium	Fungi; Ascomycota; Arthoniomycetes; Arthoniales; Arthoniaceae; Arthothelium	0.00129582
												Monocillium	Fungi; Ascomycota; Ascomycota_cls_Incertae_sedis; Ascomycota_ord_Incertae_sedis; Ascomycota_fam_Incertae_sedis; Monocillium	0.00129582
												Unidentified-01	Fungi; Ascomycota; Dothideomycetes; Botryosphaeriales; Unidentified; Unidentified	0.00129582
												Unidentified-06	Fungi; Ascomycota; Dothideomycetes; Dothideales; Unidentified; Unidentified	0.00129582
												Unidentified-07	Fungi; Ascomycota; Dothideomycetes; Myriangiales; Elsinoaceae; Unidentified	0.00129582
												Acicuseptoria	Fungi; Ascomycota; Dothideomycetes; Pleosporales; Leptosphaeriaceae; Acicuseptoria	0.00129582
												Coniosporium	Fungi; Ascomycota; Eurotiomycetes; Chaetothyriales; Herpotrichiellaceae; Coniosporium	0.00129582
												Chrysosporium	Fungi; Ascomycota; Eurotiomycetes; Onygenales; Onygenales_fam_Incertae_sedis; Chrysosporium	0.00129582
												Unidentified-17	Fungi; Ascomycota; Eurotiomycetes; Unidentified; Unidentified; Unidentified	0.00129582
												Scoliciosporum	Fungi; Ascomycota; Lecanoromycetes; Lecanorales; Lecanoraceae; Scoliciosporum	0.00129582
												Crucellisporiopsis	Fungi; Ascomycota; Leotiomycetes; Helotiales; Hyaloscyphaceae; Crucellisporiopsis	0.00129582
												Unidentified-21	Fungi; Ascomycota; Leotiomycetes; Helotiales; Vibrisseaceae; Unidentified	0.00129582
												Unidentified-23	Fungi; Ascomycota; Leotiomycetes; Unidentified; Unidentified; Unidentified	0.00129582
												Unidentified-24	Fungi; Ascomycota; Pezizomycetes; Pezizales; Unidentified; Unidentified	0.00129582
												Cyberlindnera	Fungi; Ascomycota; Saccharomycetes; Saccharomycetales; Phaffomycetaceae; Cyberlindnera	0.00129582
												Dinemasporium	Fungi; Ascomycota; Sordariomycetes; Chaetosphaeriales; Chaetosphaeriaceae; Dinemasporium	0.00129582
												Pyrigemmula	Fungi; Ascomycota; Sordariomycetes; Chaetosphaeriales; Chaetosphaeriaceae; Pyrigemmula	0.00129582
												Coniochaeta	Fungi; Ascomycota; Sordariomycetes; Coniochaetales; Coniochaetaceae; Coniochaeta	0.00129582
												Verticillium	Fungi; Ascomycota; Sordariomycetes; Glomerellales; Plectosphaerellaceae; Verticillium	0.00129582
												Hypomyces	Fungi; Ascomycota; Sordariomycetes; Hypocreales; Hypocreaceae; Hypomyces	0.00129582
												Gamsia	Fungi; Ascomycota; Sordariomycetes; Microascales; Microascaceae; Gamsia	0.00129582
												Rhodoveronaea	Fungi; Ascomycota; Sordariomycetes; Sordariomycetes_ord_Incertae_sedis; Sordariomycetes_fam_Incertae_sedis; Rhodoveronaea	0.00129582
												Seimatosporium	Fungi; Ascomycota; Sordariomycetes; Xylariales; Amphisphaeriaceae; Seimatosporium	0.00129582
												Bartalinia	Fungi; Ascomycota; Sordariomycetes; Xylariales; Bartaliniaceae; Bartalinia	0.00129582
												{Unknown Family} Agaricales	Fungi; Basidiomycota; Agaricomycetes; Agaricales; ;	0.00129582
												Gymnopilus	Fungi; Basidiomycota; Agaricomycetes; Agaricales; Cortinariaceae; Gymnopilus	0.00129582
												Entoloma	Fungi; Basidiomycota; Agaricomycetes; Agaricales; Entolomataceae; Entoloma	0.00129582
												Rhodocybe	Fungi; Basidiomycota; Agaricomycetes; Agaricales; Entolomataceae; Rhodocybe	0.00129582
												Sagaranella	Fungi; Basidiomycota; Agaricomycetes; Agaricales; Lyophyllaceae; Sagaranella	0.00129582
												Galerina	Fungi; Basidiomycota; Agaricomycetes; Agaricales; Strophariaceae; Galerina	0.00129582
												Typhula	Fungi; Basidiomycota; Agaricomycetes; Agaricales; Typhulaceae; Typhula	0.00129582
												Amyloxenasma	Fungi; Basidiomycota; Agaricomycetes; Amylocorticiales; Amylocorticiaceae; Amyloxenasma	0.00129582
												Botryohypochnus	Fungi; Basidiomycota; Agaricomycetes; Cantharellales; Botryobasidiaceae; Botryohypochnus	0.00129582
												Crustoderma	Fungi; Basidiomycota; Agaricomycetes; Corticiales; Corticiaceae; Crustoderma	0.00129582
												Junghuhnia	Fungi; Basidiomycota; Agaricomycetes; Polyporales; Polyporales_fam_Incertae_sedis; Junghuhnia	0.00129582
												Asterostroma	Fungi; Basidiomycota; Agaricomycetes; Russulales; Lachnocladiaceae; Asterostroma	0.00129582
												Russula	Fungi; Basidiomycota; Agaricomycetes; Russulales; Russulaceae; Russula	0.00129582
												Unidentified-47	Fungi; Basidiomycota; Agaricomycetes; Russulales; Stereaceae; Unidentified	0.00129582
												Sistotremastrum	Fungi; Basidiomycota; Agaricomycetes; Trechisporales; Hydnodontaceae; Sistotremastrum	0.00129582
												Unidentified-53	Fungi; Basidiomycota; Agaricostilbomycetes; Unidentified; Unidentified; Unidentified	0.00129582
												Sakaguchia	Fungi; Basidiomycota; Cystobasidiomycetes; Erythrobasidiales; Erythrobasidiales_fam_Incertae_sedis; Sakaguchia	0.00129582
												Tilletiopsis	Fungi; Basidiomycota; Exobasidiomycetes; Entylomatales; Entylomatales_fam_Incertae_sedis; Tilletiopsis	0.00129582
												Pucciniastrum	Fungi; Basidiomycota; Pucciniomycetes; Pucciniales; Pucciniastraceae; Pucciniastrum	0.00129582
												Septobasidium	Fungi; Basidiomycota; Pucciniomycetes; Septobasidiales; Septobasidiaceae; Septobasidium	0.00129582
												Phaeotremella	Fungi; Basidiomycota; Tremellomycetes; Tremellales; Phaeotremellaceae; Phaeotremella	0.00129582

## Sheet: ITS Leachate
Leachate: Phylum				Leachate: Class				Leachate: Order				Leachate: Genus
Phylum (Aggregated)	Taxonomy	Abundance [%]		Class (Aggregated)	Taxonomy	Abundance [%]		Order (Aggregated)	Taxonomy	Abundance [%]		Genus (Aggregated)	Taxonomy	Abundance [%]
N/A	N/A	93.3757		N/A	N/A	93.3757		N/A	N/A	93.3757		N/A	N/A	93.3757
Ascomycota	k__Fungi, p__Ascomycota	3.50967		Taphrinomycetes	k__Fungi, p__Ascomycota, c__Taphrinomycetes	1.45076		Taphrinales	k__Fungi, p__Ascomycota, c__Taphrinomycetes, o__Taphrinales	1.45076		Taphrina	k__Fungi, p__Ascomycota, c__Taphrinomycetes, o__Taphrinales, f__Taphrinaceae, g__Taphrina	1.45076
Basidiomycota	k__Fungi, p__Basidiomycota	2.62302		Ustilaginomycetes	k__Fungi, p__Basidiomycota, c__Ustilaginomycetes	1.43371		Ustilaginales	k__Fungi, p__Basidiomycota, c__Ustilaginomycetes, o__Ustilaginales	1.43371		Ustilago	k__Fungi, p__Basidiomycota, c__Ustilaginomycetes, o__Ustilaginales, f__Ustilaginaceae, g__Ustilago	1.34987
unidentified	k__Fungi, p__unidentified	0.468903		Dothideomycetes	k__Fungi, p__Ascomycota, c__Dothideomycetes	0.954857		Pleosporales	k__Fungi, p__Ascomycota, c__Dothideomycetes, o__Pleosporales	0.620942		unidentified-35	k__Fungi, p__Basidiomycota, c__Pucciniomycetes, o__unidentified, f__unidentified, g__unidentified	0.620942
Rozellomycota	k__Fungi, p__Rozellomycota	0.0227347		Pucciniomycetes	k__Fungi, p__Basidiomycota, c__Pucciniomycetes	0.620942		unidentified-05	k__Fungi, p__Basidiomycota, c__Pucciniomycetes, o__unidentified	0.620942		unidentified-46	k__Fungi, p__unidentified, c__unidentified, o__unidentified, f__unidentified, g__unidentified	0.468903
				Sordariomycetes	k__Fungi, p__Ascomycota, c__Sordariomycetes	0.508689		unidentified-10	k__Fungi, p__unidentified, c__unidentified, o__unidentified	0.468903		unidentified-05	k__Fungi, p__Ascomycota, c__Dothideomycetes, o__Pleosporales, f__unidentified, g__unidentified	0.235873
				unidentified-5	k__Fungi, p__unidentified, c__unidentified	0.468903		Agaricales	k__Fungi, p__Basidiomycota, c__Agaricomycetes, o__Agaricales	0.412066		Cladosporium	k__Fungi, p__Ascomycota, c__Dothideomycetes, o__Capnodiales, f__Cladosporiaceae, g__Cladosporium	0.181878
				Agaricomycetes	k__Fungi, p__Basidiomycota, c__Agaricomycetes	0.453273		Capnodiales	k__Fungi, p__Ascomycota, c__Dothideomycetes, o__Capnodiales	0.218821		unidentified-08	k__Fungi, p__Ascomycota, c__Eurotiomycetes, o__Chaetothyriales, f__unidentified, g__unidentified	0.166247
				Eurotiomycetes	k__Fungi, p__Ascomycota, c__Eurotiomycetes	0.26287		Chaetothyriales	k__Fungi, p__Ascomycota, c__Eurotiomycetes, o__Chaetothyriales	0.18614		{Unknown Family} Agaricales	k__Fungi, p__Basidiomycota, c__Agaricomycetes, o__Agaricales, ,	0.157722
				Lecanoromycetes	k__Fungi, p__Ascomycota, c__Lecanoromycetes	0.103727		Hypocreales	k__Fungi, p__Ascomycota, c__Sordariomycetes, o__Hypocreales	0.13925		Coprinellus	k__Fungi, p__Basidiomycota, c__Agaricomycetes, o__Agaricales, f__Psathyrellaceae, g__Coprinellus	0.156301
				Cystobasidiomycetes	k__Fungi, p__Basidiomycota, c__Cystobasidiomycetes	0.0838342		unidentified-01	k__Fungi, p__Ascomycota, c__Dothideomycetes, o__unidentified	0.115094		Sclerostagonospora	k__Fungi, p__Ascomycota, c__Dothideomycetes, o__Pleosporales, f__Phaeosphaeriaceae, g__Sclerostagonospora	0.13925
				Leotiomycetes	k__Fungi, p__Ascomycota, c__Leotiomycetes	0.0781505		Glomerellales	k__Fungi, p__Ascomycota, c__Sordariomycetes, o__Glomerellales	0.109411		Pyrenochaetopsis	k__Fungi, p__Ascomycota, c__Dothideomycetes, o__Pleosporales, f__Cucurbitariaceae, g__Pyrenochaetopsis	0.125041
				unidentified-1	k__Fungi, p__Ascomycota, c__unidentified	0.0781505		unidentified-02	k__Fungi, p__Ascomycota, c__Sordariomycetes, o__unidentified	0.0895179		unidentified-06	k__Fungi, p__Ascomycota, c__Dothideomycetes, o__unidentified, f__unidentified, g__unidentified	0.115094
				Saccharomycetes	k__Fungi, p__Ascomycota, c__Saccharomycetes	0.0724669		Cystobasidiales	k__Fungi, p__Basidiomycota, c__Cystobasidiomycetes, o__Cystobasidiales	0.0838342		Gibellulopsis	k__Fungi, p__Ascomycota, c__Sordariomycetes, o__Glomerellales, f__Plectosphaerellaceae, g__Gibellulopsis	0.109411
				Malasseziomycetes	k__Fungi, p__Basidiomycota, c__Malasseziomycetes	0.0312602		Coniochaetales	k__Fungi, p__Ascomycota, c__Sordariomycetes, o__Coniochaetales	0.0838342		Nectria	k__Fungi, p__Ascomycota, c__Sordariomycetes, o__Hypocreales, f__Nectriaceae, g__Nectria	0.0966225
				unidentified-4	k__Fungi, p__Rozellomycota, c__unidentified	0.0227347		unidentified-03	k__Fungi, p__Ascomycota, c__unidentified, o__unidentified	0.0781505		unidentified-24	k__Fungi, p__Ascomycota, c__Sordariomycetes, o__unidentified, f__unidentified, g__unidentified	0.0895179
								Eurotiales	k__Fungi, p__Ascomycota, c__Eurotiomycetes, o__Eurotiales	0.0767296		unidentified-40	k__Fungi, p__Basidiomycota, c__Ustilaginomycetes, o__Ustilaginales, f__Ustilaginaceae, g__unidentified	0.0838342
								Saccharomycetales	k__Fungi, p__Ascomycota, c__Saccharomycetes, o__Saccharomycetales	0.0724669		Coniochaeta	k__Fungi, p__Ascomycota, c__Sordariomycetes, o__Coniochaetales, f__Coniochaetaceae, g__Coniochaeta	0.0838342
								Teloschistales	k__Fungi, p__Ascomycota, c__Lecanoromycetes, o__Teloschistales	0.0653623		unidentified-27	k__Fungi, p__Ascomycota, c__unidentified, o__unidentified, f__unidentified, g__unidentified	0.0781505
								Diaporthales	k__Fungi, p__Ascomycota, c__Sordariomycetes, o__Diaporthales	0.052574		Candida	k__Fungi, p__Ascomycota, c__Saccharomycetes, o__Saccharomycetales, f__Saccharomycetales_fam_Incertae_sedis, g__Candida	0.0667832
								Helotiales	k__Fungi, p__Ascomycota, c__Leotiomycetes, o__Helotiales	0.0426276		Occultifur	k__Fungi, p__Basidiomycota, c__Cystobasidiomycetes, o__Cystobasidiales, f__Cystobasidiales_fam_Incertae_sedis, g__Occultifur	0.0667832
								Lecanorales	k__Fungi, p__Ascomycota, c__Lecanoromycetes, o__Lecanorales	0.0383648		Xanthoria	k__Fungi, p__Ascomycota, c__Lecanoromycetes, o__Teloschistales, f__Teloschistaceae, g__Xanthoria	0.0653623
								Leotiomycetes_ord_Incertae_sedis	k__Fungi, p__Ascomycota, c__Leotiomycetes, o__Leotiomycetes_ord_Incertae_sedis	0.035523		Periconia	k__Fungi, p__Ascomycota, c__Dothideomycetes, o__Pleosporales, f__Periconiaceae, g__Periconia	0.0539949
								Malasseziales	k__Fungi, p__Basidiomycota, c__Malasseziomycetes, o__Malasseziales	0.0312602		Gnomonia	k__Fungi, p__Ascomycota, c__Sordariomycetes, o__Diaporthales, f__Gnomoniaceae, g__Gnomonia	0.052574
								unidentified-09	k__Fungi, p__Rozellomycota, c__unidentified, o__unidentified	0.0227347		Talaromyces	k__Fungi, p__Ascomycota, c__Eurotiomycetes, o__Eurotiales, f__Trichocomaceae, g__Talaromyces	0.0440485
								Sordariales	k__Fungi, p__Ascomycota, c__Sordariomycetes, o__Sordariales	0.0184719		Ciboria	k__Fungi, p__Ascomycota, c__Leotiomycetes, o__Helotiales, f__Sclerotiniaceae, g__Ciboria	0.0426276
								Russulales	k__Fungi, p__Basidiomycota, c__Agaricomycetes, o__Russulales	0.0184719		Scoliciosporum	k__Fungi, p__Ascomycota, c__Lecanoromycetes, o__Lecanorales, f__Lecanoraceae, g__Scoliciosporum	0.0383648
								Hymenochaetales	k__Fungi, p__Basidiomycota, c__Agaricomycetes, o__Hymenochaetales	0.017051		Mycosphaerella	k__Fungi, p__Ascomycota, c__Dothideomycetes, o__Capnodiales, f__Mycosphaerellaceae, g__Mycosphaerella	0.0369439
								Xylariales	k__Fungi, p__Ascomycota, c__Sordariomycetes, o__Xylariales	0.0156301		unidentified-11	k__Fungi, p__Ascomycota, c__Leotiomycetes, o__Leotiomycetes_ord_Incertae_sedis, f__Pseudeurotiaceae, g__unidentified	0.035523
								Corticiales	k__Fungi, p__Basidiomycota, c__Agaricomycetes, o__Corticiales	0.00568368		Lycoperdon	k__Fungi, p__Basidiomycota, c__Agaricomycetes, o__Agaricales, f__Lycoperdaceae, g__Lycoperdon	0.0341021
												Psathyrella	k__Fungi, p__Basidiomycota, c__Agaricomycetes, o__Agaricales, f__Psathyrellaceae, g__Psathyrella	0.0341021
												Malassezia	k__Fungi, p__Basidiomycota, c__Malasseziomycetes, o__Malasseziales, f__Malasseziaceae, g__Malassezia	0.0312602
												Keissleriella	k__Fungi, p__Ascomycota, c__Dothideomycetes, o__Pleosporales, f__Lentitheciaceae, g__Keissleriella	0.0312602
												Penicillium	k__Fungi, p__Ascomycota, c__Eurotiomycetes, o__Eurotiales, f__Aspergillaceae, g__Penicillium	0.0284184
												Paraconiothyrium	k__Fungi, p__Ascomycota, c__Dothideomycetes, o__Pleosporales, f__Didymosphaeriaceae, g__Paraconiothyrium	0.0284184
												unidentified-45	k__Fungi, p__Rozellomycota, c__unidentified, o__unidentified, f__unidentified, g__unidentified	0.0227347
												unidentified-07	k__Fungi, p__Ascomycota, c__Eurotiomycetes, o__Chaetothyriales, f__Herpotrichiellaceae, g__unidentified	0.0198929
												Chaetomium	k__Fungi, p__Ascomycota, c__Sordariomycetes, o__Sordariales, f__Chaetomiaceae, g__Chaetomium	0.0184719
												unidentified-32	k__Fungi, p__Basidiomycota, c__Agaricomycetes, o__Russulales, f__unidentified, g__unidentified	0.0184719
												Acremonium	k__Fungi, p__Ascomycota, c__Sordariomycetes, o__Hypocreales, f__Hypocreales_fam_Incertae_sedis, g__Acremonium	0.017051
												Cystobasidium	k__Fungi, p__Basidiomycota, c__Cystobasidiomycetes, o__Cystobasidiales, f__Cystobasidiaceae, g__Cystobasidium	0.017051
												Resinicium	k__Fungi, p__Basidiomycota, c__Agaricomycetes, o__Hymenochaetales, f__Hymenochaetales_fam_Incertae_sedis, g__Resinicium	0.017051
												unidentified-29	k__Fungi, p__Basidiomycota, c__Agaricomycetes, o__Agaricales, f__unidentified, g__unidentified	0.0156301
												unidentified-25	k__Fungi, p__Ascomycota, c__Sordariomycetes, o__Xylariales, f__Diatrypaceae, g__unidentified	0.0156301
												Hypholoma	k__Fungi, p__Basidiomycota, c__Agaricomycetes, o__Agaricales, f__Strophariaceae, g__Hypholoma	0.0142092
												unidentified-19	k__Fungi, p__Ascomycota, c__Sordariomycetes, o__Hypocreales, f__unidentified, g__unidentified	0.0127883
												Sarocladium	k__Fungi, p__Ascomycota, c__Sordariomycetes, o__Hypocreales, f__Hypocreales_fam_Incertae_sedis, g__Sarocladium	0.0127883
												Didymella	k__Fungi, p__Ascomycota, c__Dothideomycetes, o__Pleosporales, f__Didymellaceae, g__Didymella	0.00710459
												Hyphodontia	k__Fungi, p__Basidiomycota, c__Agaricomycetes, o__Corticiales, f__Corticiaceae, g__Hyphodontia	0.00568368
												Yamadazyma	k__Fungi, p__Ascomycota, c__Saccharomycetes, o__Saccharomycetales, f__Debaryomycetaceae, g__Yamadazyma	0.00568368
												Aspergillus	k__Fungi, p__Ascomycota, c__Eurotiomycetes, o__Eurotiales, f__Aspergillaceae, g__Aspergillus	0.00426276

## Sheet: ITS Soil
Soil: Phylum				Soil: Class				Soil: Order				Soil: Genus
Phylum (Aggregated)	Taxonomy	Abundance [%]		Class (Aggregated)	Taxonomy	Abundance [%]		Order (Aggregated)	Taxonomy	Abundance [%]		Genus (Aggregated)	Taxonomy	Abundance [%]
Ascomycota	k__Fungi, p__Ascomycota	33.6184		Mortierellomycetes	k__Fungi, p__Mortierellomycota, c__Mortierellomycetes	31.867		Mortierellales	k__Fungi, p__Mortierellomycota, c__Mortierellomycetes, o__Mortierellales	31.867		Mortierella	k__Fungi, p__Mortierellomycota, c__Mortierellomycetes, o__Mortierellales, f__Mortierellaceae, g__Mortierella	31.867
Mortierellomycota	k__Fungi, p__Mortierellomycota	31.867		N/A	N/A	20.7939		N/A	N/A	20.7939		N/A	N/A	20.7939
N/A	N/A	20.7939		Sordariomycetes	k__Fungi, p__Ascomycota, c__Sordariomycetes	14.4734		Agaricales	k__Fungi, p__Basidiomycota, c__Agaricomycetes, o__Agaricales	9.59969		Lindtneria	k__Fungi, p__Basidiomycota, c__Agaricomycetes, o__Agaricales, f__Stephanosporaceae, g__Lindtneria	8.03187
Basidiomycota	k__Fungi, p__Basidiomycota	11.4536		Agaricomycetes	k__Fungi, p__Basidiomycota, c__Agaricomycetes	10.1596		Hypocreales	k__Fungi, p__Ascomycota, c__Sordariomycetes, o__Hypocreales	9.53201		Metarhizium	k__Fungi, p__Ascomycota, c__Sordariomycetes, o__Hypocreales, f__Clavicipitaceae, g__Metarhizium	4.03593
unidentified	k__Fungi, p__unidentified	1.30942		Eurotiomycetes	k__Fungi, p__Ascomycota, c__Eurotiomycetes	7.61864		Pleosporales	k__Fungi, p__Ascomycota, c__Dothideomycetes, o__Pleosporales	6.38407		Exophiala	k__Fungi, p__Ascomycota, c__Eurotiomycetes, o__Chaetothyriales, f__Herpotrichiellaceae, g__Exophiala	3.83085
Rozellomycota	k__Fungi, p__Rozellomycota	0.628563		Dothideomycetes	k__Fungi, p__Ascomycota, c__Dothideomycetes	7.29667		Chaetothyriales	k__Fungi, p__Ascomycota, c__Eurotiomycetes, o__Chaetothyriales	4.15898		unidentified-05	k__Fungi, p__Ascomycota, c__Dothideomycetes, o__Pleosporales, f__unidentified, g__unidentified	3.49042
Cercozoa	k__Protista, p__Cercozoa	0.087158		Leotiomycetes	k__Fungi, p__Ascomycota, c__Leotiomycetes	2.2333		Eurotiales	k__Fungi, p__Ascomycota, c__Eurotiomycetes, o__Eurotiales	3.4289		Penicillium	k__Fungi, p__Ascomycota, c__Eurotiomycetes, o__Eurotiales, f__Aspergillaceae, g__Penicillium	3.38173
Chytridiomycota	k__Fungi, p__Chytridiomycota	0.073828		unidentified-1	k__Fungi, p__Ascomycota, c__unidentified	1.85595		Helotiales	k__Fungi, p__Ascomycota, c__Leotiomycetes, o__Helotiales	1.94106		Pyrenochaetopsis	k__Fungi, p__Ascomycota, c__Dothideomycetes, o__Pleosporales, f__Cucurbitariaceae, g__Pyrenochaetopsis	1.89902
{Unknown Phylum} Fungi	k__Fungi,	0.0717772		unidentified-5	k__Fungi, p__unidentified, c__unidentified	1.30942		unidentified-03	k__Fungi, p__Ascomycota, c__unidentified, o__unidentified	1.85595		unidentified-27	k__Fungi, p__Ascomycota, c__unidentified, o__unidentified, f__unidentified, g__unidentified	1.85595
Olpidiomycota	k__Fungi, p__Olpidiomycota	0.0451171		Cystobasidiomycetes	k__Fungi, p__Basidiomycota, c__Cystobasidiomycetes	0.544481		unidentified-02	k__Fungi, p__Ascomycota, c__Sordariomycetes, o__unidentified	1.75034		unidentified-24	k__Fungi, p__Ascomycota, c__Sordariomycetes, o__unidentified, f__unidentified, g__unidentified	1.75034
Glomeromycota	k__Fungi, p__Glomeromycota	0.0430663		Rozellomycota_cls_Incertae_sedis	k__Fungi, p__Rozellomycota, c__Rozellomycota_cls_Incertae_sedis	0.520897		Sordariales	k__Fungi, p__Ascomycota, c__Sordariomycetes, o__Sordariales	1.65395		unidentified-19	k__Fungi, p__Ascomycota, c__Sordariomycetes, o__Hypocreales, f__unidentified, g__unidentified	1.50425
Zoopagomycota	k__Fungi, p__Zoopagomycota	0.00820311		Tremellomycetes	k__Fungi, p__Basidiomycota, c__Tremellomycetes	0.486034		unidentified-10	k__Fungi, p__unidentified, c__unidentified, o__unidentified	1.30942		unidentified-46	k__Fungi, p__unidentified, c__unidentified, o__unidentified, f__unidentified, g__unidentified	1.30942
				unidentified-2	k__Fungi, p__Basidiomycota, c__unidentified	0.138427		Chaetosphaeriales	k__Fungi, p__Ascomycota, c__Sordariomycetes, o__Chaetosphaeriales	0.889012		Clonostachys	k__Fungi, p__Ascomycota, c__Sordariomycetes, o__Hypocreales, f__Bionectriaceae, g__Clonostachys	0.97617
				unidentified-4	k__Fungi, p__Rozellomycota, c__unidentified	0.107666		Capnodiales	k__Fungi, p__Ascomycota, c__Dothideomycetes, o__Capnodiales	0.815184		Trichoderma	k__Fungi, p__Ascomycota, c__Sordariomycetes, o__Hypocreales, f__Hypocreaceae, g__Trichoderma	0.929002
				unidentified-6	k__Protista, p__Cercozoa, c__unidentified	0.087158		GS07	k__Fungi, p__Rozellomycota, c__Rozellomycota_cls_Incertae_sedis, o__GS07	0.520897		Chloridium	k__Fungi, p__Ascomycota, c__Sordariomycetes, o__Chaetosphaeriales, f__Chaetosphaeriaceae, g__Chloridium	0.801854
				Saccharomycetes	k__Fungi, p__Ascomycota, c__Saccharomycetes	0.0769041		Cystobasidiomycetes_ord_Incertae_sedis	k__Fungi, p__Basidiomycota, c__Cystobasidiomycetes, o__Cystobasidiomycetes_ord_Incertae_sedis	0.510644		unidentified-22	k__Fungi, p__Ascomycota, c__Sordariomycetes, o__Sordariales, f__Lasiosphaeriaceae, g__unidentified	0.731102
				{Unknown Phylum} Fungi	k__Fungi, ,	0.0717772		Microascales	k__Fungi, p__Ascomycota, c__Sordariomycetes, o__Microascales	0.321972		unidentified-10	k__Fungi, p__Ascomycota, c__Leotiomycetes, o__Helotiales, f__unidentified, g__unidentified	0.642919
				Rhizophydiomycetes	k__Fungi, p__Chytridiomycota, c__Rhizophydiomycetes	0.0584472		Leotiomycetes_ord_Incertae_sedis	k__Fungi, p__Ascomycota, c__Leotiomycetes, o__Leotiomycetes_ord_Incertae_sedis	0.261474		Schizothecium	k__Fungi, p__Ascomycota, c__Sordariomycetes, o__Sordariales, f__Lasiosphaeriaceae, g__Schizothecium	0.586522
				Ustilaginomycetes	k__Fungi, p__Basidiomycota, c__Ustilaginomycetes	0.0543456		Tremellales	k__Fungi, p__Basidiomycota, c__Tremellomycetes, o__Tremellales	0.254296		unidentified-44	k__Fungi, p__Rozellomycota, c__Rozellomycota_cls_Incertae_sedis, o__GS07, f__unidentified, g__unidentified	0.520897
				Olpidiomycetes	k__Fungi, p__Olpidiomycota, c__Olpidiomycetes	0.0451171		Polyporales	k__Fungi, p__Basidiomycota, c__Agaricomycetes, o__Polyporales	0.163037		Buckleyzyma	k__Fungi, p__Basidiomycota, c__Cystobasidiomycetes, o__Cystobasidiomycetes_ord_Incertae_sedis, f__Cystobasidiomycetes_fam_Incertae_sedis, g__Buckleyzyma	0.510644
				Glomeromycetes	k__Fungi, p__Glomeromycota, c__Glomeromycetes	0.0430663		Corticiales	k__Fungi, p__Basidiomycota, c__Agaricomycetes, o__Corticiales	0.155859		unidentified-09	k__Fungi, p__Ascomycota, c__Leotiomycetes, o__Helotiales, f__Helotiaceae, g__unidentified	0.476806
				Pezizomycetes	k__Fungi, p__Ascomycota, c__Pezizomycetes	0.0399902		Xylariales	k__Fungi, p__Ascomycota, c__Sordariomycetes, o__Xylariales	0.153808		Acremonium	k__Fungi, p__Ascomycota, c__Sordariomycetes, o__Hypocreales, f__Hypocreales_fam_Incertae_sedis, g__Acremonium	0.394775
				Malasseziomycetes	k__Fungi, p__Basidiomycota, c__Malasseziomycetes	0.0399902		unidentified-07	k__Fungi, p__Basidiomycota, c__unidentified, o__unidentified	0.138427		unidentified-29	k__Fungi, p__Basidiomycota, c__Agaricomycetes, o__Agaricales, f__unidentified, g__unidentified	0.393749
				Microbotryomycetes	k__Fungi, p__Basidiomycota, c__Microbotryomycetes	0.0307617		unidentified-09	k__Fungi, p__Rozellomycota, c__unidentified, o__unidentified	0.107666		unidentified-16	k__Fungi, p__Ascomycota, c__Sordariomycetes, o__Hypocreales, f__Nectriaceae, g__unidentified	0.391698
				Ascomycota_cls_Incertae_sedis	k__Fungi, p__Ascomycota, c__Ascomycota_cls_Incertae_sedis	0.0235839		Boletales	k__Fungi, p__Basidiomycota, c__Agaricomycetes, o__Boletales	0.0974119		Mycosphaerella	k__Fungi, p__Ascomycota, c__Dothideomycetes, o__Capnodiales, f__Mycosphaerellaceae, g__Mycosphaerella	0.362988
				unidentified-3	k__Fungi, p__Chytridiomycota, c__unidentified	0.0153808		unidentified-01	k__Fungi, p__Ascomycota, c__Dothideomycetes, o__unidentified	0.0912596		Encoelia	k__Fungi, p__Ascomycota, c__Leotiomycetes, o__Helotiales, f__Sclerotiniaceae, g__Encoelia	0.350683
				Zoopagomycetes	k__Fungi, p__Zoopagomycota, c__Zoopagomycetes	0.00820311		unidentified-11	k__Protista, p__Cercozoa, c__unidentified, o__unidentified	0.087158		unidentified-01	k__Fungi, p__Ascomycota, c__Dothideomycetes, o__Pleosporales, f__Didymosphaeriaceae, g__unidentified	0.341454
								Saccharomycetales	k__Fungi, p__Ascomycota, c__Saccharomycetes, o__Saccharomycetales	0.0769041		{Unknown Family} Helotiales	k__Fungi, p__Ascomycota, c__Leotiomycetes, o__Helotiales, ,	0.321972
								Myrmecridiales	k__Fungi, p__Ascomycota, c__Sordariomycetes, o__Myrmecridiales	0.0758788		Cladosporium	k__Fungi, p__Ascomycota, c__Dothideomycetes, o__Capnodiales, f__Cladosporiaceae, g__Cladosporium	0.27583
								Filobasidiales	k__Fungi, p__Basidiomycota, c__Tremellomycetes, o__Filobasidiales	0.0728026		Pseudeurotium	k__Fungi, p__Ascomycota, c__Leotiomycetes, o__Leotiomycetes_ord_Incertae_sedis, f__Pseudeurotiaceae, g__Pseudeurotium	0.257373
								{Unknown Phylum} Fungi	k__Fungi, , ,	0.0717772		Fusarium	k__Fungi, p__Ascomycota, c__Sordariomycetes, o__Hypocreales, f__Nectriaceae, g__Fusarium	0.243017
								unidentified-06	k__Fungi, p__Basidiomycota, c__Tremellomycetes, o__unidentified	0.0666503		Didymella	k__Fungi, p__Ascomycota, c__Dothideomycetes, o__Pleosporales, f__Didymellaceae, g__Didymella	0.214306
								Rhizophydiales	k__Fungi, p__Chytridiomycota, c__Rhizophydiomycetes, o__Rhizophydiales	0.0584472		Purpureocillium	k__Fungi, p__Ascomycota, c__Sordariomycetes, o__Hypocreales, f__Ophiocordycipitaceae, g__Purpureocillium	0.203027
								Ustilaginales	k__Fungi, p__Basidiomycota, c__Ustilaginomycetes, o__Ustilaginales	0.0543456		unidentified-08	k__Fungi, p__Ascomycota, c__Eurotiomycetes, o__Chaetothyriales, f__unidentified, g__unidentified	0.189697
								Olpidiales	k__Fungi, p__Olpidiomycota, c__Olpidiomycetes, o__Olpidiales	0.0451171		unidentified-20	k__Fungi, p__Ascomycota, c__Sordariomycetes, o__Microascales, f__unidentified, g__unidentified	0.186621
								Glomerellales	k__Fungi, p__Ascomycota, c__Sordariomycetes, o__Glomerellales	0.0440917		Coprinellus	k__Fungi, p__Basidiomycota, c__Agaricomycetes, o__Agaricales, f__Psathyrellaceae, g__Coprinellus	0.182519
								Holtermanniales	k__Fungi, p__Basidiomycota, c__Tremellomycetes, o__Holtermanniales	0.0430663		Periconia	k__Fungi, p__Ascomycota, c__Dothideomycetes, o__Pleosporales, f__Periconiaceae, g__Periconia	0.168164
								Glomerales	k__Fungi, p__Glomeromycota, c__Glomeromycetes, o__Glomerales	0.0430663		unidentified-31	k__Fungi, p__Basidiomycota, c__Agaricomycetes, o__Polyporales, f__unidentified, g__unidentified	0.15791
								Pezizales	k__Fungi, p__Ascomycota, c__Pezizomycetes, o__Pezizales	0.0399902		Hyphodontia	k__Fungi, p__Basidiomycota, c__Agaricomycetes, o__Corticiales, f__Corticiaceae, g__Hyphodontia	0.155859
								Thelephorales	k__Fungi, p__Basidiomycota, c__Agaricomycetes, o__Thelephorales	0.0399902		Papiliotrema	k__Fungi, p__Basidiomycota, c__Tremellomycetes, o__Tremellales, f__Rhynchogastremataceae, g__Papiliotrema	0.145605
								Malasseziales	k__Fungi, p__Basidiomycota, c__Malasseziomycetes, o__Malasseziales	0.0399902		Neurospora	k__Fungi, p__Ascomycota, c__Sordariomycetes, o__Sordariales, f__Sordariaceae, g__Neurospora	0.143554
								unidentified-04	k__Fungi, p__Basidiomycota, c__Agaricomycetes, o__unidentified	0.0328124		Beauveria	k__Fungi, p__Ascomycota, c__Sordariomycetes, o__Hypocreales, f__Cordycipitaceae, g__Beauveria	0.141504
								Onygenales	k__Fungi, p__Ascomycota, c__Eurotiomycetes, o__Onygenales	0.0307617		Volutella	k__Fungi, p__Ascomycota, c__Sordariomycetes, o__Hypocreales, f__Nectriaceae, g__Volutella	0.141504
								Thelebolales	k__Fungi, p__Ascomycota, c__Leotiomycetes, o__Thelebolales	0.0307617		Ilyonectria	k__Fungi, p__Ascomycota, c__Sordariomycetes, o__Hypocreales, f__Nectriaceae, g__Ilyonectria	0.140478
								Trechisporales	k__Fungi, p__Basidiomycota, c__Agaricomycetes, o__Trechisporales	0.0276855		Clavaria	k__Fungi, p__Basidiomycota, c__Agaricomycetes, o__Agaricales, f__Clavariaceae, g__Clavaria	0.139453
								Cystofilobasidiales	k__Fungi, p__Basidiomycota, c__Tremellomycetes, o__Cystofilobasidiales	0.0266601		unidentified-39	k__Fungi, p__Basidiomycota, c__unidentified, o__unidentified, f__unidentified, g__unidentified	0.138427
								Ascomycota_ord_Incertae_sedis	k__Fungi, p__Ascomycota, c__Ascomycota_cls_Incertae_sedis, o__Ascomycota_ord_Incertae_sedis	0.0235839		unidentified-28	k__Fungi, p__Basidiomycota, c__Agaricomycetes, o__Agaricales, f__Clavariaceae, g__unidentified	0.133301
								Trichosporonales	k__Fungi, p__Basidiomycota, c__Tremellomycetes, o__Trichosporonales	0.0225585		Arthrinium	k__Fungi, p__Ascomycota, c__Sordariomycetes, o__Xylariales, f__Apiosporaceae, g__Arthrinium	0.122021
								Pleurotheciales	k__Fungi, p__Ascomycota, c__Sordariomycetes, o__Pleurotheciales	0.0194824		Gamsia	k__Fungi, p__Ascomycota, c__Sordariomycetes, o__Microascales, f__Microascaceae, g__Gamsia	0.113818
								Cystobasidiales	k__Fungi, p__Basidiomycota, c__Cystobasidiomycetes, o__Cystobasidiales	0.018457		unidentified-45	k__Fungi, p__Rozellomycota, c__unidentified, o__unidentified, f__unidentified, g__unidentified	0.107666
								Auriculariales	k__Fungi, p__Basidiomycota, c__Agaricomycetes, o__Auriculariales	0.0174316		unidentified-03	k__Fungi, p__Ascomycota, c__Dothideomycetes, o__Pleosporales, f__Phaeosphaeriaceae, g__unidentified	0.10459
								Russulales	k__Fungi, p__Basidiomycota, c__Agaricomycetes, o__Russulales	0.0174316		unidentified-07	k__Fungi, p__Ascomycota, c__Eurotiomycetes, o__Chaetothyriales, f__Herpotrichiellaceae, g__unidentified	0.0953611
								Coniochaetales	k__Fungi, p__Ascomycota, c__Sordariomycetes, o__Coniochaetales	0.0153808		unidentified-06	k__Fungi, p__Ascomycota, c__Dothideomycetes, o__unidentified, f__unidentified, g__unidentified	0.0912596
								Erythrobasidiales	k__Fungi, p__Basidiomycota, c__Cystobasidiomycetes, o__Erythrobasidiales	0.0153808		Hypholoma	k__Fungi, p__Basidiomycota, c__Agaricomycetes, o__Agaricales, f__Strophariaceae, g__Hypholoma	0.0912596
								unidentified-08	k__Fungi, p__Chytridiomycota, c__unidentified, o__unidentified	0.0153808		Oidiodendron	k__Fungi, p__Ascomycota, c__Leotiomycetes, o__Helotiales, f__Myxotrichaceae, g__Oidiodendron	0.0902342
								Togniniales	k__Fungi, p__Ascomycota, c__Sordariomycetes, o__Togniniales	0.0143554		Chaetosphaeria	k__Fungi, p__Ascomycota, c__Sordariomycetes, o__Chaetosphaeriales, f__Chaetosphaeriaceae, g__Chaetosphaeria	0.087158
								Sporidiobolales	k__Fungi, p__Basidiomycota, c__Microbotryomycetes, o__Sporidiobolales	0.0143554		unidentified-47	k__Protista, p__Cercozoa, c__unidentified, o__unidentified, f__unidentified, g__unidentified	0.087158
								Microbotryomycetes_ord_Incertae_sedis	k__Fungi, p__Basidiomycota, c__Microbotryomycetes, o__Microbotryomycetes_ord_Incertae_sedis	0.0123047		Lacrymaria	k__Fungi, p__Basidiomycota, c__Agaricomycetes, o__Agaricales, f__Agaricaceae, g__Lacrymaria	0.0861326
								Cantharellales	k__Fungi, p__Basidiomycota, c__Agaricomycetes, o__Cantharellales	0.00820311		Coprinopsis	k__Fungi, p__Basidiomycota, c__Agaricomycetes, o__Agaricales, f__Psathyrellaceae, g__Coprinopsis	0.0861326
								Zoopagales	k__Fungi, p__Zoopagomycota, c__Zoopagomycetes, o__Zoopagales	0.00820311		unidentified-13	k__Fungi, p__Ascomycota, c__Sordariomycetes, o__Hypocreales, f__Clavicipitaceae, g__unidentified	0.0830565
								Dothideales	k__Fungi, p__Ascomycota, c__Dothideomycetes, o__Dothideales	0.00615233		Antennariella	k__Fungi, p__Ascomycota, c__Dothideomycetes, o__Capnodiales, f__Capnodiaceae, g__Antennariella	0.0820311
								Leucosporidiales	k__Fungi, p__Basidiomycota, c__Microbotryomycetes, o__Leucosporidiales	0.00410155		Melanogaster	k__Fungi, p__Basidiomycota, c__Agaricomycetes, o__Boletales, f__Melanogastraceae, g__Melanogaster	0.0779295
								Savoryellales	k__Fungi, p__Ascomycota, c__Sordariomycetes, o__Savoryellales	0.00307617		Myrmecridium	k__Fungi, p__Ascomycota, c__Sordariomycetes, o__Myrmecridiales, f__Myrmecridiaceae, g__Myrmecridium	0.0758788
												Chaetomium	k__Fungi, p__Ascomycota, c__Sordariomycetes, o__Sordariales, f__Chaetomiaceae, g__Chaetomium	0.0748534
												unidentified-18	k__Fungi, p__Ascomycota, c__Sordariomycetes, o__Hypocreales, f__Stachybotryaceae, g__unidentified	0.073828
												{Unknown Phylum} Fungi	k__Fungi, , , , ,	0.0717772
												unidentified-38	k__Fungi, p__Basidiomycota, c__Tremellomycetes, o__unidentified, f__unidentified, g__unidentified	0.0666503
												Melanoleuca	k__Fungi, p__Basidiomycota, c__Agaricomycetes, o__Agaricales, f__Tricholomataceae, g__Melanoleuca	0.0635741
												Solicoccozyma	k__Fungi, p__Basidiomycota, c__Tremellomycetes, o__Filobasidiales, f__Piskurozymaceae, g__Solicoccozyma	0.0635741
												Saitozyma	k__Fungi, p__Basidiomycota, c__Tremellomycetes, o__Tremellales, f__Trimorphomycetaceae, g__Saitozyma	0.0625487
												Devriesia	k__Fungi, p__Ascomycota, c__Dothideomycetes, o__Capnodiales, f__Teratosphaeriaceae, g__Devriesia	0.0543456
												Sarocladium	k__Fungi, p__Ascomycota, c__Sordariomycetes, o__Hypocreales, f__Hypocreales_fam_Incertae_sedis, g__Sarocladium	0.050244
												unidentified-21	k__Fungi, p__Ascomycota, c__Sordariomycetes, o__Sordariales, f__Chaetomiaceae, g__unidentified	0.0481933
												Lycoperdon	k__Fungi, p__Basidiomycota, c__Agaricomycetes, o__Agaricales, f__Lycoperdaceae, g__Lycoperdon	0.0481933
												Crocicreas	k__Fungi, p__Ascomycota, c__Leotiomycetes, o__Helotiales, f__Helotiaceae, g__Crocicreas	0.0471679
												Parasola	k__Fungi, p__Basidiomycota, c__Agaricomycetes, o__Agaricales, f__Psathyrellaceae, g__Parasola	0.0451171
												Holtermanniella	k__Fungi, p__Basidiomycota, c__Tremellomycetes, o__Holtermanniales, f__Holtermanniales_fam_Incertae_sedis, g__Holtermanniella	0.0430663
												Hebeloma	k__Fungi, p__Basidiomycota, c__Agaricomycetes, o__Agaricales, f__Hymenogastraceae, g__Hebeloma	0.0389648
												Cyphellophora	k__Fungi, p__Ascomycota, c__Eurotiomycetes, o__Chaetothyriales, f__Cyphellophoraceae, g__Cyphellophora	0.0379394
												unidentified-17	k__Fungi, p__Ascomycota, c__Sordariomycetes, o__Hypocreales, f__Ophiocordycipitaceae, g__unidentified	0.0379394
												unidentified-15	k__Fungi, p__Ascomycota, c__Sordariomycetes, o__Hypocreales, f__Hypocreales_fam_Incertae_sedis, g__unidentified	0.036914
												Entoloma	k__Fungi, p__Basidiomycota, c__Agaricomycetes, o__Agaricales, f__Entolomataceae, g__Entoloma	0.036914
												Psathyrella	k__Fungi, p__Basidiomycota, c__Agaricomycetes, o__Agaricales, f__Psathyrellaceae, g__Psathyrella	0.0358886
												Operculomyces	k__Fungi, p__Chytridiomycota, c__Rhizophydiomycetes, o__Rhizophydiales, f__Rhizophydiales_fam_Incertae_sedis, g__Operculomyces	0.0358886
												Plenodomus	k__Fungi, p__Ascomycota, c__Dothideomycetes, o__Pleosporales, f__Leptosphaeriaceae, g__Plenodomus	0.0338378
												unidentified-33	k__Fungi, p__Basidiomycota, c__Agaricomycetes, o__unidentified, f__unidentified, g__unidentified	0.0328124
												Malassezia	k__Fungi, p__Basidiomycota, c__Malasseziomycetes, o__Malasseziales, f__Malasseziaceae, g__Malassezia	0.031787
												Thelebolus	k__Fungi, p__Ascomycota, c__Leotiomycetes, o__Thelebolales, f__Thelebolaceae, g__Thelebolus	0.0307617
												Glomus	k__Fungi, p__Glomeromycota, c__Glomeromycetes, o__Glomerales, f__Glomeraceae, g__Glomus	0.0307617
												Pluteus	k__Fungi, p__Basidiomycota, c__Agaricomycetes, o__Agaricales, f__Pluteaceae, g__Pluteus	0.0297363
												Olpidium	k__Fungi, p__Olpidiomycota, c__Olpidiomycetes, o__Olpidiales, f__Olpidiaceae, g__Olpidium	0.0297363
												Trichometasphaeria	k__Fungi, p__Ascomycota, c__Dothideomycetes, o__Pleosporales, f__Lophiostomataceae, g__Trichometasphaeria	0.0287109
												Galerina	k__Fungi, p__Basidiomycota, c__Agaricomycetes, o__Agaricales, f__Strophariaceae, g__Galerina	0.0287109
												unidentified-40	k__Fungi, p__Basidiomycota, c__Ustilaginomycetes, o__Ustilaginales, f__Ustilaginaceae, g__unidentified	0.0287109
												Hanseniaspora	k__Fungi, p__Ascomycota, c__Saccharomycetes, o__Saccharomycetales, f__Saccharomycodaceae, g__Hanseniaspora	0.0276855
												Thelephora	k__Fungi, p__Basidiomycota, c__Agaricomycetes, o__Thelephorales, f__Thelephoraceae, g__Thelephora	0.0276855
												Trechispora	k__Fungi, p__Basidiomycota, c__Agaricomycetes, o__Trechisporales, f__Hydnodontaceae, g__Trechispora	0.0276855
												Plectosphaerella	k__Fungi, p__Ascomycota, c__Sordariomycetes, o__Glomerellales, f__Plectosphaerellaceae, g__Plectosphaerella	0.0266601
												Coprinus	k__Fungi, p__Basidiomycota, c__Agaricomycetes, o__Agaricales, f__Agaricaceae, g__Coprinus	0.0266601
												unidentified-36	k__Fungi, p__Basidiomycota, c__Tremellomycetes, o__Cystofilobasidiales, f__unidentified, g__unidentified	0.0266601
												unidentified-23	k__Fungi, p__Ascomycota, c__Sordariomycetes, o__Sordariales, f__Sordariaceae, g__unidentified	0.0256347
												Ustilago	k__Fungi, p__Basidiomycota, c__Ustilaginomycetes, o__Ustilaginales, f__Ustilaginaceae, g__Ustilago	0.0256347
												Aspergillus	k__Fungi, p__Ascomycota, c__Eurotiomycetes, o__Eurotiales, f__Aspergillaceae, g__Aspergillus	0.0246093
												Candida	k__Fungi, p__Ascomycota, c__Saccharomycetes, o__Saccharomycetales, f__Saccharomycetales_fam_Incertae_sedis, g__Candida	0.0246093
												Stagonospora	k__Fungi, p__Ascomycota, c__Dothideomycetes, o__Pleosporales, f__Massarinaceae, g__Stagonospora	0.0235839
												Talaromyces	k__Fungi, p__Ascomycota, c__Eurotiomycetes, o__Eurotiales, f__Trichocomaceae, g__Talaromyces	0.0225585
												Phialea	k__Fungi, p__Ascomycota, c__Pezizomycetes, o__Pezizales, f__Pezizales_fam_Incertae_sedis, g__Phialea	0.0225585
												Leucoagaricus	k__Fungi, p__Basidiomycota, c__Agaricomycetes, o__Agaricales, f__Agaricaceae, g__Leucoagaricus	0.0225585
												Cryptococcus	k__Fungi, p__Basidiomycota, c__Tremellomycetes, o__Tremellales, f__Tremellaceae, g__Cryptococcus	0.0225585
												Apiotrichum	k__Fungi, p__Basidiomycota, c__Tremellomycetes, o__Trichosporonales, f__Trichosporonaceae, g__Apiotrichum	0.0225585
												Rhizophydium	k__Fungi, p__Chytridiomycota, c__Rhizophydiomycetes, o__Rhizophydiales, f__Rhizophydiaceae, g__Rhizophydium	0.0225585
												Fusicolla	k__Fungi, p__Ascomycota, c__Sordariomycetes, o__Hypocreales, f__Nectriaceae, g__Fusicolla	0.0215332
												Microascus	k__Fungi, p__Ascomycota, c__Sordariomycetes, o__Microascales, f__Microascaceae, g__Microascus	0.0215332
												unidentified-26	k__Fungi, p__Ascomycota, c__Sordariomycetes, o__Xylariales, f__Microdochiaceae, g__unidentified	0.0215332
												Stachybotrys	k__Fungi, p__Ascomycota, c__Sordariomycetes, o__Hypocreales, f__Stachybotryaceae, g__Stachybotrys	0.0205078
												Tricholoma	k__Fungi, p__Basidiomycota, c__Agaricomycetes, o__Agaricales, f__Tricholomataceae, g__Tricholoma	0.0205078
												Pleurotheciella	k__Fungi, p__Ascomycota, c__Sordariomycetes, o__Pleurotheciales, f__Pleurotheciaceae, g__Pleurotheciella	0.0194824
												Paralepista	k__Fungi, p__Basidiomycota, c__Agaricomycetes, o__Agaricales, f__Tricholomataceae, g__Paralepista	0.0194824
												Schwanniomyces	k__Fungi, p__Ascomycota, c__Saccharomycetes, o__Saccharomycetales, f__Debaryomycetaceae, g__Schwanniomyces	0.018457
												Collarina	k__Fungi, p__Ascomycota, c__Sordariomycetes, o__Hypocreales, f__Clavicipitaceae, g__Collarina	0.018457
												Cystobasidium	k__Fungi, p__Basidiomycota, c__Cystobasidiomycetes, o__Cystobasidiales, f__Cystobasidiaceae, g__Cystobasidium	0.018457
												Ramularia	k__Fungi, p__Ascomycota, c__Dothideomycetes, o__Capnodiales, f__Mycosphaerellaceae, g__Ramularia	0.0174316
												Tuber	k__Fungi, p__Ascomycota, c__Pezizomycetes, o__Pezizales, f__Tuberaceae, g__Tuber	0.0174316
												Lepista	k__Fungi, p__Basidiomycota, c__Agaricomycetes, o__Agaricales, f__Tricholomataceae, g__Lepista	0.0174316
												Auricularia	k__Fungi, p__Basidiomycota, c__Agaricomycetes, o__Auriculariales, f__Auriculariaceae, g__Auricularia	0.0174316
												Lactarius	k__Fungi, p__Basidiomycota, c__Agaricomycetes, o__Russulales, f__Russulaceae, g__Lactarius	0.0174316
												unidentified-37	k__Fungi, p__Basidiomycota, c__Tremellomycetes, o__Tremellales, f__unidentified, g__unidentified	0.0174316
												Trichocladium	k__Fungi, p__Ascomycota, c__Ascomycota_cls_Incertae_sedis, o__Ascomycota_ord_Incertae_sedis, f__Ascomycota_fam_Incertae_sedis, g__Trichocladium	0.0153808
												Zymoseptoria	k__Fungi, p__Ascomycota, c__Dothideomycetes, o__Capnodiales, f__Mycosphaerellaceae, g__Zymoseptoria	0.0153808
												Pleurophoma	k__Fungi, p__Ascomycota, c__Dothideomycetes, o__Pleosporales, f__Lentitheciaceae, g__Pleurophoma	0.0153808
												Gibellulopsis	k__Fungi, p__Ascomycota, c__Sordariomycetes, o__Glomerellales, f__Plectosphaerellaceae, g__Gibellulopsis	0.0153808
												Erythrobasidium	k__Fungi, p__Basidiomycota, c__Cystobasidiomycetes, o__Erythrobasidiales, f__Erythrobasidiaceae, g__Erythrobasidium	0.0153808
												unidentified-41	k__Fungi, p__Chytridiomycota, c__unidentified, o__unidentified, f__unidentified, g__unidentified	0.0153808
												unidentified-43	k__Fungi, p__Olpidiomycota, c__Olpidiomycetes, o__Olpidiales, f__unidentified, g__unidentified	0.0153808
												Cordyceps	k__Fungi, p__Ascomycota, c__Sordariomycetes, o__Hypocreales, f__Cordycipitaceae, g__Cordyceps	0.0143554
												Phaeoacremonium	k__Fungi, p__Ascomycota, c__Sordariomycetes, o__Togniniales, f__Togniniaceae, g__Phaeoacremonium	0.0143554
												Boletus	k__Fungi, p__Basidiomycota, c__Agaricomycetes, o__Boletales, f__Boletaceae, g__Boletus	0.0143554
												Sporobolomyces	k__Fungi, p__Basidiomycota, c__Microbotryomycetes, o__Sporidiobolales, f__Sporidiobolaceae, g__Sporobolomyces	0.0143554
												Neostagonospora	k__Fungi, p__Ascomycota, c__Dothideomycetes, o__Pleosporales, f__Phaeosphaeriaceae, g__Neostagonospora	0.0133301
												Lecythophora	k__Fungi, p__Ascomycota, c__Sordariomycetes, o__Coniochaetales, f__Coniochaetaceae, g__Lecythophora	0.0133301
												Humicola	k__Fungi, p__Ascomycota, c__Sordariomycetes, o__Sordariales, f__Chaetomiaceae, g__Humicola	0.0133301
												Apodus	k__Fungi, p__Ascomycota, c__Sordariomycetes, o__Sordariales, f__Lasiosphaeriaceae, g__Apodus	0.0133301
												Sordaria	k__Fungi, p__Ascomycota, c__Sordariomycetes, o__Sordariales, f__Sordariaceae, g__Sordaria	0.0133301
												Auxarthron	k__Fungi, p__Ascomycota, c__Eurotiomycetes, o__Onygenales, f__Onygenaceae, g__Auxarthron	0.0123047
												Isaria	k__Fungi, p__Ascomycota, c__Sordariomycetes, o__Hypocreales, f__Cordycipitaceae, g__Isaria	0.0123047
												Tomentella	k__Fungi, p__Basidiomycota, c__Agaricomycetes, o__Thelephorales, f__Thelephoraceae, g__Tomentella	0.0123047
												Pseudohyphozyma	k__Fungi, p__Basidiomycota, c__Microbotryomycetes, o__Microbotryomycetes_ord_Incertae_sedis, f__Chrysozymaceae, g__Pseudohyphozyma	0.0123047
												unidentified-42	k__Fungi, p__Glomeromycota, c__Glomeromycetes, o__Glomerales, f__Glomeraceae, g__unidentified	0.0123047
												Neobulgaria	k__Fungi, p__Ascomycota, c__Leotiomycetes, o__Helotiales, f__Leotiaceae, g__Neobulgaria	0.0112793
												unidentified-14	k__Fungi, p__Ascomycota, c__Sordariomycetes, o__Hypocreales, f__Hypocreaceae, g__unidentified	0.0112793
												Gibberella	k__Fungi, p__Ascomycota, c__Sordariomycetes, o__Hypocreales, f__Nectriaceae, g__Gibberella	0.0112793
												Clitocybe	k__Fungi, p__Basidiomycota, c__Agaricomycetes, o__Agaricales, f__Tricholomataceae, g__Clitocybe	0.0112793
												Gymnoascus	k__Fungi, p__Ascomycota, c__Eurotiomycetes, o__Onygenales, f__Gymnoascaceae, g__Gymnoascus	0.0102539
												Claviceps	k__Fungi, p__Ascomycota, c__Sordariomycetes, o__Hypocreales, f__Clavicipitaceae, g__Claviceps	0.0102539
												Collybia	k__Fungi, p__Basidiomycota, c__Agaricomycetes, o__Agaricales, f__Tricholomataceae, g__Collybia	0.0102539
												Pyrenochaeta	k__Fungi, p__Ascomycota, c__Dothideomycetes, o__Pleosporales, f__Cucurbitariaceae, g__Pyrenochaeta	0.0092285
												Biappendiculispora	k__Fungi, p__Ascomycota, c__Dothideomycetes, o__Pleosporales, f__Lophiostomataceae, g__Biappendiculispora	0.0092285
												Camarosporium	k__Fungi, p__Ascomycota, c__Dothideomycetes, o__Pleosporales, f__Pleosporales_fam_Incertae_sedis, g__Camarosporium	0.0092285
												Geosmithia	k__Fungi, p__Ascomycota, c__Sordariomycetes, o__Hypocreales, f__Bionectriaceae, g__Geosmithia	0.0092285
												Nectria	k__Fungi, p__Ascomycota, c__Sordariomycetes, o__Hypocreales, f__Nectriaceae, g__Nectria	0.0092285
												Piskurozyma	k__Fungi, p__Basidiomycota, c__Tremellomycetes, o__Filobasidiales, f__Piskurozymaceae, g__Piskurozyma	0.0092285
												Tetracladium	k__Fungi, p__Ascomycota, c__Ascomycota_cls_Incertae_sedis, o__Ascomycota_ord_Incertae_sedis, f__Ascomycota_fam_Incertae_sedis, g__Tetracladium	0.00820311
												unidentified-30	k__Fungi, p__Basidiomycota, c__Agaricomycetes, o__Cantharellales, f__Tulasnellaceae, g__unidentified	0.00820311
												unidentified-34	k__Fungi, p__Basidiomycota, c__Malasseziomycetes, o__Malasseziales, f__unidentified, g__unidentified	0.00820311
												Syncephalis	k__Fungi, p__Zoopagomycota, c__Zoopagomycetes, o__Zoopagales, f__Piptocephalidaceae, g__Syncephalis	0.00820311
												Extremus	k__Fungi, p__Ascomycota, c__Dothideomycetes, o__Capnodiales, f__Extremaceae, g__Extremus	0.00717772
												unidentified-25	k__Fungi, p__Ascomycota, c__Sordariomycetes, o__Xylariales, f__Diatrypaceae, g__unidentified	0.00717772
												Aureobasidium	k__Fungi, p__Ascomycota, c__Dothideomycetes, o__Dothideales, f__Aureobasidiaceae, g__Aureobasidium	0.00615233
												unidentified-02	k__Fungi, p__Ascomycota, c__Dothideomycetes, o__Pleosporales, f__Leptosphaeriaceae, g__unidentified	0.00615233
												Cosmospora	k__Fungi, p__Ascomycota, c__Sordariomycetes, o__Hypocreales, f__Nectriaceae, g__Cosmospora	0.00615233
												Hannaella	k__Fungi, p__Basidiomycota, c__Tremellomycetes, o__Tremellales, f__Bulleribasidiaceae, g__Hannaella	0.00615233
												Angustimassarina	k__Fungi, p__Ascomycota, c__Dothideomycetes, o__Pleosporales, f__Amorosiaceae, g__Angustimassarina	0.00512694
												Preussia	k__Fungi, p__Ascomycota, c__Dothideomycetes, o__Pleosporales, f__Sporormiaceae, g__Preussia	0.00512694
												unidentified-04	k__Fungi, p__Ascomycota, c__Dothideomycetes, o__Pleosporales, f__Sporormiaceae, g__unidentified	0.00512694
												Phialophora	k__Fungi, p__Ascomycota, c__Eurotiomycetes, o__Chaetothyriales, f__Herpotrichiellaceae, g__Phialophora	0.00512694
												Leucothecium	k__Fungi, p__Ascomycota, c__Eurotiomycetes, o__Onygenales, f__Gymnoascaceae, g__Leucothecium	0.00512694
												Paxillus	k__Fungi, p__Basidiomycota, c__Agaricomycetes, o__Boletales, f__Paxillaceae, g__Paxillus	0.00512694
												Daedaleopsis	k__Fungi, p__Basidiomycota, c__Agaricomycetes, o__Polyporales, f__Coriolaceae, g__Daedaleopsis	0.00512694
												Pseudogymnoascus	k__Fungi, p__Ascomycota, c__Leotiomycetes, o__Leotiomycetes_ord_Incertae_sedis, f__Pseudeurotiaceae, g__Pseudogymnoascus	0.00410155
												unidentified-12	k__Fungi, p__Ascomycota, c__Saccharomycetes, o__Saccharomycetales, f__Saccharomycetales_fam_Incertae_sedis, g__unidentified	0.00410155
												Pochonia	k__Fungi, p__Ascomycota, c__Sordariomycetes, o__Hypocreales, f__Clavicipitaceae, g__Pochonia	0.00410155
												Cercophora	k__Fungi, p__Ascomycota, c__Sordariomycetes, o__Sordariales, f__Lasiosphaeriaceae, g__Cercophora	0.00410155
												Leucosporidium	k__Fungi, p__Basidiomycota, c__Microbotryomycetes, o__Leucosporidiales, f__Leucosporidiaceae, g__Leucosporidium	0.00410155
												Chrysosporium	k__Fungi, p__Ascomycota, c__Eurotiomycetes, o__Onygenales, f__Onygenales_fam_Incertae_sedis, g__Chrysosporium	0.00307617
												Savoryella	k__Fungi, p__Ascomycota, c__Sordariomycetes, o__Savoryellales, f__Savoryellales_fam_Incertae_sedis, g__Savoryella	0.00307617
												Hypoxylon	k__Fungi, p__Ascomycota, c__Sordariomycetes, o__Xylariales, f__Xylariaceae, g__Hypoxylon	0.00307617
												Darksidea	k__Fungi, p__Ascomycota, c__Dothideomycetes, o__Pleosporales, f__Lentitheciaceae, g__Darksidea	0.00205078
												Pichia	k__Fungi, p__Ascomycota, c__Saccharomycetes, o__Saccharomycetales, f__Pichiaceae, g__Pichia	0.00205078
												Coniochaeta	k__Fungi, p__Ascomycota, c__Sordariomycetes, o__Coniochaetales, f__Coniochaetaceae, g__Coniochaeta	0.00205078
												Verticillium	k__Fungi, p__Ascomycota, c__Sordariomycetes, o__Glomerellales, f__Plectosphaerellaceae, g__Verticillium	0.00205078
